# Supplementary material for: Resource use of healthcare services 1 year after stroke: a secondary analysis of a cluster-randomised controlled trial of a client-centred activities of daily living intervention
Source: PubMed Central journal article supplement — BMJ Open. 2018 Aug 5;8(8):e022222. doi: 10.1136/bmjopen-2018-022222 (PMC6078276; doi:10.1136/bmjopen-2018-022222), 2018-08-05
Supplement: bmjopen-2018-022222.draft_revisions.pdf [file bmjopen-2018-022222.draft_revisions.pdf]

# BMJ Open

BMJ Open is committed to open peer review. As part of this commitment we make the peer review history of every article we publish publicly available.

When an article is published we post the peer reviewers' comments and the authors' responses online. We also post the versions of the paper that were used during peer review. These are the versions that the peer review comments apply to.

The versions of the paper that follow are the versions that were submitted during the peer review process. They are not the versions of record or the final published versions. They should not be cited or distributed as the published version of this manuscript.

BMJ Open is an open access journal and the full, final, typeset and author-corrected version of record of the manuscript is available on our site with no access controls, subscription charges or pay-per-view fees (<http://bmjopen.bmj.com>).

If you have any questions on BMJ Open's open peer review process please email [info.bmjopen@bmj.com](mailto:info.bmjopen@bmj.com)

# BMJ Open

## Resource use of health care services one year after stroke: subgroup analysis of a cluster-randomized controlled trial of a client-centred ADL intervention

|                               |                                                                                                                                                                                                                                                                                                                                                                                                                                                                                                                                                                                                                                                                                                                                                                                                                                                                                                                                                                                                                                                                                                              |
|-------------------------------|--------------------------------------------------------------------------------------------------------------------------------------------------------------------------------------------------------------------------------------------------------------------------------------------------------------------------------------------------------------------------------------------------------------------------------------------------------------------------------------------------------------------------------------------------------------------------------------------------------------------------------------------------------------------------------------------------------------------------------------------------------------------------------------------------------------------------------------------------------------------------------------------------------------------------------------------------------------------------------------------------------------------------------------------------------------------------------------------------------------|
| Journal:                      | <i>BMJ Open</i>                                                                                                                                                                                                                                                                                                                                                                                                                                                                                                                                                                                                                                                                                                                                                                                                                                                                                                                                                                                                                                                                                              |
| Manuscript ID                 | bmjopen-2018-022222                                                                                                                                                                                                                                                                                                                                                                                                                                                                                                                                                                                                                                                                                                                                                                                                                                                                                                                                                                                                                                                                                          |
| Article Type:                 | Research                                                                                                                                                                                                                                                                                                                                                                                                                                                                                                                                                                                                                                                                                                                                                                                                                                                                                                                                                                                                                                                                                                     |
| Date Submitted by the Author: | 06-Feb-2018                                                                                                                                                                                                                                                                                                                                                                                                                                                                                                                                                                                                                                                                                                                                                                                                                                                                                                                                                                                                                                                                                                  |
| Complete List of Authors:     | Tistad, Malin; Karolinska Institutet, Department of Neurobiology, Care Sciences and Society; Dalarna University, School of Education, Health and Social studies<br>Flink, Maria; Karolinska Institutet, Department of Learning, Informatics, Management and Ethics; Karolinska University Hospital, Function Area Social Work in Health<br>Ytterberg, Charlotte; Karolinska Institutet, Department of Neurobiology, Care Sciences and Society; Karolinska University Hospital, Function Area Occupational Therapy & Physiotherapy<br>Eriksson, Gunilla; Karolinska Institutet, Department of Neurobiology, Care Sciences and Society; Uppsala University, Department of Neuroscience, Rehabilitation Medicine<br>Guidetti, Susanne; Karolinska Institutet, Department of Neurobiology, Care Sciences and Society<br>Tham, Kerstin; Karolinska Institutet, Department of Neurobiology, Care Sciences and Society ; Malmö University, Faculty of Health and Society von Koch, Lena; Karolinska Institutet, Department of Neurobiology, Care Sciences and Society ; Karolinska University Hospital, Theme Neuro |
| Keywords:                     | Stroke < NEUROLOGY, Organisation of health services < HEALTH SERVICES ADMINISTRATION & MANAGEMENT, Rehabilitation medicine < INTERNAL MEDICINE                                                                                                                                                                                                                                                                                                                                                                                                                                                                                                                                                                                                                                                                                                                                                                                                                                                                                                                                                               |
|                               |                                                                                                                                                                                                                                                                                                                                                                                                                                                                                                                                                                                                                                                                                                                                                                                                                                                                                                                                                                                                                                                                                                              |

SCHOLARONE™  
Manuscripts

1  
2  
3 Resource use of health care services one year after stroke: subgroup  
4 analysis of a cluster-randomized controlled trial of a client-centred  
5 ADL intervention  
6  
7  
8  
9

10 Malin Tistad<sup>1,2,3\*</sup>, Maria Flink<sup>4,5</sup>, Charlotte Ytterberg<sup>6,7</sup>, Gunilla Eriksson<sup>1,8</sup> Susanne  
11 Guidetti<sup>1</sup>, Kerstin Tham<sup>1,9</sup>, Lena von Koch<sup>1,10</sup>  
12  
13  
14

15  
16  
17 Corresponding author: Malin Tistad,  
18

19 Postal address: School of Education, Health and Social Studies, Dalarna University, SE 791  
20 88 Falun, Sweden.  
21

22 E-mail: mti@du.se  
23

24 Telephone: +46 70 726 30 32  
25  
26  
27  
28

29 <sup>1</sup>Division of Occupational Therapy, Department of Neurobiology, Care Sciences and Society  
30 Karolinska Institutet, Huddinge, Sweden  
31

32 <sup>2</sup>School of Education, Health and Social Studies, Dalarna University, Falun, Sweden  
33

34 <sup>3</sup>Department of Rehabilitation and Social Medicine. Physiotherapy. Umeå University, Umeå,  
35 Sweden  
36  
37

38 <sup>4</sup>Function Area Social Work in Health, Karolinska University Hospital, Stockholm, Sweden  
39

40 <sup>5</sup>Department of Learning, Informatics, Management, and Ethics, Karolinska Institutet,  
41 Stockholm, Sweden  
42  
43

44 <sup>6</sup>Division of Physiotherapy, Department of Neurobiology, Care Sciences and Society,  
45 Karolinska Institutet, Huddinge, Sweden.  
46  
47

48 <sup>7</sup>Function Area Occupational Therapy & Physiotherapy, Karolinska University Hospital,  
49 Stockholm, Sweden.  
50

51 <sup>8</sup>Department of Neuroscience, Rehabilitation Medicine, Uppsala University, Uppsala, Sweden  
52  
53

54 <sup>9</sup>Faculty of Health and Society, Malmö University, Malmö, Sweden  
55

56 <sup>10</sup>Theme Neuro, Karolinska University Hospital, Stockholm, Sweden  
57  
58  
59  
60

1  
2  
3  
4  
5 Word count: 3 525  
6  
7  
8  
9  
10  
11  
12  
13  
14  
15  
16  
17  
18  
19  
20  
21  
22  
23  
24  
25  
26  
27  
28  
29  
30  
31  
32  
33  
34  
35  
36  
37  
38  
39  
40  
41  
42  
43  
44  
45  
46  
47  
48  
49  
50  
51  
52  
53  
54  
55  
56  
57  
58  
59  
60

For peer review only

## ABSTRACT

### Objective

The objective of the study was to compare the total use of health care services in the course of the first year after a stroke between participants who, after the acute care, had received occupational therapy as a client-centred activities of daily living (ADL) intervention (CADL) and participants who had received ADL interventions as usual (UADL).

### Design

A subgroup analyses of a multicentre cluster-randomized controlled trial.

### Setting

Primary and secondary care,

### Participants:

Participants were included if we could retrieve data about their use of health care services provided by the county council from computerized registers. The participants received rehabilitation either as inpatients in geriatric rehabilitation units (CADL n=26/UADL n=46) or in their own homes (CADL n=13/UADL n=25).

### Interventions:

CADL or UADL.

### Outcome measures:

Data on independence in ADL, perceived impact of stroke and global life satisfaction was collected at baseline and at 12 months. Data on the use of inpatient and outpatient care was collected from a computerised register.

### Results

Participants in the CADL group who received geriatric inpatient rehabilitation had a shorter length of hospital stay ( $p=0.03$ ) than participants in the UADL-group, and the CADL group with home rehabilitation had fewer outpatient contacts ( $p=0.01$ ) compared to the UADL group. Multiple regression analyses showed that in four of the models a higher age was associated with a lower use of health care services. The use of health care services was also

1  
2  
3 associated (some of the models) with dependence in ADL, stroke severity and type of  
4 rehabilitation received, CADL or UADL.  
5

## 6 7 **Conclusions**

8  
9 The provision of client-centred occupational therapy after stroke did not appear to increase the  
10 use of health care services during the first year after stroke.  
11  
12  
13

14  
15 Key words: health care services, resource utilization,  
16

17  
18 **Trial registration:** ClinicalTrials.gov NCT01417585  
19  
20  
21  
22  
23  
24  
25  
26  
27  
28  
29  
30  
31  
32  
33  
34  
35  
36  
37  
38  
39  
40  
41  
42  
43  
44  
45  
46  
47  
48  
49  
50  
51  
52  
53  
54  
55  
56  
57  
58  
59  
60

## ARTICLE SUMMARY

### Strengths and limitations of this study

- A major strength is the use of computerized data on the use of health care services as recall bias is eliminated.
- Comparisons were adjusted for other variables than the intervention received, that might influence the resource use of health care services.
- Analyses were performed separately for the two groups of clients – those included at the geriatric rehabilitation ward and those included at units that provided home rehabilitation – as there might be different patterns depending on how the rehabilitation is organized.
- A limitation is that the groups were quite small, and the ability to identify differences that are small but of clinical relevance were limited

## INTRODUCTION

Client-centred care and rehabilitation involve key concepts such as individual autonomy and choice, partnership, therapist and client responsibility as well as enablement<sup>1</sup> and implies that the client is actively involved in defining needs, goals, outcomes and setting priorities<sup>2</sup>.

Client-centred rehabilitation has been suggested to improve outcomes, and satisfaction with care for persons with stroke<sup>3,4</sup> and is often referred to as a measure of high quality care<sup>5,6</sup>. However, persons with chronic conditions in Sweden receive significantly less client-centered care than comparable countries<sup>7</sup> and voices have been raised that the provision of client-centered care and rehabilitation is resource- and time consuming<sup>8,9</sup>.

In Sweden, the rehabilitation after stroke is organized in chains of care. Following the acute treatment, patients are referred to rehabilitation provided at a specialized level and organized as inpatient rehabilitation and/or outpatient rehabilitation. Further rehabilitation can also be organized by the primary care and provided in the patient's home by specially trained stroke teams, henceforth referred to as home rehabilitation, or as general rehabilitation provided as outpatient care at the primary care clinic. Health care services should, according to the Health and Medical Service Act<sup>10</sup>, be offered based on each individual's needs, and a patient can be referred to one or more of these types of rehabilitation. In addition to individuals' needs, the type of rehabilitation offered is partly dependent on age, as geriatric rehabilitation is offered to people above the age of 65 and medical rehabilitation to people of working age.

The organization with levels of care embeds multiple transitions between different care providers and professionals. Care transition interventions with client-centred approaches targeting the transition between hospital and primary care have been shown to reduce re-hospitalizations and length of stay (LOS) for multiple patient diagnostic groups<sup>11-14</sup>. However, these studies only consider a specific episode of care or care transition and not the total use of health care services. As a shortened LOS and reduced re-hospitalizations could potentially increase the use of, for instance, primary care, it is important to capture the total use of health care services. The present study was conducted in the context of a multicentre cluster-randomized controlled trial of occupational therapy after the acute care in a stroke unit. Occupational therapy, provided as client-centred activities of daily living (ADL) interventions (CADL) was compared to usual ADL interventions (UADL). The aim of the CADL intervention was to enable agency in daily activities and participation in everyday life and the intervention has previously been described in detail<sup>15,16</sup>.



1  
2  
3 The purpose of the present study was to explore the association between the use of health care  
4 services in the course of the first year after stroke and type of occupational therapy  
5 interventions (CADL or UADL) while adjusting for social-demographics and capacity in  
6 ADL.  
7  
8  
9

## 10 **METHODS**

### 11 **Design**

12  
13  
14 This study is a subgroup analysis of health care use in the context of a multicentre cluster-  
15 randomized controlled trial (RCT) in which an intervention group received CADL and a  
16 control group received UADL<sup>15 16</sup>. Sixteen rehabilitation units in Stockholm, Uppsala and  
17 Gävleborg County Councils in Sweden were asked to participate. The rehabilitation units in  
18 Stockholm (included in the analyses of the present study) were randomly assigned to provide  
19 CADL or UADL stratified as 1) geriatric inpatient rehabilitation (geriatric rehabilitation  
20 wards), or 2) home rehabilitation (specially trained stroke teams providing rehabilitation in  
21 patients' homes).  
22  
23  
24  
25  
26  
27

### 28 **Participants in the multicentre cluster-randomized trial**

29  
30 Eligible for inclusion in the RCT were people who were: (a) treated for acute stroke in a  
31 stroke unit  $\leq 3$  months after stroke onset, (b) dependent in at least two ADL domains  
32 according to Katz Extended ADL Index<sup>17</sup>, (c) not diagnosed with dementia, (d) able to  
33 understand and follow instructions, and (e) referred for rehabilitation to one of the 16  
34 participating units.  
35  
36  
37  
38

### 39 **Interventions**

40  
41  
42 The occupational therapists (OTs) who conducted the CADL intervention had participated in  
43 a 5-day workshop<sup>18</sup>. The CADL presented a structure involving nine components<sup>15</sup> for how  
44 to discover and resolve problems faced in daily activities after stroke. Two general strategies  
45 were combined and used by the OTs across the nine components (i.e. during the whole  
46 intervention process) in order to enable change: 1) using the client's lived experience as a  
47 point of departure, and 2) enabling significant experience to be gained from doing valued  
48 daily activities. To facilitate a successful performance of the selected activities, the client, in  
49 collaboration with the OT, identified specific strategies to resolve upcoming difficulties with  
50 performance. The participant together with the OT reflected on the specific strategies used  
51  
52  
53  
54  
55  
56  
57  
58  
59  
60

1  
2  
3 during the CADL intervention in order to facilitate transfer of use of these strategies to future  
4 activities in new daily situations.  
5

6  
7 The UADL interventions varied according to the routines and praxis of the participating  
8 rehabilitation units. The participants in both groups received other rehabilitation services, e.g.  
9 physiotherapy and speech therapy, as needed.  
10

### 11 12 **Participants in the subgroup analysis of the present study**

13  
14  
15 The inclusion criterion for the present study was that all data about the participant's use of  
16 health care services provided by the county council was available in a computerized register.  
17 Only the participants cared for in Stockholm County Council fulfilled this criterion.  
18  
19

### 20 **Outcomes**

#### 21 Use of health care services

22  
23  
24 All data regarding the participants' use of healthcare services during the first 12 months after  
25 stroke was collected from Stockholm County Council's computerised database. The LOS at  
26 inpatient care as well as number of contacts with outpatient care was identified.  
27  
28  
29

30  
31 Inpatient care was categorised into LOS at the stroke units, at rehabilitation wards and  
32 recurrent inpatients stays.  
33

34  
35 The outpatient contacts included contacts at a specialized care level and primary care level.  
36 The specialised outpatient care contacts were categorised based on type of department  
37 (neurology department/other departments), health profession (physician/nurse) and type of  
38 contact (visit/telephone). The specialised outpatient rehabilitation contacts were categorised  
39 into visits to a specific rehabilitation professional (occupational therapist, physiotherapist,  
40 speech and language therapist, medical social worker or psychologist) or day-visits at day-  
41 hospital rehabilitation.  
42  
43  
44  
45

46  
47 The contacts with rehabilitation in primary care were categorised into general rehabilitation or  
48 stroke team rehabilitation. The CADL/UADL interventions were provided by these stroke  
49 teams primarily in the participants' homes, but occasionally also in outpatient clinics.  
50

51 Remaining primary care visits were categorised based on health profession (physician/  
52 nurse/assistant nurse) and type of contact.  
53  
54

#### 55 Aspects of functioning and disability

1  
2  
3 Data on different aspects of functioning and disability was collected at the rehabilitation units  
4 at baseline and in the participants' homes at 12 months by specially trained data collectors  
5 who were blinded to the participants' group belonging. More details about the data collection  
6 is provided in Guidetti et al 2015<sup>16</sup>.  
7  
8

9  
10 The Katz Extended ADL Index assesses dependence/independence of assistance in six  
11 activities categorized as "personal-ADL" and four items categorized as "instrumental-ADL".  
12 The Katz Extended ADL Index was used at baseline with regard to dependence/independence  
13 in ADL before stroke and further at 12 months. The Katz Extended ADL Index is presented as  
14 a score between 0 and 10 where 10 indicates independence in personal-ADL and instrumental  
15 ADL. The Katz Extended ADL Index was also trichotomized as a) dependent in personal-  
16 ADL and instrumental ADL, b) dependent in personal-ADL or instrumental ADL or c)  
17 independent in personal-ADL and instrumental ADL.  
18  
19

20  
21 The Barthel Index<sup>19</sup> was used to assess capacity in ADL at baseline and at 12 months. The  
22 score ranges from 0 to 100, and a higher score indicates a higher level of capacity.  
23 Additionally, the Barthel Index score from the baseline assessment was used to categorize the  
24 severity of the participants' stroke into mild, moderate or severe<sup>20</sup>.  
25  
26

27  
28 The Stroke Impact Scale 3.0 (SIS)<sup>21</sup> is a patient-centred measure on the perceived impact of  
29 stroke in the eight domains: strength, memory and thinking, emotions, communication,  
30 ADL/IADL, mobility, hand function and participation. Each domain contains four to ten items  
31 that are rated on a 5-grade scale by the participant. The ratings on each domain are then  
32 transformed to a scale between 0 and 100, where 100 indicates no impact from the stroke. In  
33 addition, the SIS contains a scale on which the participants are asked to rate their perceived  
34 recovery at between 0 (no recovery) and 100 (completely recovered). At baseline, only the  
35 recovery scale was used, whereas the full instrument was used at 12 months.  
36  
37

38  
39 The Life Satisfaction Checklist<sup>22</sup> was used to collect data on perceived global life  
40 satisfaction. Global life satisfaction is scored on a 6-graded scale from very satisfying (6) to  
41 very dissatisfying (1).  
42  
43

#### 44 **Sample size**

45  
46 In the cluster randomized trial power calculations were performed and sample size was  
47 decided based on the primary outcome the SIS domain participation. No power calculation  
48 was performed for the outcome use of health services.  
49  
50

## Blinding

The data collectors were blinded to which type of interventions that was delivered by which site. Further, during the data analysis of the present study the first and the last authors and the statistician were blinded to the participants' group belonging.

## Patient involvement

The design, the intervention, and the choice of outcome measures were based on our previous studies on the lived experiences of recapturing self-care after stroke<sup>23 24</sup>. However, no patients were directly involved in the development of research questions, outcome measures, design of this study, recruitment to, or conduct of the study. Findings from the study will be not be reported directly to the study participants but we will submit a report of the findings and conclusions for the patient organisations' newsletters.

## Statistical methods

All analyses were performed separately for the groups of participants included in the different strata. In order to assess the comparability of the groups (CADL and UADL), with regard to socio-demographics and aspects of disability, the chi-square test was used for categorical data and the Mann-Whitney U test was used for continuous data. The Mann-Whitney U test was further used for comparisons of the use of health care services between the groups.

Multiple regression analyses were used in order to explore the association between the type of occupational therapy ADL intervention received (CADL or UADL) and 1) *initial LOS* including the initial episode of care i.e. acute stroke unit and inpatient rehabilitation) 2) *total LOS*, including all inpatient care 0–12 months, 3) *outpatient rehabilitation*, including all contacts with outpatient rehabilitation services 0–12 months and 4) *total outpatient*, including all contacts with outpatient health care services 0–12 months.

Co-variables included in all analyses were: age, sex, independence/dependence in ADL before stroke according to KE (independent in P-ADL and I-ADL/dependent in P-ADL or I-ADL/dependent in P-ADL and I-ADL), stroke severity at baseline (mild/moderate) and capacity in ADL (BI-score) at baseline. Age was centred on the mean age in the regression models, where age is included in interaction terms (age\*stroke severity and age\*group) due to issues of multicollinearity.

Significance level was specified at 0.05 and all analyses were performed using Statistica 13.

## RESULTS

A total of 111 persons were included in the original RCT in Stockholm County Council. One had an incorrect identification number and data on health care use could not be retrieved. Out of the remaining 110 persons, 72 were included on geriatric rehabilitation wards and 38 participants were included in units that provided home rehabilitation. Among those included in geriatric rehabilitation units, 26 received the CADL intervention (the geriatric CADL group) and 46 received UADL (the geriatric UADL group). Among those included in home rehabilitation, 13 received the CADL intervention (the home CADL group) and 25 received UADL (the home UADL group).

### Characteristics of the participants

As shown in Table 1, the geriatric CADL group was older than the geriatric UADL group (median 77.5 vs 68,  $p<0.001$ ) and had a lower Barthel Index score at baseline (median 52.5 vs 65,  $p=0.05$ ). At 12 months, the geriatric CADL group perceived a higher impact of stroke on ADL (SIS) (median 69 vs 83,  $p=0.03$ ). The home CADL group was to a larger extent dependent in ADL before stroke compared to the home UADL group (dependent in personal-ADL and instrumental-ADL,  $n=3$  vs  $0$ /dependent in personal-ADL or instrumental-ADL,  $n=3$  vs  $7$ /independent,  $n=7$  vs  $18$ ,  $p=0.04$ ) (Table 2). At 12 months, the home rehabilitation CADL group perceived a higher impact of stroke on hand function (SIS) compared to the home rehabilitation UADL group (median 52.5 vs 85,  $p=0.01$ ).

Table 1. Characteristics at baseline and at 12 months for the geriatric rehabilitation groups

|                                                                                          | Geriatric CADL group<br>n=26 | Geriatric UADL<br>group n=46 | p-value |
|------------------------------------------------------------------------------------------|------------------------------|------------------------------|---------|
| Age (years) median/mean (min-max)                                                        | 77.5/77.5 (66-89)            | 68/67.4 (39-89)              | <0.001  |
| Sex: male/female (n)                                                                     | 16/10                        | 28/18                        | 0.95    |
| Civil status: living together/living alone (n)                                           | 14/12                        | 28/18                        | 0.56    |
| Education: nine years or less/more than nine years (n)                                   | 10/16                        | 19/27                        | 0.81    |
| <b>Before stroke</b>                                                                     |                              |                              |         |
| Katz Extended Index of ADL median (IQR)                                                  | 10 (8-10)                    | 10 (9-10)                    | 0.46    |
| Dependence in ADL*: dependent in P-ADL and I-ADL/dependent in P-ADL or I-ADL/independent | 5/4/17                       | 2/12/32                      | 0.10    |
| <b>At inclusion in study</b>                                                             |                              |                              |         |
| Stroke severity mild/moderate/severe                                                     | 15/10/1                      | 35/11/0                      | 0.15    |
| Barthel Index median (IQR)                                                               | 52.5 (45-65)                 | 65 (50-90)                   | 0.05    |
| SIS Recovery median (IQR)                                                                | 30 (13-40)                   | 40 (20-65)                   | 0.08    |
| <b>At twelve months</b>                                                                  |                              |                              |         |
|                                                                                          | <b>n=22</b>                  | <b>n=35</b>                  |         |
| Barthel Index median (IQR)                                                               | 92.5 (80-100)                | 95 (85-100)                  | 0.27    |
| Katz Index of ADL median (IQR)                                                           | 7 (5-7)                      | 8 (6-10)                     | 0.10    |
| Stroke Impact Scale median/mean (IQR)                                                    |                              |                              |         |
| Recovery                                                                                 | 52.5/54 (40-70)              | 62.5/60 (40-80) <sup>3</sup> | 0.32    |

|                                       |                                  |                                |             |
|---------------------------------------|----------------------------------|--------------------------------|-------------|
| Strength                              | 50/55 (37.5-62.5) <sup>1</sup>   | 50/52 (31-69) <sup>4</sup>     | 0.85        |
| Memory                                | 84/74 (56-94) <sup>1</sup>       | 84/79 (62.5-94) <sup>4</sup>   | 0.59        |
| Emotional                             | 69/70 (64-75) <sup>1</sup>       | 72/70 (56-83) <sup>4</sup>     | 0.72        |
| Communication                         | 79/79 (68-93) <sup>1</sup>       | 86/84 (71-96) <sup>4</sup>     | 0.27        |
| ADL                                   | 69/62.5 (40-83) <sup>1</sup>     | 83/74 (56-94) <sup>4</sup>     | <b>0.03</b> |
| Mobility                              | 77.5/66 (57.5-82.5) <sup>1</sup> | 75/71 (57.5-87.5) <sup>4</sup> | 0.67        |
| Hand function                         | 60/55 (25-80) <sup>1</sup>       | 50/50 (10-85) <sup>4</sup>     | 0.69        |
| Participation                         | 60/62 (56-72)                    | 56/58 (44-67)                  | 0.23        |
| Global Life satisfaction median (IQR) | 4 (3-5)                          | 4 (4-5) <sup>6</sup>           | 0.30        |

---

\*based on Katz Extended Index of ADL <sup>1</sup>n=21, <sup>2</sup>n=39, <sup>3</sup>n=34, <sup>4</sup>n=31, <sup>5</sup>n=32, <sup>6</sup>n=33

Table 2. Characteristics at baseline and at 12 months for the home rehabilitation groups

|                                                                                          | Home CADL group<br>n=13 | Home UADL<br>groupn=25       | p-value     |
|------------------------------------------------------------------------------------------|-------------------------|------------------------------|-------------|
| Age (years) median/mean/ (min-max)                                                       | 77/75 (60-84)           | 70/71 (52-86)                | 0.2         |
| Sex: male/female (n)                                                                     | 7/6                     | 15/10                        | 0.71        |
| Civil status: Living together/living alone (n)                                           | 6/7                     | 14/11                        | 0.56        |
| Education: nine year or less/more than nine year (n)                                     | 5/8                     | 12/13                        | 0.57        |
| <b>Before stroke</b>                                                                     |                         |                              |             |
| Katz Extended Index of ADL median (IQR)                                                  | 10 (7-10)               | 10 (9-10)                    | 0.26        |
| Dependence in ADL*: dependent in P-ADL and I-ADL/dependent in P-ADL or I-ADL/independent | 3/3/7                   | 0/7/18                       | <b>0.04</b> |
| <b>At inclusion in study</b>                                                             |                         |                              |             |
| Stroke severity mild/moderate/severe                                                     | 11/2/0                  | 24/1/0                       | 0.47        |
| Barthel Index median (IQR)                                                               | 85 (60-90)              | 85 (75-95)                   | 0.53        |
| SIS Recovery median (IQR)                                                                | 40 (20-50)              | 50 (30-70)                   | 0.25        |
| <b>At twelve months</b>                                                                  |                         |                              |             |
|                                                                                          | <b>n=12</b>             | <b>n=24</b>                  |             |
| Barthel Index median (IQR)                                                               | 95 (85-100)             | 97.5 (87.5-100)              | 0.5         |
| Katz Index of ADL median (IQR)                                                           | 7 (5-9)                 | 7.5 (5.5-10)                 | 0.48        |
| Stroke Impact Scale median/mean (IQR)                                                    |                         |                              |             |
| Recovery                                                                                 | 70/61 (40-75)           | 70/63 (50-82.5)              | 0.79        |
| Strength                                                                                 | 66/62 (50-78)           | 69/64 (50-87.5) <sup>1</sup> | 0.79        |



|    |                                          |                     |                               |             |
|----|------------------------------------------|---------------------|-------------------------------|-------------|
| 1  |                                          |                     |                               |             |
| 2  |                                          |                     |                               |             |
| 3  | Memory                                   | 80/75 (64-89)       | 87.5/85 (75, 94) <sup>1</sup> | 0.1         |
| 4  |                                          |                     |                               |             |
| 5  | Emotional                                | 69/71 (58-82)       | 67/73 (61-86) <sup>1</sup>    | 0.97        |
| 6  |                                          |                     |                               |             |
| 7  | Communication                            | 73/74 (57-96)       | 93/87 (79-96) <sup>1</sup>    | 0.12        |
| 8  |                                          |                     |                               |             |
| 9  | ADL                                      | 78/74 (65-87.5)     | 90/78 (65-96) <sup>1</sup>    | 0.1         |
| 10 |                                          |                     |                               |             |
| 11 | Mobility                                 | 71/70 (64-79)       | 80/77 (65-95) <sup>1</sup>    | 0.12        |
| 12 |                                          |                     |                               |             |
| 13 | Hand function                            | 52.5/51 (32.5-77.5) | 85/75 (60-95) <sup>1</sup>    | <b>0.01</b> |
| 14 |                                          |                     |                               |             |
| 15 | Participation                            | 64/61 (44-75)       | 74/69 (53-83)                 | 0.26        |
| 16 |                                          |                     |                               |             |
| 17 | Global Life satisfaction median<br>(IQR) | 4 (4-5)             | 4/4 (3-5) <sup>1</sup>        | 0.4         |
| 18 |                                          |                     |                               |             |
| 19 |                                          |                     |                               |             |
| 20 |                                          |                     |                               |             |
| 21 |                                          |                     |                               |             |

---

\* based on Katz Extended Index of ADL, <sup>1</sup>n=23

### Use of health care services

The geriatric CADL group had a shorter LOS at the geriatric rehabilitation unit compared to the geriatric UADL group (median 22.5 days vs 31 days,  $p=0.02$ ), and also a shorter total initial LOS including both the acute stroke unit and the geriatric rehabilitation wards (median 26.5 days vs 36 days,  $p=0.03$ ) (Table 3). In primary care, the geriatric CADL group had more contacts with a physician compared to the geriatric UADL group (median 9.5 contacts vs 7 contacts,  $p=0.02$ ).

The home CADL group had fewer visits to the general outpatient rehabilitation in primary care compared to the home UADL group (median 0 vs 2,  $p=0.04$ ) and, moreover, fewer rehabilitation contacts in primary care when all contacts, including also the contacts with the stroke team, were summed up (median 42 vs 53,  $p=0.03$ ) (Table 4). When all contacts with outpatient care, including both specialized and primary care were summed up, the home CADL group had fewer contacts compared to the home UADL group (median 74 vs 103,  $p=0.01$ ).

Table 3. Use of health care services the first year after stroke for the geriatric CADL group and the geriatric UADL group

|                                                                           | Geriatric CADL group, n=26 |      |        |      |         | Geriatric UADL group, n=46 |      |        |      |         | p-value     |
|---------------------------------------------------------------------------|----------------------------|------|--------|------|---------|----------------------------|------|--------|------|---------|-------------|
|                                                                           | n*                         | Mean | Median | Sum  | Min-max | n*                         | Mean | Median | Sum  | Min-max |             |
| <b>Emergency unit (visits)</b>                                            | 25                         | 1.8  | 1.5    | 48   | 0-5     | 45                         | 2.2  | 2      | 100  | 0-12    | 0.71        |
| <b>INPATIENT CARE</b>                                                     |                            |      |        |      |         |                            |      |        |      |         |             |
| <b>Initial hospitalisation (days)</b>                                     |                            |      |        |      |         |                            |      |        |      |         |             |
| Acute stroke unit                                                         | 26                         | 5.8  | 6      | 152  | 0-10    | 46                         | 9.1  | 5      | 421  | 0-60    | 0.65        |
| Inpatient rehabilitation                                                  | 26                         | 26.6 | 22.5   | 691  | 12-64   | 46                         | 33.9 | 31     | 1560 | 10-71   | <b>0.02</b> |
| <i>Initial stay (i.e. acute stroke unit and inpatient rehabilitation)</i> | 26                         | 32.4 | 26.5   | 843  | 17-73   | 46                         | 43.1 | 36     | 1981 | 13-114  | <b>0.03</b> |
| <b>Recurrent hospitalisation</b>                                          |                            |      |        |      |         |                            |      |        |      |         |             |
| Inpatient care                                                            | 8                          | 4.7  | 0      | 122  | 0-59    | 23                         | 7.5  | 0.5    | 344  | 0-70    | 0.53        |
| Inpatient rehabilitation                                                  | 3                          | 2.6  | 0      | 68   | 0-32    | 7                          | 3.4  | 0      | 155  | 0-49    | 0.8         |
| <b><i>Inpatient care, total</i></b>                                       | 26                         | 39.7 | 29.5   | 1033 | 17-123  | 46                         | 53.9 | 40     | 2480 | 13-156  | <b>0.02</b> |
| <b>OUTPATIENT CARE</b>                                                    |                            |      |        |      |         |                            |      |        |      |         |             |
| <b>Specialised outpatient care</b>                                        |                            |      |        |      |         |                            |      |        |      |         |             |
| Physician, visit                                                          |                            |      |        |      |         |                            |      |        |      |         |             |

1  
2  
3  
4  
5  
6  
7  
8  
9  
10  
11  
12  
13  
14  
15  
16  
17  
18  
19  
20  
21  
22  
23  
24  
25  
26  
27  
28  
29  
30  
31  
32  
33  
34  
35  
36  
37  
38  
39  
40  
41  
42  
43  
44  
45  
46  
47

|                                              |    |      |     |    |     |    |      |   |     |       |              |
|----------------------------------------------|----|------|-----|----|-----|----|------|---|-----|-------|--------------|
| Neurology department                         | 17 | 0.7  | 1   | 18 | 0-2 | 9  | 0.3  | 0 | 12  | 0-2   | <b>0.003</b> |
| Other departments                            | 22 | 2.3  | 1.5 | 59 | 0-7 | 39 | 4.6  | 2 | 214 | 0-49  | 0.19         |
| Physician, telephone                         |    |      |     |    |     |    |      |   |     |       |              |
| Neurology department                         | 2  | 0.1  | 0   | 2  | 0-1 | 2  | 0.1  | 0 | 4   | 0-3   | 0.83         |
| Other departments                            | 2  | 0.1  | 0   | 3  | 0-2 | 3  | 0.1  | 0 | 5   | 0-3   | 0.94         |
| Nurse, visit                                 |    |      |     |    |     |    |      |   |     |       |              |
| Neurology department                         | 8  | 0.4  | 0   | 11 | 0-3 | 1  | 0.02 | 0 | 1   | 0-1   | <b>0.04</b>  |
| Other departments                            | 14 | 1    | 1   | 25 | 0-8 | 15 | 1.5  | 0 | 69  | 0-14  | 0.35         |
| Nurse, telephone                             |    |      |     |    |     |    |      |   |     |       |              |
| Neurology department                         | 1  | 0.04 | 0   | 1  | 0-1 | 2  | 0.04 | 0 | 2   | 0-1   | 0.98         |
| Other departments                            | 1  | 0.04 | 0   | 1  | 0-1 | 1  | 0.06 | 0 | 3   | 0-3   | 0.91         |
| Other (typ fotvård)                          | 6  | 0.6  | 0   | 15 | 0-6 | 14 | 0.9  | 0 | 43  | 0-7   | 0.55         |
| <b>Specialised outpatient rehabilitation</b> |    |      |     |    |     |    |      |   |     |       |              |
| Rehabilitation professionals (visit)         | 0  |      |     |    |     | 13 | 18.3 | 0 | 842 | 0-187 |              |
| Day-hospital rehabilitation (day-visit)      |    |      |     |    |     | 8  | 3.2  | 0 | 146 | 0-28  |              |
| <b>Primary care</b>                          |    |      |     |    |     |    |      |   |     |       |              |
| Rehabilitation                               |    |      |     |    |     |    |      |   |     |       |              |

|    |                                     |    |      |      |     |      |    |      |      |      |       |             |
|----|-------------------------------------|----|------|------|-----|------|----|------|------|------|-------|-------------|
| 1  |                                     |    |      |      |     |      |    |      |      |      |       |             |
| 2  |                                     |    |      |      |     |      |    |      |      |      |       |             |
| 3  |                                     |    |      |      |     |      |    |      |      |      |       |             |
| 4  |                                     |    |      |      |     |      |    |      |      |      |       |             |
| 5  | General rehabilitation , visit      | 12 | 3.8  | 0    | 100 | 0-31 | 19 | 7.6  | 0    | 350  | 0-70  | 0.99        |
| 6  |                                     |    |      |      |     |      |    |      |      |      |       |             |
| 7  | General rehabilitation, home-visit  | 7  | 0.8  | 0    | 22  | 0-12 | 12 | 0.8  | 0    | 35   | 0-9   | 0.97        |
| 8  |                                     |    |      |      |     |      |    |      |      |      |       |             |
| 9  | General rehabilitation, telephone   | 2  | 0.08 | 0    | 2   | 0-1  | 7  | 0.3  | 0    | 12   | 0-3   | 0.57        |
| 10 |                                     |    |      |      |     |      |    |      |      |      |       |             |
| 11 | General rehabilitation, group visit | 8  | 3.5  | 0    | 91  | 0-19 | 12 | 4.7  | 0    | 216  | 0-67  | 0.75        |
| 12 |                                     |    |      |      |     |      |    |      |      |      |       |             |
| 13 | Stroke team, visits                 | 1  | 0.8  | 0    | 21  | 0-21 | 10 | 3.6  | 0    | 164  | 0-61  | 0.22        |
| 14 |                                     |    |      |      |     |      |    |      |      |      |       |             |
| 15 | Stroke team, home visit             | 23 | 21.2 | 15.5 | 550 | 0-87 | 34 | 22.5 | 16   | 1036 | 0-89  | 0.82        |
| 16 |                                     |    |      |      |     |      |    |      |      |      |       |             |
| 17 | Stroke team, telephone              | 1  | 0.2  | 0    | 4   | 0-4  | 12 | 0.4  | 0    | 17   | 0-10  | 0.75        |
| 18 |                                     |    |      |      |     |      |    |      |      |      |       |             |
| 19 | Stroke team, group                  | 1  | 0.04 | 0    | 1   | 0-1  | 4  | 3.3  | 0    | 151  | 0-90  | 0.72        |
| 20 |                                     |    |      |      |     |      |    |      |      |      |       |             |
| 21 | <i>Rehabilitation, total</i>        | 23 | 30.4 | 22.5 | 791 | 0-98 | 37 | 43.1 | 26.5 | 1981 | 0-185 | 0.62        |
| 22 |                                     |    |      |      |     |      |    |      |      |      |       |             |
| 23 | Physician                           |    |      |      |     |      |    |      |      |      |       |             |
| 24 | Visit                               | 23 | 12.8 | 6    | 333 | 0-50 | 42 | 7.7  | 4    | 355  | 0-32  | 0.16        |
| 25 |                                     |    |      |      |     |      |    |      |      |      |       |             |
| 26 | Home visit                          | 12 | 2    | 0    | 51  | 0-10 | 12 | 1.2  | 0    | 56   | 0-16  | 0.15        |
| 27 |                                     |    |      |      |     |      |    |      |      |      |       |             |
| 28 | Stroke team                         | 0  |      |      |     |      | 0  |      |      |      |       |             |
| 29 |                                     |    |      |      |     |      |    |      |      |      |       |             |
| 30 | Telephone                           | 18 | 2.5  | 2    | 65  | 0-15 | 25 | 1.6  | 1    | 76   | 0-13  | 0.17        |
| 31 |                                     |    |      |      |     |      |    |      |      |      |       |             |
| 32 | <i>Physician, total</i>             | 25 | 17.3 | 9.5  | 449 | 0-58 | 43 | 10.6 | 7    | 487  | 0-34  | <b>0.03</b> |
| 33 |                                     |    |      |      |     |      |    |      |      |      |       |             |
| 34 | Nurse                               |    |      |      |     |      |    |      |      |      |       |             |
| 35 | Visit                               | 13 | 3    | 0.5  | 79  | 0-24 | 22 | 3.5  | 0    | 162  | 0-85  | 0.76        |
| 36 |                                     |    |      |      |     |      |    |      |      |      |       |             |
| 37 | Home visit                          | 12 | 9    | 0    | 233 | 0-38 | 17 | 6.9  | 0    | 316  | 0-41  | 0.49        |
| 38 |                                     |    |      |      |     |      |    |      |      |      |       |             |
| 39 |                                     |    |      |      |     |      |    |      |      |      |       |             |
| 40 |                                     |    |      |      |     |      |    |      |      |      |       |             |
| 41 |                                     |    |      |      |     |      |    |      |      |      |       |             |
| 42 |                                     |    |      |      |     |      |    |      |      |      |       |             |
| 43 |                                     |    |      |      |     |      |    |      |      |      |       |             |
| 44 |                                     |    |      |      |     |      |    |      |      |      |       |             |
| 45 |                                     |    |      |      |     |      |    |      |      |      |       |             |
| 46 |                                     |    |      |      |     |      |    |      |      |      |       |             |
| 47 |                                     |    |      |      |     |      |    |      |      |      |       |             |

|                                      |                  |                    |                    |                    |                     |                  |                    |                  |                    |                     |                    |
|--------------------------------------|------------------|--------------------|--------------------|--------------------|---------------------|------------------|--------------------|------------------|--------------------|---------------------|--------------------|
| Stroke team                          | 0                |                    |                    |                    |                     | 0                |                    |                  |                    |                     |                    |
| Telephone                            | 3                | 0.3                | 0                  | 8                  | 0-4                 | 4                | 0.1                | 0                | 5                  | 0-2                 | 0.81               |
| Group                                | 0                |                    |                    |                    |                     | 0                |                    |                  |                    |                     |                    |
| <i>Nurse, total</i>                  | <i>17</i>        | <i>12.3</i>        | <i>4</i>           | <i>320</i>         | <i>0-48</i>         | <i>32</i>        | <i>10.5</i>        | <i>3</i>         | <i>483</i>         | <i>0-116</i>        | <i>0.62</i>        |
| Assistant nurse                      |                  |                    |                    |                    |                     |                  |                    |                  |                    |                     |                    |
| Visit                                | 2                | 0.08               | 0                  | 2                  | 0-1                 | 4                | 0.3                | 0                | 12                 | 0-7                 | 0.93               |
| Home visit                           | 4                | 4.1                | 0                  | 107                | 0-103               | 12               | 4.9                | 0                | 226                | 0-134               | 0.40               |
| Group                                | 0                |                    |                    |                    |                     | 1                | 0.1                | 0                | 4                  | 0-4                 |                    |
| <i>Assistant nurse, total</i>        | <i>4</i>         | <i>4.2</i>         | <i>0</i>           | <i>109</i>         | <i>0-104</i>        | <i>16</i>        | <i>5.3</i>         | <i>0</i>         | <i>242</i>         | <i>0-134</i>        | <i>0.14</i>        |
| <b><i>Outpatient care, total</i></b> | <b><i>26</i></b> | <b><i>69.4</i></b> | <b><i>65.5</i></b> | <b><i>1804</i></b> | <b><i>1-185</i></b> | <b><i>46</i></b> | <b><i>98.6</i></b> | <b><i>74</i></b> | <b><i>4534</i></b> | <b><i>2-316</i></b> | <b><i>0.34</i></b> |

n\* number of people who have used the service

Table 4. Use of health care services the first year after stroke for the home CADL group and the home UADL group

|                                | Home CADL group, n=13 |      |        |     |         | Home UADL group n=25 |      |            |     |             | p-value |
|--------------------------------|-----------------------|------|--------|-----|---------|----------------------|------|------------|-----|-------------|---------|
|                                | n*                    | Mean | Median | Sum | Min-max | n*                   | Mean | Media<br>n | Sum | Min-<br>max |         |
| <b>Emergency unit (visits)</b> | 13                    | 2.1  | 2      | 27  | 1-5     | 24                   | 2    | 2          | 50  | 0-5         | 0.7     |
| <b>INPATIENT CARE (days)</b>   |                       |      |        |     |         |                      |      |            |     |             |         |

1  
2  
3  
4  
5  
6  
7  
8  
9  
10  
11  
12  
13  
14  
15  
16  
17  
18  
19  
20  
21  
22  
23  
24  
25  
26  
27  
28  
29  
30  
31  
32  
33  
34  
35  
36  
37  
38  
39  
40  
41  
42  
43  
44  
45  
46  
47

**Initial hospitalisation**

|                                                                     |           |             |           |            |             |           |             |           |            |             |             |
|---------------------------------------------------------------------|-----------|-------------|-----------|------------|-------------|-----------|-------------|-----------|------------|-------------|-------------|
| Acute stroke unit                                                   | 13        | 7.7         | 6         | 100        | 2-15        | 25        | 9.4         | 9         | 235        | 0-26        | 0.54        |
| Inpatient rehabilitation                                            | 12        | 16          | 20        | 208        | 0-26        | 16        | 15.4        | 13        | 385        | 0-50        | 0.51        |
| <i>Initial stay (i.e. stroke unit and inpatient rehabilitation)</i> | <i>13</i> | <i>23.7</i> | <i>27</i> | <i>308</i> | <i>4-35</i> | <i>25</i> | <i>24.8</i> | <i>26</i> | <i>620</i> | <i>2-55</i> | <i>0.95</i> |

**Recurrent hospitalisation**

|                              |           |             |           |            |             |           |             |           |            |              |            |
|------------------------------|-----------|-------------|-----------|------------|-------------|-----------|-------------|-----------|------------|--------------|------------|
| Inpatient care               | 4         | 1.8         | 0         | 23         | 0-17        | 9         | 4.8         | 0         | 120        | 0-79         | 0.72       |
| Inpatient rehabilitation     | 0         |             |           |            |             | 2         | 0.7         | 0         | 17         | 0-10         | 0.70       |
| <i>Inpatient care, total</i> | <i>13</i> | <i>25.5</i> | <i>28</i> | <i>331</i> | <i>4-45</i> | <i>25</i> | <i>30.3</i> | <i>29</i> | <i>757</i> | <i>2-134</i> | <i>0.7</i> |

**OUTPATIENT CARE (contacts)**

**Specialised outpatient care**

|                      |    |     |   |    |      |    |     |   |     |      |      |
|----------------------|----|-----|---|----|------|----|-----|---|-----|------|------|
| Physician, visit     |    |     |   |    |      |    |     |   |     |      |      |
| Neurology department | 5  | 0.4 | 0 | 5  | 0-1  | 5  | 0.3 | 0 | 7   | 0-2  | 0.45 |
| Other departments    | 10 | 2.3 | 2 | 30 | 0-10 | 21 | 5.6 | 2 | 139 | 0-48 | 0.52 |
| Physician, telephone |    |     |   |    |      |    |     |   |     |      |      |
| Neurology department | 2  | 0.2 | 0 | 2  | 0-1  | 1  | 0.4 | 0 | 1   | 0-1  | 0.58 |
| Other departments    | 3  | 0.2 | 0 | 3  | 0-1  | 9  | 0.6 | 0 | 16  | 0-4  | 0.41 |

Nurse, visit

|    |                                              |    |      |    |     |      |    |      |    |     |       |      |
|----|----------------------------------------------|----|------|----|-----|------|----|------|----|-----|-------|------|
| 1  |                                              |    |      |    |     |      |    |      |    |     |       |      |
| 2  |                                              |    |      |    |     |      |    |      |    |     |       |      |
| 3  |                                              |    |      |    |     |      |    |      |    |     |       |      |
| 4  |                                              |    |      |    |     |      |    |      |    |     |       |      |
| 5  | Neurology department                         | 1  | 0.1  | 0  | 1   | 0-1  | 1  | 0.6  | 0  | 15  | 0-15  | 0.88 |
| 6  | Other departments                            | 5  | 0.4  | 0  | 5   | 0-1  | 11 | 1.2  | 0  | 31  | 0-9   | 0.47 |
| 7  |                                              |    |      |    |     |      |    |      |    |     |       |      |
| 8  | Nurse, telephone                             |    |      |    |     |      |    |      |    |     |       |      |
| 9  |                                              |    |      |    |     |      |    |      |    |     |       |      |
| 10 | Neurology department                         | 0  |      |    |     |      | 1  | 1.2  | 0  | 29  | 0-29  |      |
| 11 | Other departments                            | 1  | 0.1  | 0  | 1   | 0-1  | 6  | 0.4  | 0  | 10  | 0-3   | 0.40 |
| 12 |                                              |    |      |    |     |      |    |      |    |     |       |      |
| 13 | Other                                        | 3  | 1.6  | 0  | 21  | 0-8  | 9  | 0.9  | 0  | 23  | 0-6   | 0.81 |
| 14 |                                              |    |      |    |     |      |    |      |    |     |       |      |
| 15 |                                              |    |      |    |     |      |    |      |    |     |       |      |
| 16 | <b>Specialised outpatient rehabilitation</b> |    |      |    |     |      |    |      |    |     |       |      |
| 17 |                                              |    |      |    |     |      |    |      |    |     |       |      |
| 18 | Rehabilitation professional (visit)          | 0  |      |    |     |      | 8  | 26   | 7  | 649 | 0-126 |      |
| 19 |                                              |    |      |    |     |      |    |      |    |     |       |      |
| 20 | Day-hospital rehabilitation (day-visit)      | 0  |      |    |     |      | 0  |      |    |     |       |      |
| 21 |                                              |    |      |    |     |      |    |      |    |     |       |      |
| 22 |                                              |    |      |    |     |      |    |      |    |     |       |      |
| 23 | <b>Primary care</b>                          |    |      |    |     |      |    |      |    |     |       |      |
| 24 |                                              |    |      |    |     |      |    |      |    |     |       |      |
| 25 | Rehabilitation                               |    |      |    |     |      |    |      |    |     |       |      |
| 26 |                                              |    |      |    |     |      |    |      |    |     |       |      |
| 27 | General rehabilitation, visits to clinic     | 6  | 1.8  | 0  | 24  | 0-13 | 18 | 8    | 2  | 200 | 0-41  | 0.04 |
| 28 |                                              |    |      |    |     |      |    |      |    |     |       |      |
| 29 | General rehabilitation, home-visits          | 3  | 0.6  | 0  | 8   | 0-5  | 7  | 2    | 0  | 50  | 0-20  | 0.68 |
| 30 |                                              |    |      |    |     |      |    |      |    |     |       |      |
| 31 | General rehabilitation, telephone            | 3  | 0.3  | 0  | 4   | 0-2  | 10 | 0.9  | 0  | 22  | 0-3   | 0.27 |
| 32 |                                              |    |      |    |     |      |    |      |    |     |       |      |
| 33 | General rehabilitation, group visit          | 2  | 2.1  | 0  | 28  | 0-20 | 14 | 10   | 1  | 249 | 0-102 | 0.05 |
| 34 |                                              |    |      |    |     |      |    |      |    |     |       |      |
| 35 | Stroke team, visits to clinic                | 5  | 3.7  | 0  | 48  | 0-23 | 1  | 0.1  | 0  | 1   | 0-1   | 0.08 |
| 36 |                                              |    |      |    |     |      |    |      |    |     |       |      |
| 37 | Stroke team, home-visits                     | 13 | 23.6 | 13 | 307 | 5-62 | 25 | 36.9 | 30 | 922 | 5-97  | 0.09 |
| 38 |                                              |    |      |    |     |      |    |      |    |     |       |      |
| 39 |                                              |    |      |    |     |      |    |      |    |     |       |      |
| 40 |                                              |    |      |    |     |      |    |      |    |     |       |      |
| 41 |                                              |    |      |    |     |      |    |      |    |     |       |      |
| 42 |                                              |    |      |    |     |      |    |      |    |     |       |      |
| 43 |                                              |    |      |    |     |      |    |      |    |     |       |      |
| 44 |                                              |    |      |    |     |      |    |      |    |     |       |      |
| 45 |                                              |    |      |    |     |      |    |      |    |     |       |      |
| 46 |                                              |    |      |    |     |      |    |      |    |     |       |      |
| 47 |                                              |    |      |    |     |      |    |      |    |     |       |      |



1  
2  
3  
4  
5  
6  
7  
8  
9  
10  
11  
12  
13  
14  
15  
16  
17  
18  
19  
20  
21  
22  
23  
24  
25  
26  
27  
28  
29  
30  
31  
32  
33  
34  
35  
36  
37  
38  
39  
40  
41  
42  
43  
44  
45  
46  
47

|                              |           |             |           |            |              |           |             |           |             |               |             |  |
|------------------------------|-----------|-------------|-----------|------------|--------------|-----------|-------------|-----------|-------------|---------------|-------------|--|
| Stroke team, telephone       | 5         | 2.6         | 0         | 34         | 0-16         | 0         |             |           |             |               |             |  |
| Stroke team, group visit     | 1         | 0.5         | 0         | 6          | 0-6          | 8         | 0.8         | 0         | 20          | 0-4           | 0.28        |  |
| <i>Rehabilitation, total</i> | <i>13</i> | <i>35.3</i> | <i>42</i> | <i>459</i> | <i>7-63</i>  | <i>25</i> | <i>58.6</i> | <i>53</i> | <i>1464</i> | <i>13-129</i> | <i>0.03</i> |  |
| Physician                    |           |             |           |            |              |           |             |           |             |               |             |  |
| Visit to clinic              | 13        | 10.9        | 7         | 142        | 1-26         | 22        | 5.7         | 4         | 142         | 0-23          | 0.07        |  |
| Home visit                   | 4         | 1.1         | 0         | 14         | 0-7          | 6         | 1.4         | 0         | 34          | 0-9           | 0.86        |  |
| Stroke team                  | 0         |             |           |            |              | 1         | 0.1         | 0         | 1           | 0-1           |             |  |
| Telephone                    | 10        | 2.9         | 2         | 38         | 0-10         | 14        | 1.5         | 1         | 37          | 0-5           | 0.13        |  |
| <i>Physician, total</i>      | <i>13</i> | <i>14.9</i> | <i>10</i> | <i>194</i> | <i>2-31</i>  | <i>24</i> | <i>8.6</i>  | <i>7</i>  | <i>214</i>  | <i>0-24</i>   | <i>0.06</i> |  |
| Nurse                        |           |             |           |            |              |           |             |           |             |               |             |  |
| Visit to clinic              | 9         | 3.4         | 3         | 44         | 0-12         | 12        | 1.2         | 0         | 30          | 0-7           | 0.06        |  |
| Home visits                  | 8         | 11.6        | 1         | 151        | 0-112        | 10        | 28.6        | 0         | 716         | 0-447         | 0.67        |  |
| Stroke team                  | 3         | 0.4         | 0         | 5          | 0-2          |           |             |           |             |               |             |  |
| Telephone                    | 4         | 0.4         | 0         | 5          | 0-2          | 2         | 0.1         | 0         | 2           | 0-1           | 0.25        |  |
| Stroke team telephone        | 1         | 0.1         | 0         | 1          | 0            |           |             |           |             |               |             |  |
| Group                        | 0         |             |           |            |              | 2         | 0.1         | 0         | 3           | 0-2           |             |  |
| <i>Nurse, total</i>          | <i>13</i> | <i>15.8</i> | <i>6</i>  | <i>206</i> | <i>1-115</i> | <i>18</i> | <i>30</i>   | <i>3</i>  | <i>751</i>  | <i>0-447</i>  | <i>0.19</i> |  |
| Assistant nurse              |           |             |           |            |              |           |             |           |             |               |             |  |

|    |                                                 |           |             |           |            |               |           |              |            |             |               |             |
|----|-------------------------------------------------|-----------|-------------|-----------|------------|---------------|-----------|--------------|------------|-------------|---------------|-------------|
| 1  |                                                 |           |             |           |            |               |           |              |            |             |               |             |
| 2  |                                                 |           |             |           |            |               |           |              |            |             |               |             |
| 3  |                                                 |           |             |           |            |               |           |              |            |             |               |             |
| 4  |                                                 |           |             |           |            |               |           |              |            |             |               |             |
| 5  | Visit to clinic                                 | 0         | 0           | 0         | 0          | 0             | 2         | 0.1          | 0          | 3           | 0-2           | 0.7         |
| 6  | Home visit                                      | 4         | 3.3         | 0         | 43         | 0-23          | 4         | 5.3          | 0          | 132         | 0-103         | 0.49        |
| 7  | Group visit                                     | 0         |             |           |            |               | 0         |              |            |             |               |             |
| 8  |                                                 |           |             |           |            |               |           |              |            |             |               |             |
| 9  | Assistant nurse, total                          | 4         | 3.3         | 0         | 43         | 0-23          | 6         | 5.4          | 0          | 135         | 0-103         | 0.68        |
| 10 |                                                 |           |             |           |            |               |           |              |            |             |               |             |
| 11 | <b>Outpatient care, total</b>                   | <b>13</b> | <b>74.6</b> | <b>74</b> | <b>970</b> | <b>11-208</b> | <b>25</b> | <b>139.4</b> | <b>103</b> | <b>3484</b> | <b>18-668</b> | <b>0.01</b> |
| 12 |                                                 |           |             |           |            |               |           |              |            |             |               |             |
| 13 |                                                 |           |             |           |            |               |           |              |            |             |               |             |
| 14 |                                                 |           |             |           |            |               |           |              |            |             |               |             |
| 15 | *number of people who have received the service |           |             |           |            |               |           |              |            |             |               |             |
| 16 |                                                 |           |             |           |            |               |           |              |            |             |               |             |
| 17 |                                                 |           |             |           |            |               |           |              |            |             |               |             |
| 18 |                                                 |           |             |           |            |               |           |              |            |             |               |             |
| 19 |                                                 |           |             |           |            |               |           |              |            |             |               |             |
| 20 |                                                 |           |             |           |            |               |           |              |            |             |               |             |
| 21 |                                                 |           |             |           |            |               |           |              |            |             |               |             |
| 22 |                                                 |           |             |           |            |               |           |              |            |             |               |             |
| 23 |                                                 |           |             |           |            |               |           |              |            |             |               |             |
| 24 |                                                 |           |             |           |            |               |           |              |            |             |               |             |
| 25 |                                                 |           |             |           |            |               |           |              |            |             |               |             |
| 26 |                                                 |           |             |           |            |               |           |              |            |             |               |             |
| 27 |                                                 |           |             |           |            |               |           |              |            |             |               |             |
| 28 |                                                 |           |             |           |            |               |           |              |            |             |               |             |
| 29 |                                                 |           |             |           |            |               |           |              |            |             |               |             |
| 30 |                                                 |           |             |           |            |               |           |              |            |             |               |             |
| 31 |                                                 |           |             |           |            |               |           |              |            |             |               |             |
| 32 |                                                 |           |             |           |            |               |           |              |            |             |               |             |
| 33 |                                                 |           |             |           |            |               |           |              |            |             |               |             |
| 34 |                                                 |           |             |           |            |               |           |              |            |             |               |             |
| 35 |                                                 |           |             |           |            |               |           |              |            |             |               |             |
| 36 |                                                 |           |             |           |            |               |           |              |            |             |               |             |
| 37 |                                                 |           |             |           |            |               |           |              |            |             |               |             |
| 38 |                                                 |           |             |           |            |               |           |              |            |             |               |             |
| 39 |                                                 |           |             |           |            |               |           |              |            |             |               |             |
| 40 |                                                 |           |             |           |            |               |           |              |            |             |               |             |
| 41 |                                                 |           |             |           |            |               |           |              |            |             |               |             |
| 42 |                                                 |           |             |           |            |               |           |              |            |             |               |             |
| 43 |                                                 |           |             |           |            |               |           |              |            |             |               |             |
| 44 |                                                 |           |             |           |            |               |           |              |            |             |               |             |
| 45 |                                                 |           |             |           |            |               |           |              |            |             |               |             |
| 46 |                                                 |           |             |           |            |               |           |              |            |             |               |             |
| 47 |                                                 |           |             |           |            |               |           |              |            |             |               |             |

1  
2  
3  
4  
5  
6  
7 In the geriatric groups, the multiple regression models showed that a higher age and being  
8 female were associated with a shorter initial LOS, whereas a more severe stroke (i.e. a  
9 moderate stroke) was associated with a longer initial LOS (Table 5a). In addition, there was a  
10 significant interaction between age and stroke severity, meaning that the association between  
11 initial LOS and age was different in the stroke severity groups. The association between initial  
12 LOS and age was stronger for participants with moderate stroke compared to milder stroke.  
13 The difference between participants with mild and moderate stroke was dependent on age i.e.  
14 the difference was greater for younger participants compared to older.  
15  
16  
17  
18  
19

20 With regard to inpatient hospital care, i.e. the total LOS during the first year after stroke  
21 (Table 5b), a more severe stroke was associated with a longer LOS, whereas dependence in  
22 both personal-ADL and instrumental-ADL before the stroke was associated with a shorter  
23 LOS. For outpatient rehabilitation and total outpatient contacts, higher age was associated  
24 with fewer contacts (Table 5c, 5d).  
25  
26  
27  
28

29 In the home groups, the multiple regression model showed no associations between the  
30 independent variable or covariates and initial LOS or total LOS. With regard to outpatient  
31 rehabilitation (Table 6a), higher age and a better capacity in ADL according to Barthel Index  
32 at baseline were related to fewer contacts, whereas belonging to the UADL group was  
33 associated with a higher number of contacts.  
34  
35  
36  
37

38 Moreover, an interaction between age and group belonging was also significantly associated  
39 with the number of outpatient rehabilitation contacts, meaning that the association with age  
40 differed between the CADL and UADL groups. In the UADL group, there was a very weak  
41 association between higher age and higher number of contacts, whereas there was an  
42 association between higher age and fewer contacts in the CADL group.  
43  
44  
45  
46

47 For total outpatient care, including both specialized and primary care, belonging to the UADL  
48 group was associated with a higher number of contacts, whereas better capacity in ADL at  
49 baseline and dependence in personal-ADL or instrumental-ADL before the stroke was related  
50 to fewer contacts (Table 6b).  
51  
52  
53

54 Table 5a. Final regression model for the association between the geriatric rehabilitation  
55 group's initial LOS (log-transformed), i.e. the initial episode of care including the acute stroke  
56

unit and inpatient rehabilitation, and the independent variable and co-variates

|                          | Beta-koff | p-value | 95% CI          |
|--------------------------|-----------|---------|-----------------|
| Intercept                | 3.42      | <0.001  | 3.22, 3.62      |
| Age a)                   | -0.01     | 0.05    | -0.02,-0.000006 |
| Groups                   |           |         | -0.07, 0.37     |
| UADL vs CADL             | 0.15      | 0.18    |                 |
| Stroke severity b)       |           |         |                 |
| Moderate vs Mild         | 0.55      | <0.001  | 0.3, 0.79       |
| Sex                      |           |         |                 |
| Female vs Male           | -0.26     | 0.01    | -0.46, -0.05    |
| Age x stroke severity c) | -0.03     | 0.03    | -0.06, -0.002   |

R<sup>2</sup>=0.28

a) Patients with mild stroke severity

b) Beta-koff at mean age

c) Patients with moderate severity, beta-koff= -0.03+(-0.01)= -0.04

Table 5b. Final regression model for the association between the geriatric rehabilitation group's *total LOS* (log-transformed), including all inpatient care 0–12 months, and the independent variable and co-variates

|                                                                                                             | Beta-koff | p-value | 95% CI        |
|-------------------------------------------------------------------------------------------------------------|-----------|---------|---------------|
| Intercept                                                                                                   | 3.57      | <0.001  | 3.33, 3.81    |
| Groups                                                                                                      |           |         |               |
| UADL vs CADL                                                                                                | 0.14      | 0.31    | -0.13, 0.42   |
| Independence before stroke<br>(Katz Extended Index of ADL)<br>before stroke;                                |           |         |               |
| Dependent in personal-ADL<br>or instrumental-ADL vs<br>Independent in personal-ADL<br>and instrumental-ADL  | -0.11     | 0.44    | -0.4, 0.18    |
| Dependent in personal-ADL<br>and instrumental-ADL vs<br>Independent in personal-ADL<br>and instrumental-ADL | -0.43     | 0.047   | -0.88, -0.004 |

## Stroke severity b)

|                          |       |        |             |
|--------------------------|-------|--------|-------------|
| Moderate vs Mild         | 0.47  | <0.001 | 0.2, 0.74   |
| Age a)                   | -0.01 | 0.13   | -0.2, -0.13 |
| Age x stroke severity c) | -0.02 | 0.17   | -0.17, 12   |

---

 $R^2=0.22$ 

a) patients with mild stroke severity

b) beta-koff at mean age

c) patients with moderate severity, beta-koff=  $-0.02+(-0.01)=-0.03$ 

Table 5c. Final regression model for the association between the geriatric rehabilitation group's *outpatient rehabilitation* (square root transformed), including all contacts with outpatient rehabilitation services 0–12 months, and the independent variable and co-variates

|           | Beta-koff | p-value | 95% CI        |
|-----------|-----------|---------|---------------|
| Intercept | 12.51     | <0.001  | 6.64, 18.37   |
| Age       | -0.09     | 0.029   | -0.17, -0.009 |

---

 $R^2=0.09$ 

Table 5d. Final regression model for the association between geriatric rehabilitation group's *total outpatient* (square root transformed), including all contacts with outpatient health care services 0–12 months including all inpatient care 0–12 months, and the independent variable and co-variates

|           | Beta-koff | p-value | 95% CI       |
|-----------|-----------|---------|--------------|
| Intercept | 16.47     | <0.001  | 10.91, 22.05 |
| Age       | -0.11     | 0.005   | -0.19, -0.03 |

---

 $R^2=0.09$ 

Table 6a. Final regression model for the association between the home rehabilitation group's *outpatient rehabilitation* (log-transformed), including all contacts with outpatient rehabilitation services 0–12 months, and the independent variable and co-variates

---

|                           | Beta-koff | p-value | 95% CI        |
|---------------------------|-----------|---------|---------------|
| Intercept                 | 5         |         |               |
| Age a)                    | -0.072    | 0.004   | -0.11, -0.02  |
| Groups b)                 |           |         |               |
| UADL vs CADL              | 0.75      | 0.003   | 0.28, 1.22    |
| Age x Group c)            | 0.074     | 0.006   | 0.02, 0.12    |
| ADL score (Barthel Index) | -0.01     | 0.003   | -0.03, -0.006 |

R<sup>2</sup>=0.49

a) patients in group CADL

b) beta-koff at mean age

c) patients in group UADL , beta-koff= 0.074+(-0.072)= 0.002

Table 6b. Final regression model for the association between the home rehabilitation group's *total outpatient* (log-transformed), including all contacts with outpatient health care services 0–12 months including all inpatient care 0–12 months, and the independent variable and co-variates

|                                                                                                             | Beta-koff | p-value | 95% CI       |
|-------------------------------------------------------------------------------------------------------------|-----------|---------|--------------|
| Intercept                                                                                                   | 6.57      |         |              |
| ADL score (Barthel Index)                                                                                   | -0.03     | <0.001  | -0.04, -0.02 |
| Group                                                                                                       |           |         |              |
| UADL vs CADL                                                                                                | 0.47      | 0.01    | 0.09, 0.84   |
| Independence before stroke<br>(Katz Extended Index of ADL)<br>before stroke;                                |           |         |              |
| Dependent in personal-ADL<br>or instrumental-ADL vs<br>Independent in personal-ADL<br>and instrumental-ADL  | -0.62     | 0.001   | -0.99, -0.26 |
| Dependent in personal-ADL<br>and instrumental-ADL vs<br>Independent in personal-ADL<br>and instrumental-ADL | -0.53     | 0.16    | -1.28, 0.22  |

R<sup>2</sup>=0.56

## DISCUSSION

Implementation of client-centred care and rehabilitation is supported by stakeholders in Sweden<sup>25</sup> and internationally<sup>5</sup> as a way of addressing challenges in the health care system including an aging population and rising costs. It is consequently important to evaluate the impact of client-centred care on the use of health care services. This study is, to our knowledge, the first in which the total use of health care services has been compared, and the findings suggest that receiving a client-centred occupational therapy intervention does not appear to increase the total use of health care services during the first year after a stroke.

The findings in the present study showed that delivery of client-centred occupational therapy ADL interventions did not appear to increase the LOS in hospital or the number of rehabilitation or other health care contacts with outpatient care during the first year after stroke. Rather, results from multiple regression analyses suggest that clients who did not receive client-centred occupational therapy in their homes had a higher number of outpatient rehabilitation contacts and higher total number of outpatient contacts compared to clients who received CADL as home rehabilitation. Albeit, no such differences between the geriatric groups were found. Comparisons with previous studies are difficult, since interventions described as client- or person-centred care vary considerably<sup>26,27</sup>. Fears of client-centred care being a time-consuming enterprise have been put forward<sup>9,28</sup>. In the present study, the mean number of contacts with the OTs during the intervention period was 21.9 in the CADL group compared to 15.7 in the UADL group<sup>15</sup>, but we do not have data on the length of each contact. The higher number of contacts might reflect that the development of a partnership/relation between the health professionals and the client, a key component in a client-centred approach, might be more time-consuming than the usual care. On the other hand, health care services that take their departures from the prioritized needs, builds on the person's own ability to handle challenges of everyday life and have a problem-solving approach could be expected to reduce health care use in the longer term. In line with this, some studies suggest that a person-centred<sup>12</sup> or integrated care<sup>13</sup> might contribute to a shorter LOS or lower hospitalization rate<sup>29</sup>. However, these studies include only the specific health care service that has been client- or person-centred and not the total use of health care services, and none of these focused on people with stroke. As a shortened LOS could potentially increase the use of e.g. primary care, it is imperative and it is in line with this study, to capture the total use of health care services for a more extended time after the intervention.

1  
2  
3 Previous studies on client centered ADL interventions have shown that participants who  
4 received client centered ADL interventions were to a larger extent participating in goal-  
5 setting, planning for how the goals could be reached and follow-up of goals compared to  
6 those who received ADL as usual<sup>18</sup>. Moreover, they experienced that the intervention enabled  
7 their agency of their own rehabilitation process<sup>30</sup>. This suggests that the effect of the CADL  
8 intervention on healthcare usage might be related to a changed healthcare seeking behavior of  
9 an activated patient. Similar results have also been found in other settings, showing an inverse  
10 association between patient activation (knowledge, skills and confidence) and healthcare  
11 usage, i.e. patients with higher levels of activation had lower healthcare usage<sup>31</sup>. In the  
12 present study, we can only ascertain that the OTs delivered a client-centered service. As  
13 rehabilitation after stroke should be team based<sup>32-34</sup> and the occupational therapist is only one  
14 among several professions in the team, it might be questioned to what extent the care and  
15 rehabilitation as a whole was client-centred. In order to provide client-centred care and  
16 rehabilitation, embracing all the clients' needs, priorities and values, future interventions  
17 should involve the entire team in a shared approach to explore how such a team-based  
18 intervention could effect healthcare usage.  
19  
20  
21  
22  
23  
24  
25  
26  
27  
28

29 In addition to the main results in the study, in four of the eight models the findings showed  
30 associations between higher age and a lower use of health care services; both LOS during the  
31 initial episode of care and contacts with outpatient rehabilitation services and total outpatient  
32 health care contacts. Previous studies have reported similar findings from Sweden<sup>35</sup> and 10  
33 European countries<sup>36</sup>, whereas an American and a Danish study report more similar use<sup>37 38</sup>.  
34 Another difference in resource use was that women appeared to receive shorter initial LOS at  
35 the stroke unit and in inpatient geriatric rehabilitation after a stroke. These findings suggest an  
36 inequity in resource use based on age and sex, and should be further investigated and  
37 followed closely.  
38  
39  
40  
41  
42  
43  
44

45 A strength of the present study is its use of computerized data on the use of health care  
46 services as recall bias is eliminated. Furthermore, we conducted the analyses separately for  
47 the two groups of clients – those included at the geriatric rehabilitation ward and those  
48 included at units that provided home rehabilitation – as there might be different patterns in the  
49 use of health care services depending on how the rehabilitation is organized<sup>39 40</sup>. However,  
50 this entails that the groups were quite small, and the ability to identify differences that are  
51 small but of clinical relevance were limited. Another strength is that the comparison between  
52  
53  
54  
55  
56  
57  
58  
59  
60



CADL and UADL were adjusted for other variables that might influence the resource use of health care services.

We conclude that the provision of a client-centred occupational therapy ADL interventions after stroke did not appear to prolong the LOS, nor did it increase the number of contacts with outpatient health care services during the first year after stroke. Client-centred services may thus be implemented even though more evidence on the effect on client and family outcomes and resource use is warranted.

### **ETHICAL PPROVAL**

The Regional Ethical Review Board in Stockholm approved the study. Registration Clinical Trials gov. identifier: NCT0 1417585.

### **FUNDING STATEMENT**

Supported by grants provided by the Stockholm County Council (ALF project) number 20080156 and 20100107, Swedish Research Council project number 2010-2943, The Swedish Stroke Association, and Doctoral School in Health Care Sciences at Karolinska Institutet.

Role of funders: The funders neither have had nor will have any role in study design, data collection and analysis, decision to publish or preparation of the manuscript.

**COMPETING INTEREST:** None declared

**DATA SHARING STATEMENT:** Data set is available on request

### **AUTHORS CONTRIBUTIONS:**

MT made direct and substantial contribution to this work by having a leading role in analyses, interpretation of data and drafting of the work. MF, CY, GE, SG and KT made direct and substantial contribution to the work by contributing to the design of the work acquisition of data, drafting of the article and by providing critical revisions important for the intellectual content. LvK is the principal investigator and made direct and substantial contribution by having a leading role in the conception and design of the work acquisition and has contributed in analysis, interpretation of data and drafting of the work and by providing critical revisions important for the intellectual content. All the authors have read and approved the final version of the manuscript.

## REFERENCES

1. Law M, Baptiste S, Mills J. Client-centred practice: what does it mean and does it make a difference? *Can J Occup Ther* 1995; 62: 250-7.
2. Leplege A, Gzil F, Cammelli M, et al. Person-centredness: conceptual and historical perspectives. *Disabil Rehabil* 2007; 29: 1555-65.
3. Sugavanam T, Mead G, Bulley C, et al. The effects and experiences of goal setting in stroke rehabilitation - a systematic review. *Disabil Rehabil* 2013; 35: 177-90.
4. Rosewilliam S, Roskell CA, Pandyan AD. A systematic review and synthesis of the quantitative and qualitative evidence behind patient-centred goal setting in stroke rehabilitation. *Clin Rehabil* 2011; 25: 501-14.
5. Institute of Medicine. Crossing the Quality Chasm: A New Health System for the 21st Century. 2001.
6. Arah OA, Westert GP, Hurst J, et al. A conceptual framework for the OECD Health Care Quality Indicators Project. *Int J Qual Health Care* 2006; 18 Suppl 1: 5-13.
7. Myndigheten för vårdanalys. [the Swedish Agency for Health and Care Services Analysis] Vården ur patienternas perspektiv - jämförelser mellan Sverige och 10 andra länder. [Health care services from the patients' perspective – comparisons between Sweden and 10 other countries.] 2014. <http://www.vardanalys.se/wp-content/uploads/2017/12/2014-11-V%C3%A5rden-ur-patienternas-perspektiv.pdf> (accessed 21 January 2018)
8. Plant SE, Tyson SF, Kirk S, et al. What are the barriers and facilitators to goal-setting during rehabilitation for stroke and other acquired brain injuries? A systematic review and meta-synthesis. *Clin Rehabil* 2016; 30: 921-30.
9. Moore L, Britten N, Lydahl D, et al. Barriers and facilitators to the implementation of person-centred care in different healthcare contexts. *Scand J Caring Sci* 2016.
10. Swedish Health and Medical Service Act (1982:763).
11. Hansen LO, Young RS, Hinami K, et al. Interventions to reduce 30-day rehospitalization: a systematic review. *Ann Intern Med* 2011; 155: 520-8.
12. Ekman I, Wolf A, Olsson LE, et al. Effects of person-centred care in patients with chronic heart failure: the PCC-HF study. *Eur Heart J* 2012; 33: 1112-9.
13. Olsson LE, Karlsson J, Ekman I. The integrated care pathway reduced the number of hospital days by half: a prospective comparative study of patients with acute hip fracture. *J Orthop Surg Res* 2006; 1: 3.
14. Leppin AL, Gionfriddo MR, Kessler M, et al. Preventing 30-day hospital readmissions: a systematic review and meta-analysis of randomized trials. *JAMA Intern Med* 2014; 174: 1095-107.
15. Bertilsson AS, Ranner M, von Koch L, et al. A client-centred ADL intervention: three-month follow-up of a randomized controlled trial. *Scand J Occup Ther* 2014; 21: 377-91.

16. Guidetti S, Ranner M, Tham K, et al. A "client-centred activities of daily living" intervention for persons with stroke: One-year follow-up of a randomized controlled trial. *J Rehabil Med* 2015; 47: 605-11.
17. Sonn U, Asberg KH. Assessment of activities of daily living in the elderly. A study of a population of 76-year-olds in Gothenburg, Sweden. *Scand J Rehabil Med* 1991; 23: 193-202.
18. Flink M, Bertilsson AS, Johansson U, et al. Training in client-centeredness enhances occupational therapist documentation on goal setting and client participation in goal setting in the medical records of people with stroke. *Clin Rehabil* 2015; 8: 0269215515620256.
19. Mahoney FI, Barthel DW. Functional Evaluation: The Barther Index. *Md State Med J* 1965; 14: 61-5.
20. Govan L, Langhorne P, Weir CJ. Categorizing stroke prognosis using different stroke scales. *Stroke* 2009; 40: 3396-9.
21. Duncan PW, Bode RK, Min Lai S, et al. Rasch analysis of a new stroke-specific outcome scale: the Stroke Impact Scale. *Arch Phys Med Rehabil* 2003; 84: 950-63.
22. Viitanen M, Fugl-Meyer KS, Bernspang B, et al. Life satisfaction in long-term survivors after stroke. *Scand J Rehabil Med* 1988; 20: 17-24.
23. Guidetti S, Asaba E, Tham K. Meaning of context in recapturing self-care after stroke or spinal cord injury. *Am J Occup Ther* 2009;63(3):323-32.
24. Guidetti S, Asaba E, Tham K. The lived experience of recapturing self-care. *Am J Occup Ther* 2007;61(3):303-10.
25. Swedish Association of Local Authorities and Regions. Government document. <https://skl.se/download/18.85439e61506cc4d3a2765a5/1445863105802/Motion+61+Personcentrerad+v%C3%A5rd.pdf> (accessed 21 January 2018).
26. McMillan SS, Kendall E, Sav A, et al. Patient-centered approaches to health care: a systematic review of randomized controlled trials. *Med Care Res Rev* 2013; 70: 567-96.
27. Olsson LE, Jakobsson Ung E, et al. Efficacy of person-centred care as an intervention in controlled trials - a systematic review. *J Clin Nurs* 2013; 22: 456-65.
28. Naldemirci O, Wolf A, Elam M, et al. Deliberate and emergent strategies for implementing person-centred care: a qualitative interview study with researchers, professionals and patients. *BMC Health Serv Res* 2017; 17: 527.
29. Casas A, Troosters T, Garcia-Aymerich J, et al. Integrated care prevents hospitalisations for exacerbations in COPD patients. *Eur Respir J* 2006; 28: 123-30.
30. Ranner M. Evaluation and experiences of a client-centred ADL intervention after stroke. [Doctoral thesis]: Karolinska Institutet; 2016.
31. Kinney RL, Lemon SC, Person SD, et al. The association between patient activation and medication adherence, hospitalization, and emergency room utilization in patients with chronic illnesses: a systematic review. *Patient Educ Couns* 2015; 98: 545-52.
32. Langhorne P, Bernhardt J, Kwakkel G. Stroke rehabilitation. *Lancet* 2011; 377: 1693-702.

- 1  
2  
3 33. Langhorne P, Pollock A. What are the components of effective stroke unit care? *Age*  
4 *Ageing* 2002; 31: 365-71.
- 5  
6 34. Fisher RJ, Gaynor C, Kerr M, et al. A consensus on stroke: early supported discharge.  
7 *Stroke* 2011; 42: 1392-7.
- 8  
9 35. Palmcrantz S, Holmqvist LW, Sommerfeld DK, et al. Differences between younger and  
10 older individuals in their use of care and rehabilitation but not in self-perceived global  
11 recovery 1 year after stroke. *J Neurol Sci* 2012; 321: 29-34.
- 12  
13 36. Bhalla A, Grieve R, Tilling K, et al. Older stroke patients in Europe: stroke care and  
14 determinants of outcome. *Age Ageing* 2004; 33: 618-24.
- 15  
16 37. Palnum KD, Petersen P, Sorensen HT, et al. Older patients with acute stroke in Denmark:  
17 quality of care and short-term mortality. A nationwide follow-up study. *Age Ageing* 2008; 37:  
18 90-5.
- 19  
20 38. Fonarow GC, Reeves MJ, Zhao X, et al. Age-related differences in characteristics,  
21 performance measures, treatment trends, and outcomes in patients with ischemic stroke.  
22 *Circulation* 2010; 121: 879-91.
- 23  
24 39. Fearon P, Langhorne P, Early Supported Discharge T. Services for reducing duration of  
25 hospital care for acute stroke patients. 2012; 9: CD000443.
- 26  
27 40. Tistad M, von Koch L. Usual Clinical Practice for Early Supported Discharge after Stroke  
28 with Continued Rehabilitation at Home: An Observational Comparative Study. *PloS one*  
29 2015; 10: e0133536.
- 30  
31  
32  
33  
34  
35  
36  
37  
38  
39  
40  
41  
42  
43  
44  
45  
46  
47  
48  
49  
50  
51  
52  
53  
54  
55  
56  
57  
58  
59  
60

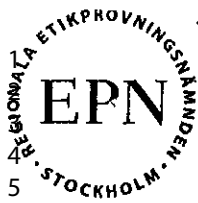

## PROTOKOLL 2009/1:5

2009-05-18

Sammanträde i Stockholm

### 7 Avdelning 1

#### Ordförande

Olof Forssberg

#### Ledamöter med vetenskaplig kompetens

Pierre Lafolie, vetenskaplig sekreterare (*klinisk farmakologi*)

Milita Crisby (*geriatrik, neurologi*)

Elisabeth Faxelid (*vårdvetenskap*)

Kristina Gemzell Danielsson (*kvinnosjukdomar*), *deltar inte i ärende 2009/500*

Christina Hultman (*psykiatri, epidemiologi*)

Göran Elinder (*barnmedicin*), *deltar inte i ärende 2009/737 på grund av jäv*

Bernt Lindelöf (*hudsjukdomar*)

Sven Lindskog (*odontologi*)

Anette von Rosen (*kirurgi*)

#### Ledamöter som företräder allmänna intressen

Majvi Andersson

Elisabeth Dingertz

Stig Nyman

Stig Johnell

Åsa Öckerman

#### Övriga

Camilla Wiberg, *administrativ sekreterare*

§ 1 Ordföranden förklarar sammanträdet öppnat.

§ 2 Den administrativa sekreteraren anmäler att den vetenskaplige sekreteraren sedan föregående möte den 22 april 2009 fattat beslut i 14 ärenden som avser ändring av godkännande.

§ 3 Ansökningar om etisk granskning av forskningsprojekt, se **Bilaga**.

§ 4 Ordföranden meddelar att nästa sammanträde i avdelning 1 äger rum onsdagen den 17 juni 2009.

§ 5 Ordföranden förklarar mötet avslutat.

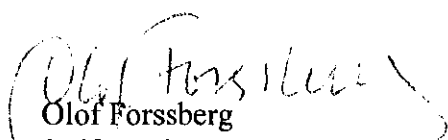  
Olof Forssberg  
Ordförande

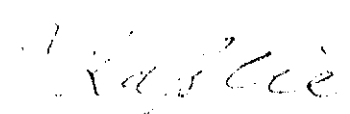  
Pierre Lafolie  
Protokollförare

Protokoll 2009/1:5

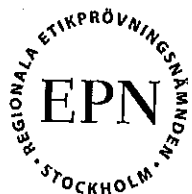

Utdrag ur protokollet från sammanträdet den 18 maj 2009 i avdelning 1.

2009/727-31  
Milita Crisby

**Sökande:** Karolinska Institutet  
**Behörig företrädare:** Kerstin Tham  
**Projekt:** En randomiserad kontrollerad multicenterstudie av en klientcentrerad ADL-intervention för personer med stroke  
**Forskare som genomför projektet:** Lena von Koch

### BESLUT

Nämnden begär att sökanden kompletterar ärendet enligt följande.

1. Samtycket från de anhöriga är oklart formulerat. Förtydliga om de ska medverka som forskningspersoner eller bara delta som observatörer av patienten?
2. Vad innebär den nya ADL-behandlingen?
3. Forskningspersonsinformationerna måste kompletteras med informerat samtycke från forskningspersonerna till behandling av känsliga personuppgifter (se förslag till information i underbilaga 1).

Begärda kompletteringar ska i ett exemplar ha kommit in till nämnden senast den 15 juni 2009. Efter den tidpunkten kommer ärendet att tas upp till prövning i befintligt skick.

Nämnden lämnar över åt den vetenskaplige sekreteraren att avgöra ärendet sedan kompletteringarna gjorts.

58 Beslutet expedierat till behörig företrädare.

59 Kopia för kännedom till ansvarig forskare.

60 Att utdraget överensstämmer med originalet intygar:

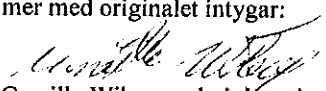  
Camilla Wiberg, administrativ sekreterare /exp 2009-05-28

*Underbilaga 1*

1  
2  
3  
4 Samtycke till behandling av känsliga personuppgifter ska föregås av information om  
5

- 6 • vem som är personuppgiftsansvarig (organisation/huvudman i Sverige),  
7
- 8 • ändamålen med behandlingen av personuppgifterna,  
9
- 10 • all övrig information som behövs för att den registrerade ska kunna ta till vara sina rättigheter i  
11 samband med behandlingen såsom uppgift om mottagarna av personuppgifterna, om vilka upp-  
12 gifter som behandlas samt om rätten att ansöka om information (s.k. registerutdrag) och få rät-  
13 telse av eventuellt felaktiga personuppgifter.  
14  
15  
16  
17  
18  
19  
20  
21  
22  
23  
24  
25  
26  
27  
28  
29  
30  
31  
32  
33  
34  
35  
36  
37  
38  
39  
40  
41  
42  
43  
44  
45  
46  
47  
48  
49  
50  
51  
52  
53  
54  
55  
56  
57  
58  
59  
60

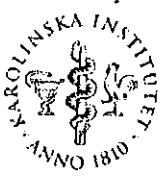

**Karolinska  
Institutet**

090609

Page: 1 / 1

Institutionen för neurobiologi,  
vårdvetenskap och samhälle  
Sektionen för arbetsterapi  
Lena von Koch, docent,  
universitetslektor

Regionala  
Etikprövningsnämnden i Stockholm  
Stockholm

2009-06-11

Dnr: 2009/727-31  
Bundl:

Kompletterande skrivelse avseende ansökan: 2009/727-31

Enligt etikprövningsnämndens protokoll 2009/1:5 görs här en komplettering med förtydliganden till ansökan rörande projektet *En randomiserad kontrollerad multicenterstudie av en klientcentrerad ADL-intervention för personer med stroke*.

1. Samtycket från de anhöriga inhämtas enligt närståendeinformation (v.g.se bilaga 1). Närstående tillfrågas om medverkan som forskningspersoner.
2. Den nya ADL-behandlingen tydliggörs i bilaga 2.
3. Forskningspersonsinformation har kompletterats med information om behandling av känsliga personuppgifter. Det tredje stycket i forskningspersonsinformation har kompletterats. Den kompletterade informationen bilägges (bilaga 3)

Ansvarig forskare: Lena von Koch, universitetslektor, bitr. sektionschef

**GODKÄNNES Dat.**

2009-06-11

Pierre Lafolie  
Regionala etikprövningsnämnden  
i Stockholm

Kopians överensstämmelse  
med originalet intygas:

Postal address

Karolinska Institutet, Department of  
Neurobiology, Caring Sciences and

Visiting address

Alfred Nobels Allé 23, 4 th floor  
SE-141 83 Stockholm

Telephone

switch +46 8524 800 00  
direct +46 8 524 83771

E-Mail

gunilla.eriksson@ki.se



## En studie om rehabilitering efter stroke: Utvärdering av ADL-träning

Tidigare studier har visat att personer som har insjuknat i stroke ofta upplever ett behov av uppföljande rehabilitering och att deras nära anhöriga ofta upplever ett behov av stöd i vardagens aktiviteter. För att kunna utveckla rehabilitering och stöd behövs mer kunskap om vilken effekt olika rehabiliteringsinsatser har på patienters och närståendes vardagsliv. I denna studie utvärderas två olika metoder för ADL-träning. ADL-träning innebär att patienten tränar upp sin förmåga att utföra aktiviteter i det dagliga livet såsom att klä på sig, duscha, laga eller värma mat etc. Syftet med träningen är att patienten ska bli självständig och oberoende av assistans, vilket förhoppningsvis kan minska närstående personers upplevelse av börda i vardagens aktiviteter. Vi är därför också intresserade av att ta del av närståendes erfarenheter av och uppfattningar om rehabiliteringen och om situationen i vardagslivet.

Du som är tillfrågad och har intresse av att delta i denna studie kommer att bli kontaktad om 3, 6 och 12 månader och intervjuad av en legitimerad arbetsterapeut. Vid varje tillfälle kommer du att bli ombedd att besvara frågor som berör om du behöver ge din närstående hjälp, och i så fall med vad och i vilken utsträckning, samt hur du upplever detta. Du kommer också att få frågor om dina egna vardagsaktiviteter. Du blir kontaktad per telefon och väljer själv var och när du önskar träffa arbetsterapeuten för intervju.

Den data som samlas läggs in i en databas för statistisk analys och bearbetning av ansvariga forskare. All data avidentifieras vilket innebär att ditt namn ej kommer att finnas med på dokumenten och vi redovisar ingen personlig information som kan röja din identitet. Alla dokument förvaras som journalhandlingar, dvs i låsta utrymmen på Karolinska Institutet. Du har rätt till att få information om vilka personuppgifter som finns registrerade i databasen, och ev. korrigera felaktigheter. Ditt deltagande är helt frivilligt och du kan när som helst, utan närmare förklaring och utan att det påverkar din närståendes behandling, avbryta ditt deltagande i studien. Du är välkommen att kontakta oss om du önskar ytterligare information:

Projektansvarig: Lena von Koch, docent, Karolinska Institutet, Institutionen för neurobiologi, vårdvetenskap och samhälle, Sektionen för arbetsterapi. 08-524 83 555

Medansvariga forskare;

*Stockholm:* Susanne Guidetti, leg. arbetsterapeut, med dr, Arbetsterapikliniken, Karolinska Universitetssjukhuset. Tel: 0739-66 16 36

*Uppsala:* Gunilla Eriksson, leg. arbetsterapeut, med dr, VO Arbetsterapi, Akademiska sjukhuset. Tel: 0702-21 69 24

*Gävle/Sandviken:* Ulla Johansson, leg arbetsterapeut, med dr, Rehabiliteringsmedicinska kliniken, Sandvikens sjukhus. Tel: 070-25 83 393

## Bilaga 2

### **Klientcentrerad ADL-intervention**

Deltagarna i interventionsgruppen kommer att erhålla en klientcentrerad ADL-intervention (ADL=activities of daily living). Interventionen genomförs av arbetsterapeuter som deltagit i en 5-dagarskurs och som är anställda vid någon av de rehabiliteringskliniker eller hemrehabiliteringsteam som är involverade i projektet. Omfattningen av den totala rehabiliteringen (10 tillfällen X 45 min, som påbörjas 1-2 veckor efter insjuknandet i stroke och pågår under 2-3 veckor) kommer inte att överstiga ordinarie rehabilitering (ca 1,5 –2 timmar/dag av arbetsterapeut och sjukgymnast).

ADL-interventionen är klientcentrerad dvs. träningen är anpassad till individens möjligheter, motivation, uppfattningar och behov, och är utformad i ett nära samarbete mellan arbetsterapeut (AT) och patient i linje med vad som framkommit i tidigare studier (Guidetti & Tham, 2003; Guidetti, Asaba & Tham, 2007; Guidetti, Asaba & Tham, 2009). Nära anhöriga/närstående kommer att bjudas in att delta i träningen. Olika interventionsstrategier används för att möjliggöra medvetenhet om förmåga/oförmåga (Tham et al, 2000; Tham et al, 2001), för att hitta nya vägar (kompensation) att utföra ADL och/eller modifiera miljöns krav för att kunna utföra aktiviteten (Guidetti & Tham, 2007).

Den klientcentrerade ADL-interventionen inleds med en observationsbedömning av ADL-förmåga där patient, ev närstående och arbetsterapeut tillsammans fyller i ADL-bedömningen. Därefter identifierar patienten aktiviteter han/hon vill och behöver klara av att utföra, i enlighet med Canadian Occupational Performance Measure (COPM), och formulerar 3 mål för träningen (Law et al, 1998).

Patienten lär sig sedan en global problemlösningsstrategi (goal-plan-do-check) för att kunna lösa olika sorters problem under utförandet av ADL (Polatajko, 2001). Nästa steg är att utföra en av de valda aktiviteterna och upptäcka och identifiera strategier för att kunna utföra aktiviteten. Patienten planerar och prövar nya strategier i sitt aktivitetsutförande tills målet är nått i den första aktiviteten. De fortsätter sedan sin träning genom att använda den globala problemlösningsstrategin i nya valda aktiviteter. Vid det sista tillfället utvärderar och diskuterar arbetsterapeuten och patienten tillsammans alla de strategier som använts under den klientcentrerade interventionen. Detta görs för att stödja patienten i "transfer of learning" dvs. överförande av problemlösningsstrategierna i nya aktiviteter på egen hand (Polatajko et al, 2001).

1  
2  
3  
4  
5  
6  
7  
8  
9  
10  
11  
12  
13  
14  
15  
16  
17  
18  
19  
20  
21  
22  
23  
24  
25  
26  
27  
28  
29  
30  
31  
32  
33  
34  
35  
36  
37  
38  
39  
40  
41  
42  
43  
44  
45  
46  
47  
48  
49  
50  
51  
52  
53  
54  
55  
56  
57  
58  
59  
60

### De olika stegen i den klientcentrerade ADL-interventionen

- 1) Första mötet
- 2) ADL bedömning med observation i personlig vård
- 3) Fyll i bedömning tillsammans med patienten, ev närstående
- 4) Arbeta utifrån MÅL-PLANERA-TRÄNA-STÄMMA AV
- 5) Formulera 3 delmål- utifrån "deras livsvärld just nu" fokusera på P-ADL-förmåga
- 6) Träningsdagbok. Tid/mål/syfte
- 7) Informera klientens Team på avdelningen
- 8) Genomföra träning med strategier från studie 1, 2 och 3, MÅL-PLANERA-TRÄNA-STÄMMA AV och teoretiska referensramar såsom klientcentrering.
- 9) Utvärdera tillsammans med klient och ev närstående och ev omformulera mål.

## Begäran om samtycke till behandling av personuppgifter

Namn:

Adress:

Du har samtyckt till att medverka i studien "En randomiserad kontrollerad multicenterstudie av en klientcentrerad ADL-intervention för personer med stroke". Det innebär bl a att vi kommer att upprätta ett dataregister med dina och andra deltagares personuppgifter. Ansvarig för det registret är Karolinska Institutet, 171 77 STOCKHOLM, tfn 08-524 80000. Kontaktperson där är Lena von Koch tfn 08- 524 835 55

Ändamålet med den behandling av personuppgifter vi avser att utföra är att registrera uppgifter om din sjukdom och konsekvenserna av stroke för dig i ditt vardagsliv, för att kunna statistiskt bearbeta och analysera uppgifter från alla som deltar i studien. För detta behöver vi även få ditt tillstånd att inhämta uppgifter från din medicinska journal samt från kommunens register över den service de ev har givit dig i form av t ex hemtjänst.

Förutom forskarna som ingår i projektet kommer inte någon att kunna se dina personuppgifter.

För uppgifter om hälsa och andra personliga förhållanden råder stark sekretess. Uppgifter kan dock komma att lämnas ut till myndigheter och till andra forskare. Vill du ha reda på vilka uppgifter som finns registrerade om dig skall du skriftligen begära det hos kontaktpersonen. Ett sådant utdrag har du rätt att få en gång per år utan kostnad. Framkommer det att det står något felaktigt om dig skall den uppgiften rättas. Efter 10 år kommer kodnyckeln att förstöras. Därefter är det inte längre möjligt att lämna ut något registerutdrag.

Väljer du att avbryta ditt deltagande i studien kommer inga fler uppgifter om dig att samlas in men vi har rätt att behålla det som fram till den tidpunkten är insamlat.

Vi ber dig att bekräfta nedan med din namnteckning att du samtycker till behandling av personuppgifter enligt ovanstående beskrivning.

Ort och datum:

Namnteckning:

Namnförtydligande:

1  
2  
3 ANSÖKAN OM ETIKPRÖVNING  
4  
5  
6

# ANSÖKAN OM ETIKPRÖVNING

7  
8  
9  
10 se anvisning sid. 16  
11  
12  
13

---

## Uppgifter som fylls i av den regionala etikprövningsnämnden

14  
15  
16  
17  
18 Ankomstdatum:

Dnr:

19  
20  
21 Avgift inbetald datum:

Begäran om komplettering  
av ansökan:

22  
23  
24 Ansökan komplett:

Begäran om ytterligare

25  
26  
27 Begärd information inkommen:

information:

28  
29  
30 Expeditionsdatum:

Beslutsdatum:

## Uppgifter som fylls i av sökanden

31  
32  
33  
34 Till Regionala etikprövningsnämnden i: Stockholm

35  
36  
37  
38 (Den regionala etikprövningsnämnd till vars upptagningsområde forskningshuvudmannen hör,  
39 se [www.forskningsetikprovning.se](http://www.forskningsetikprovning.se))  
40  
41  
42

## Projekt

43  
44  
45  
46 Ange en beskrivande titel på svenska för lekmän, utan sekretesskyddad information.

47  
48 Ange också i förekommande fall projektets identitet, projektets/forskningsplanens (protokollets eller  
49 prövningsplanens) nummer, version, datum osv.  
50

51  
52 En randomiserad kontrollerad multicenterstudie av en klientcentrerad ADL-intervention  
53 för personer med stroke  
54  
55  
56  
57  
58  
59  
60

1  
2 **ANSÖKAN OM ETIKPRÖVNING**  
3  
4

2

5 **Projektnummer/identitet:**                      **Version nummer:**  
6  
7  
8  
9  
10  
11  
1213 **Ansökan avser (gäller även vid begäran om**  
14 **rådgivande yttrande):**  
15  
16  
17  
18  
19  
2021 forskning där endast en forskningshuvudman deltar (5000 kr)   
2223  
24 forskning där fler än en huvudman deltar (16000 kr)   
2526  
27 forskning där mer än en forskningshuvudman deltar, men där samtliga  
28 forskningspersoner eller forskningsobjekt enligt 4 § lagen (2003:460) om  
29 etikprövning av forskning som avser människor, har ett omedelbart  
30 samband endast med en av forskningshuvudmännen (5000 kr)   
31  
3233  
34 endast behandling av personuppgifter (5000 kr)   
3536  
37 forskning som gäller klinisk läkemedelsprövning (16000 kr)   
3839  
40 ändring av tidigare godkänd ansökan (enligt 4 §) (2000 kr)   
41  
42  
43  
44  
4546 **Om nämnden finner att studien/forskningsprojektet inte faller inom lagens för etikprövning tillämpningsområde**  
47 **önskas ett rådgivande yttrande**48  
49 Ja:       Nej:   
50  
51  
52  
53  
54  
55  
56  
57  
58  
59  
60

## ANSÖKAN OM ETIKPRÖVNING

3

**1. Information om forskningshuvudman m.m.****1:1 Sökande forskningshuvudman**

Ansökan om etikprövning av forskning skall göras av forskningshuvudmannen. *Med forskningshuvudman avses en statlig myndighet eller en fysisk eller juridisk person i vars verksamhet forskningen utförs.* Inom staten utförs forskning främst vid lärosätena, men även vid vissa andra myndigheter, som t.ex. Brottsförebyggande rådet och Socialstyrelsen. Kommuner och landsting kan vara forskningshuvudmän, liksom privaträttsliga juridiska personer.

Namn: Karolinska Institutet, Institutionen för neurobiologi, vårdvetenskap och samhälle, Sektionen för arbetsterapi

Adress: Alfred Nobels Allé 23, Karolinska Institutet, 141 83 Huddinge

**1:2 Behörig företrädare**

Behörig företrädare för forskningshuvudmannen (t.ex. prefekt, enhetschef, verksamhetschef).  
Forskningshuvudmännen bestämmer själva, genom interna arbets- och delegationsordningar eller genom fullmakt, vem som är behörig att företräda forskningshuvudmannen. Bifoga kopia av sådan handling.

Namn: Kerstin Tham

Tjänstetitel: prefekt

Adress: Institutionen neurobiologi, vårdvetenskap och samhälle, Karolinska Institutet,  
141 83 Huddinge

## ANSÖKAN OM ETIKPRÖVNING

**1:3 Forskare som är huvudansvarig för genomförandet av projektet (kontaktperson)**

Namn: Lena von Koch, docent

Adress: Sektionen för arbetsterapi, Fack 23 200, Karolinska Institutet, 141 83  
Huddinge

E-postadress: lena.von.koch@ki.se

Telefon: 08-524 83555

Mobiltelefon: 070-5133055

**1:4 Plats**

Plats/er där projektet skall genomföras (ange inrättning/ar, institution/er, klinik/er etc.).

Karolinska Universitetssjukhusets tre stroke-enheter (Neurologiska kliniken, geriatriska kliniken), stroke-enheten på Danderyds sjukhus, strokeenheterna på Akademiska sjukhuset och Gävle sjukhus, hemrehabiliteringsteam i norra och södra Stockholm, Danderyds geriatriska klinik, rehabilitering medicinska kliniken samt geriatriska kliniken vid Akademiska sjukhuset, kliniken för rehabiliteringsmedicin vid Sandvikens sjukhus samt hemrehabiliteringsteam inom primärvården i Gävleborgs län. Dessutom kommer projektet att genomföras vid arbetsterapikliniker vid Karolinska universitetssjukhuset, Akademiska sjukhuset samt vid Sektionen för arbetsterapi, Institutionen NVS, Karolinska Institutet

**1:5 Andra medverkande**

Övriga deltagande forskningshuvudmän samt forskare ansvariga att lokalt genomföra projektet (kontaktpersoner) skall anges i bilaga (namn, adresser).

Ansvariga forskare i projektet anges i Bilaga 1



**ANSÖKAN OM ETIKPRÖVNING**

5

**1:6 Vid läkemedelsprövning**

Ansökan om tillstånd har insänts till Läkemedelsverket.

Ansökan inlämnad (datum):

Tillstånd erhållits **1:7 Vid viss genetisk forskning**

Anmälan till *Datainspektionen* om förhandskontroll av behandling av personuppgifter om genetiska anlag som framkommit efter genetisk undersökning (10 § första stycket 2 personuppgiftsförordningen (1998:1191)).

Inlämnad (datum):

Kommer att inlämnas efter godkänd etikprövning **2. Uppgifter om projektet****2:1 Sammanfattande beskrivning av forskningsprojektet (programmet)**

## ANSÖKAN OM ETIKPRÖVNING

6

Beskrivningen skall kunna förstås av nämndens lekmän. Undvik därför terminologi som kräver specialkunskaper. Ange bakgrund och syfte för studien samt den (de) vetenskapliga frågeställning (ar) som man söker svar på. Ange de viktigaste undersökningsvariablerna. Ange vilka kunskapsvinster projektet kan förväntas ge och betydelsen av dessa. Ange om det är en registerstudie, uppdragsforskning etc. För fackmän avsedd detaljerad information i protokoll eller forskningsplan *skall* bifogas som bilaga. En utförligare beskrivning över genomförandet *avsedd för lekmän* kan vid behov bifogas den för fackmän avsedda obligatoriska forskningsplanen.

Detta projekt är en fortsättningsstudie i ett större forskningsprogram. Projektet är en fullskalig randomiserad kontrollerad studie(RCT) som bygger på en pilotstudie som genomförts inom ramen för det större forskningsprojektet som godkänts av etikprövningsnämnden (Dnr:2005/1462-31/3 och Dnr: 2006/683-32). Projektet studerar olika aspekter av betydelse för rehabiliteringsprocessen efter stroke. Forskningsprogrammets långsiktiga mål är att utveckla en evidensbaserad modell för rehabilitering efter stroke. Ansökan avser en multicenterstudie av en intervention som syftar till att förbättra förmågan att klara av att utföra aktiviteter i det dagliga livet (ADL) efter stroke. Interventionen är klientcentrerad dvs den utgår från individens egna önskemål. Resultateten från en pilotstudie av interventionen var lovande och ligger till grund för den planerade randomiserade kontrollerade multicenterstudie av den klientcentrerade ADL-interventionen. Interventionen jämförs i studien med konventionell ADL-träning. Syftet är dessutom att i nära samarbete mellan forskare och kliniskt verksamma utveckla och utvärdera ADL-interventionen för personer med stroke. Därutöver är syftet att beskriva personerna med stroke och deras närståendes erfarenheter av den klientcentrerade interventionen.

### Bakgrund

Vård och tidig rehabilitering på stroke-enhet har i jämförelse med annan akutvård visat sig leda till ökad överlevnad och en ökad självständighet i aktiviteter i det dagliga livet (ADL) samt ett minskat behov av institutionsboende. I de fall behovet av rehabilitering kvarstår efter den akuta fasen, sker detta på medicinsk eller geriatrisk rehabiliteringsklinik och/eller inom primärvård. Det saknas evidens för hur den mer långsiktiga rehabiliteringen bäst ska organiseras.

## ANSÖKAN OM ETIKPRÖVNING

7

I Socialstyrelsens uppföljning avseende personers livssituation två år efter deras stroke fann man att tillgång till rehabilitering hade minskat de senaste åren och att 37 % inte fick den rehabilitering de hade behov av. Kvinnor uttryckte ett större behov av ytterligare rehabilitering än män. Andelen informell vård var stor vilket även internationella studier visat. Mer än hälften av de närstående hjälpte till vid ADL och deras livssituation kännetecknades av upplevelser av att vara bunden och en inskränkt frihet i vardagens aktiviteter. Kunskapen om närståendes vardagliga görande är dock begränsad. Förmåga att klara sin personliga vård (ADL) relaterar starkt till livstillfredsställelse hos personer med stroke och deras närstående. Rehabilitering som ökar oberoende i ADL kan därför tänkas ge patienter och närstående en mer fungerande vardag och bättre livstillfredsställelse.

Evidens visar att ADL-träning har god effekt men hur träningen är upplagd varierar mellan olika studier och den är endast vagt beskriven vilket medför svårigheter när forskningsresultaten skall omsättas i klinisk verksamhet. Träningens inflytande på närståendes upplevelser av börda, delaktighet i vardagens aktiviteter och livstillfredsställelse är inte studerad. I det nu aktuella projektet skall en ny klientcentrerad ADL-intervention studeras i en fullskallig randomiserad kontrollerad studie (RCT). Interventionen är baserad på aktuell forskning inom området och en genomförd pilotstudie av interventionen. Pilotstudien visade att de som fick den klientcentrerade interventionen visade en kliniskt signifikant förbättring jämfört med kontrollgruppen.

### Design och metoder

Studien är en prospektiv longitudinell multicenterstudie. Personer som för <3 mån, respektive >6 mån fått en strokedagnos, som akut vårdats på stroke-enhet (Stockholm, Uppsala, Gävle) och som är beroende i minst två ADL-aktiviteter tillfrågas om att delta. En RCT design kommer att användas. Då det finns en uppenbar risk för kontamination mellan grupperna om båda typerna av ADL-träning tillhandahålls vid samma enhet, dvs om både den nya interventionen och den konventionella interventionen ges vid samma enhet riskeras att de arbetsterapeuter som ger interventionen samt patienterna som får interventioner diskuterar och tar intryck av varandra. Därför kommer en randomisering att ske av de kliniker och de hemrehabiliteringsteam som utbildas i att ge den nya interventionen. Deltagarna kommer att få den ADL-träning som tillhandahålls av det hemrehabiliteringsteam eller den klinik dit man remitterats för rehabilitering. Data angående ADL-förmåga, delaktighet i vardagens aktiviteter och livstillfredsställelse kommer att samlas in vid inklusion samt 3, 6 och 12 månader efter inklusion med ett flertal standardiserade bedömningsinstrument. Även kvalitativa data kommer att

## ANSÖKAN OM ETIKPRÖVNING

8

insamlas för att följa processen enligt rekommendationer för studier av komplexa interventioner gjorda med RCT-design. Detta avser både deltagarna i interventionsgrupp och kontrollgrupp (patienter och närstående) samt de arbetsterapeuter som intervenerat i IG.

**Betydelse**

Studien bidrar till kunskapsutveckling angående ADL-interventioner, som 1) kan minska ADL-beroende hos personer med stroke och 2) minska närståendes upplevelse av börda. Interventionen kan även skapa förutsättningar för att upplevelse av livstillfredsställelse och delaktighet i vardagens aktiviteter ökar för personer med stroke och deras närstående.

**2:2 Vilken primär vetenskaplig frågeställning ligger till grund för projektets utformning**

Om projektet kan karakteriseras som en hypotesprövning, ange den primära och eventuellt sekundära hypotesen. Hänvisning till mer detaljerad information för fackmän kan ske till bifogat protokoll eller forskningsplan enligt 2:1

En klientcentrerad ADL-intervention har bättre effekt på ADL-förmåga och livstillfredsställelse för personer med stroke än gängse ADL-träning. Närstående till personer med stroke som fått en klient centrerad ADL intervention upplever mindre anhörigbörda och har högre livstillfredsställelse än närstående till dem som fått gängse ADL-träning.

**2:3 Redogör för resultat från relevanta djurförsök**

För viss, främst medicinsk, forskning ange skälen till att djurförsök inte utförts.

Ej aktuellt

**2:4 Redogör översiktligt för undersökningsprocedur, datainsamling och datas karaktär**

## ANSÖKAN OM ETIKPRÖVNING

9

Av beskrivningen skall framgå hur studien planeras genomföras. Beskriv insamlade datas karaktär. Hur säkerställs datas tillförlitlighet (t.ex. kvalitetskontroll/monitorering)? - Vid enkäter och intervjuer skall beskrivas tillvägagångssätt och t.ex. frågors innehåll och hur slutsatser dras. Enkäter och skattningsskalor skall bifogas. - För medicinsk forskning skall anges t.ex. typer av ingrepp, mätmetoder, antal besök, tidsåtgång vid varje försök, doser och administrationssätt för eventuella läkemedel och/eller isotoper, blodprovsmängd (även ackumulerad mängd vid multipla försök). Ange även om och på vilket sätt undersökningsprocedur m.m. skiljer sig från klinisk rutin. Ange proceduren för att ge den eventuella behandling efter studiens slut, som kan erfordras. Ange procedur för insamling av biologiskt material. Redogör för datakällor och procedurer vid behandling av personuppgifter. För mer detaljerad information kan hänvisning ske till bilagt protokoll eller forskningsplan enligt 2:1.

Personer som fick stroke för <3 månader sen (grupp A) eller som fick stroke för >6 månader sen (grupp B) och som vårdades akut på strokeenhet i Stockholm, Uppsala eller Gävle och är beroende i personlig eller instrumentell ADL och som remitterats för rehabilitering tillfrågas om att delta. Om det är aktuellt tillfrågas även närstående om deltagande. Efter informerat samtycke kommer baslinjemätningar att genomföras. Deltagarna kommer att få den typ av ADL-träning (IG eller KG) som tillhandahålls av det hemrehabiliteringsteam eller den klinik dit man remitterats för rehabilitering. Randomiseringen stratifieras för tid sen insjuknandet (grupp A/grupp B) och för grupp A var interventionen kommer att äga rum. För både IG och KG kommer ADL-träningen att genomföras inom slutenvård, öppenvårdsmottagningar eller i personernas eget hem. För att beskriva deltagarnas (patienternas) diagnos och medicinska behandling, ålder, kön och sociodemografiska data hämtas information från medicinsk journal. Data samlas in vid inklusion och vid 3, 6 respektive 12 månader efter inklusion av tränade arbetsterapeuter som är blindade för om personen tillhör IG eller KG. Inte heller patienten har kännedom om vilken grupp de tillhör.

Bedömningsinstrument (se bilagor 5)

Inför inklusion bedöms deltagarna (patienterna) med Mini Mental State Examination (Folstein et al, 1975); Katz Extended ADL-index (Hulter-Åsberg & Sonn, 1989).

Efter inklusion och vid uppföljningar vid 3, 6 och 12 månader bedöms deltagarna med bedömningsinstrument som mäter motorisk funktion, ADL-förmåga, delaktighet i

## ANSÖKAN OM ETIKPRÖVNING

10

aktiviteter och autonomi, trötthet, egen uppfattning om påverkan av stroke, livstillfredsställelse och närståendebörda enligt nedan.

**Patienter:**

Nine-hole peg test (Mathiowetz et al, 1985) ; 10 m gångtest (Wade et al, 1987); Barthel Index (Mahoney et al, 1965); Assessment of Motor and Process Skills; (Fisher, 2006); Frenchay Activity Index (Wade et al, 1985); Occupational Gaps Questionnaire (Eriksson et al, 2006); Impact on Participation and Autonomi Questionnaire (Larsson Lund et al, 2007); Fatigue Severity Scale (Krupp et al, 1989) Stroke Impact Scale (Duncan et al, 1999) (Närståendeversion av SIS kommer att användas då personen är oförmögen att svara pga kognitiva eller språkliga begränsningar); LiSat-11 (Fugl-Meyer et al, 2002).

Språk-fråga från Scandinavian Stroke Scale (Lindenström et al, 1991)

**Närstående:**

Caregiver's Burden Scale (Elmståhl et al, 1996); LiSat-11 (Fugl-Meyer et al, 2002); Occupational Gaps Questionnaire (Eriksson et al, 2006).

Under interventionen (IG) används Canadian Occupational Performance Measure (COPM) (Law et al, 1998) som underlag för vilka aktiviteter träningen ska ha fokus på.

Vid alla 4 datainsamlingstillfällena samlas data in om patienternas tillfredsställelse med vården och de närståendes tillfredsställelse med vården (se bilaga 5)

Deltagarna i IG kommer att delta i klientcentrerad ADL-intervention (≤10 tillfällen x 60-90 minuter under 2-3 månader) ledd av arbetsterapeuter som deltagit i en 5 dagar workshop designad för projektet. Uppföljning av och bekräftande av den kunskap som inhämtats vid workshopen planeras att ske i samband med ett interventionstillfälle. Patienten tillfrågas innan om samtycke om att forskare deltar vid interventionstillfället. Deltagarna i KG kommer att få ≤10 behandlings/tränings/interventionstillfällen x 60 minuter under 2-3 månader av arbetsterapeuter som inte har deltagit i utbildning i den klientcentrerade ADL-interventionen. Interventionen kan variera i innehåll och metod i förhållande till de rutiner och praxis som deltagande klinik eller hemrehabiliteringsteam använder sig av.

**2:5 Redogör för om insamlat biologiskt material kommer att förvaras i en biobank**

## ANSÖKAN OM ETIKPRÖVNING

11

*Med biobank avses biologiskt material från en eller flera människor som samlas och bevaras tills vidare eller för en bestämd tid och vars ursprung kan härledas till den eller de människor från vilka materialet härrör.*

Redogör för var och hur prover som skall sparas förvaras, kodningsprocedurer och villkor för utlämnande av prover. Observera att i förekommande fall skall anmälan av biobank ske till Socialstyrelsen enligt lagen (2002:297) om biobanker i hälso- och sjukvården m.m.

Ej aktuellt

**2:6 Redovisa tillgång till nödvändiga resurser under hela projektets genomförande**

Ange vilka som har ansvaret (prefekt, verksamhetschef eller motsvarande) för forskningspersonernas säkerhet vid alla enheter/kliniker där patienter ingår samt att erforderliga ekonomiska och personella resurser finns tillgängliga. Intyg från dessa skall bifogas.

Data kommer att insamlas på klinik eller i patient/närståendes hemmiljö. Data avseende interventionen (både IG och KG) insamlas av patientens ordinarie arbetsterapeut.

Arbetsterapeuter som ger den nya klientcentrerade interventionen erbjuds utbildning i workshop designad och genomförd av ansvariga forskare.

Ansvariga för deltagarnas säkerhet och ekonomiska/personella resurser är:

Prefekt (Kerstin Tham)

Huvudsökande och medsökande forskare samt följande verksamhetschefer:

Stockholm: Neurologiska kliniken (Lars-Olof Ronnevi), Geriatriska kliniken (Sinnika Svensson), Arbetsterapikliniken (Monika Samuelsson) vid Karolinska

Universitetssjukhuset ; Danderyds sjukhus, Geriatriska kliniken (Eva Boetius) och

medicinkliniken (Weine Lannsjö); Uppsala: Akutsjukvård, strokeenheten (Urban

Säwfenberg), Rehabiliteringskliniken (Carl Molander) Geriatriska kliniken (Meta

Falkeborn), Arbetsterapikliniken (Birgitta Wallgren)

Gävleborg: Division primärvård, VO Rehabilitering (Margreth Rosenberg); Division

Medicin, VO Medicin 2, Rehabiliteringsmedicin (Elisabeth Sundström)

(Se intyg i bilaga 9)

**2:7 Journalföring, registrering och hantering av data**

Redogör för hur undersökningsprocedurer och eventuella ingrepp journalförs. Ange hur registrering och behandling av resultaten skall gå till. Om materialet skall kodas, ange proceduren, vem som förvarar kodlistor och vem eller vilka som har tillgång till dem, var de förvaras, hur länge samt om materialet kommer att anonymiseras eller förstöras. Används band- och videoinspelningar? Vilken tillgänglighet har datamaterialet? Hur förvaras det? Hur erhålls erforderligt sekretesskydd?

Data läggs in i en databas som kommer att anmälas till personuppgiftsombudet vid Karolinska Institutet så snart vi erhållit godkännande från etikprövningnämnen. Materialet kommer att kodas för att skydda deltagarnas konfidentialitet. Huvudansvarig forskare ansvarar för kodning när deltagaren lämnat informerat samtycke. En kodnyckel förvaras i låst skåp på institutionen. Projektansvarig forskare, kontaktpersoner och forskningsassistenter har tillgång till kodnyckeln. Så snart projektet är rapporterat förstörs kodnyckeln. Datamaterialet förvaras i låst rum på institutionen. Huvudansvarig och medansvariga forskare i projektet har tillgång till datamaterialet. Datamaterialet är helt avkodat och hanteras konfidentiellt. Ansvariga arbetsterapeuter som genomför ADL-intervention för journal enligt gängse praxis vid kliniken angående interventionen och dess effekt. Övrig data journalförs enbart om bedömningsinstrumentet ingår i klinikens ordinarie undersökningsrutiner.

## **2:8 Redogör för tidigare erfarenheter (egna och/eller andras) av den använda proceduren, tekniken eller behandlingen**

Särskilt angeläget är att redovisning av risker för komplikationer görs tydliga och i förekommande fall med angivande av relevanta publikationer. Om ansökan avser fortsättning eller uppföljning av tidigare projekt, ange diarienummer samt datum för beslut av tidigare godkänd ansökan. Vid nya läkemedelsbehandlingar av patienter bör anges hur många patienter (med aktuell eller annan åkomma) som tidigare erhållit föreslagen eller högre dosering samt hur långa behandlingsperioder som studerats.

De metoder för undersökning och intervention som kommer att användas i projektet är vanliga inom ordinarie vård och rehabilitering efter stroke. Alla metoder är tidigare använda i forskning inom forskargruppen. I den stora studie som detta projekt baseras



på har flertalet av dessa metoder använts och denna studie har godkänts av Regionala etikprövningsnämnden (Dnr:2005/1462-31/3) samt i en kompletteringsansökningen (Dnr: 2006/683-32).

### 3. Uppgifter om forskningspersoner

#### 3:1 Hur görs urvalet av forskningspersoner

*Med forskningsperson avses en levande människa som forskningen avser.*

Ange urvalskriterier (inklusion och exklusion). På vilket sätt kommer forskaren i kontakt med/får kännedom om lämpliga forskningspersoner? Ange om rekrytering sker från (egna, andras) tidigare eller pågående studier. Om annonsering sker, skall annonsmaterialet insändas som bilaga. Om t.ex. barn, eller personer som tillfälligt eller permanent inte är kapabla att ge ett eget informerat samtycke skall tillfrågas om deltagande i projektet, skall detta särskilt motiveras. Om vissa grupper (t.ex. kvinnor, barn eller äldre) utesluts från deltagande i projektet skall detta särskilt motiveras.

De personer som vårdats på strokeenheter i Stockholm, Uppsala och Gävle och som fick sin stroke för < 3 månader sen (grupp A) och personer som vårdats akut på samma strokeenheter och som hade sin stroke för > 6 månader sen (grupp B) och som remitterats till rehabilitering på deltagande rehabiliteringskliniker ( Danderyds sjukhus geriatriska klinik, Akademiska sjukhuset, Rehabiliteringskliniken på Sandvikens sjukhus eller i deltagande hemrehabiliteringsteam (i Stockholm, Uppsala och Gävleborgs län) tillfrågas om deltagande. Deltagarna kommer att konsekutivt tillfrågas om deltagande i studien och i det fall det är aktuellt tillfrågas en närstående om deltagande.

Inklusionskriterier Grupp A: a) Beroende i minst två ADL aktiviteter (P-eller I-ADL) enligt Katz Extended ADL-index (12) och som bedöms behöva träning i ADL, b) som är remitterade till rehabilitering till 1) ett av deltagande hem rehabiliterings team eller

dagvårdsrehabiliteringsenhet 2) Danderyds sjukhus geriatriska klinik, Akademiska sjukhuset, Sandvikens sjukhus c) >23 poäng på Mini-Mental State examination (MMSE) (13), d) kan förstå frågor och instruktioner. Inklusionskriterier Grupp B:a) Beroende i minst två ADL aktiviteter (P- eller I-ADL) enligt Katz Extended ADL-index (12) och som bedöms behöva träning i ADL, b) >23 poäng på Mini-Mental State examination (MMSE) 13, c) kan förstå frågor och instruktioner. Efter samtycke deltar patienterna i den ADL-träning som tillhandahålls av det hemrehabiliteringsteam eller den klinik dit man remitterats för rehabilitering (IG eller KG). Huvudansvarig forskare ansvarar för randomisering av vilka kliniker och hemrehabiliteringsteam som ska få utbildning i den nya ADL-interventionen (IG) och för information till ansvariga arbetsterapeuter vid varje rehabiliteringsenhet.

### 3:2 Ange relationen mellan forskare/försöksledare och forskningspersonerna

Behandlare (t.ex. läkare, psykolog, sjukgymnast) - forskningsperson (t.ex. patient, klient)

Kursgivare (lärare) - student

Arbetsgivare - anställd

Annan relation. Beskriv: forskare och deltagare

### 3:3 Redogör för det statistiska underlaget för studiepopulationens (ernas)/ undersökningsmaterialets(-ens) storlek

Redovisa en statistisk styrka, så kallad "power"-beräkning eller motsvarande överväganden för tydliggörande av studiens möjligheter att besvara frågeställningarna.

En power-analys är genomförd. En skillnad som utgör en kliniskt signifikant förbättring och som är anpassat till ett 15%-igt bortfall (alpha satt till 0.05 och beta på 0.80) kräver ett deltagande av 230 personer (115 personer i varje grupp; IG+KG).

## ANSÖKAN OM ETIKPRÖVNING

15

**3:4 Kan forskningspersonerna komma att inkluderas i flera studier samtidigt eller i nära anslutning till denna studie**

Ange om forskningspersonerna kan inkluderas samtidigt i flera studier eller i nära anslutning till denna studie. Ange i så fall projektitel, forskningshuvudman, forskare som genomför studien (kontaktperson) samt diarienummer (om känt) för de övriga studierna. När avslutades ett eventuellt tidigare deltagande?

Ej aktuellt

**3:5 Vilket försäkringsskydd finns för de forskningspersoner som deltar i projektet**

Det åligger forskningshuvudmannen att kontrollera att befintliga försäkringar täcker eventuella skador som kan uppkomma.

Ej aktuellt

**3:6 Vilken ekonomisk ersättning eller andra förmåner utgår till de forskningspersoner som deltar i projektet och när betalas ersättningen ut (Utförligare beskrivning kan lämnas i bilaga)**

Ersättning för obehag och besvär. Belopp (före skatt):

Ersättning för förlorad arbetsinkomst  Ja  NejResersättning  Ja  NejBefrielse från kostnader för läkemedel  Ja  Nej

Befrielse från andra kostnader. Vilka?

Andra förmåner. Vilka?

När betalas ersättningen ut?

Ingen ersättning betalas ut

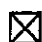

## 4. Information och samtycke

### 4:1 Proceduren för och innehållet i den information som lämnas då forskningspersoner tillfrågas om deltagande

Beskriv hur och när information ges och vad den innehåller. Vem informerar? Normalt skall en kortfattad och lättförståelig skriftlig information ges. Denna skriftliga information skall bifogas ansökan. Om ingen eller ofullständig information ges, måste skälen för detta noggrant anges.

***Forskningspersonen skall informeras om***

- den övergripande planen för forskningen
- syftet med forskningen
- de metoder som kommer att användas
- de följder och risker som forskningen kan medföra
- vem som är forskningshuvudman och kontaktperson
- att deltagandet i forskningen är frivilligt och
- forskningspersonens rätt att när som helst avbryta sin medverkan.

Deltagarna tillfrågas muntligt om att delta i studien när de bedömts behöva träning i ADL för grupp A < 3 månader har gått sen de fick sin stroke eller avseende grupp B > 6 månader sen stroke. Deltagaren(patienten) tillfrågas om de har någon närstående som vi får tillfråga om deltagande. Därefter tillfrågas den närstående om deltagande.

Deltagarna får även en skriftlig information (se bilaga 4:1) av ansvarig forskningassistent i projektet (grupp A) (grupp B). Forskningsassistenten tillfrågar patient och närstående om samtycke. Muntlig och skriftlig information till deltagare i studien innehåller syfte med forskningen, sammanfattning av projektplan och metoder för intervention och datainsamling, konfidentialitet, frivillighet, rätt att när som helst avbryta deltagande samt information om huvudman och kontaktperson för projektet. Se bilaga 4.

Deltagare(patient och närstående) i både IG och KG kommer att tillfrågas om deltagande i en intervju efter avslutad intervention i syfte att fånga deras erfarenheter av ADL- interventionen. Ansvarig arbetsterapeut på rehabiliteringsenheten

**ANSÖKAN OM ETIKPRÖVNING**

17

/forskningsassistent informerar och tillfrågar deltagarna om samtycke. Skriftlig information om studien lämnas. Se bilaga 4.

**4:2 Hur och från vem inhämtas samtycke**

Beskriv proceduren; vem som frågar, när detta sker och hur samtycket dokumenteras. Utförlig redovisning är särskilt viktig då barn eller personer med nedsatt beslutskompetens ingår i studien, likaså vid studier av en grupp (grupper), t.ex. föreningar, organisationer, företag, kyrkosamfund och församlingar eller arbetet i en skolklass.

Ansvarig forskningsassistent vid respektive ort (Stockholm, Uppsala, Gävle) (grupp A) (grupp B) informerar och tillfrågar patienten och närstående person. Alla som tillfrågas får en kod (avidentifieras) som förs in i en kodnyckel/lista av forskare/forskningsassistent. I denna lista förs detaljerad information om vem som tillfrågats och vem som tackat ja/nej till att delta och, om personen angivit detta, anledningen till att han/hon avböjt att delta.

**5. Forskningsetiska överväganden****5:1 Redogör för risker som deltagandet kan medföra samt möjliga komplikationer**

## ANSÖKAN OM ETIKPRÖVNING

18

Detta kan vara t.ex. smärta, obehag eller integritetsintrång som projektet innebär eller kan innebära. Har åtgärder vidtagits för att förebygga de risker som sägs ovan? Vilken beredskap finns att hantera dessa komplikationer? Ange metoder som kommer att användas för att efterforska, registrera och rapportera oönskade händelser.

Patienter och närstående som tillfrågas om deltagande tidigt efter insjuknandet i stroke (grupp A) kan uppleva det som integritetskränkande att bli tillfrågade så tidigt att man kanske ännu inte har förstått vad det innebär och vilka konsekvenserna är efter en stroke. Ansvarig forskningsassistent vid respektive ort (Stockholm, Uppsala, Gävle) kommer att ansvara för information och samtycke. Forskningsassistenterna har lång erfarenhet av patienter med stroke och deras närstående och är vana att resonera om konsekvenser av stroke och möjlighet till rehabilitering och stöd. Riskerna för integritetsintrång minimeras genom detta. Vissa frågor som ingår i frågeformulär, som frågor om tankeförmåga och humörförändringar i Stroke Impact Scale, kan upplevas som integritetskränkande och känsliga. Dock är involverade forskare erfarna i att hantera denna typ av situation och ge stöd om deltagaren så önskar eller erbjuda sig att ta kontakt med läkare, kurator eller annan vårdgivare som bedöms vara relevant i situationen.

Ett annat etiskt dilemma som kan uppstå är att patienter som tillhör kontrollgruppen och får konventionell ADL-träning, upplever att de får en sämre intervention än deltagarna i interventionsgruppen. Vi vet dock att konventionell ADL-träning är en väl beprövad metod, och risken för missnöje är liten då patienter brukar vara nöjda med sin konventionella ADL-träning.

### **5:2 Redogör för förutsebar nytta för de forskningspersoner som ingår i projektet**

Alla deltagare får möjlighet att berätta om sin situation i vardagens aktiviteter vid fyra tillfällen under det första året efter stroke. Patienterna får träna sig i att utföra dagliga aktiviteter de har problem med att utföra och för interventionsgruppen utformas träningen utifrån deras eget perspektiv på vilka aktiviteter som de helst vill kunna återuppta. Patienterna får också en möjlighet att följa sin egen förbättringsprocess genom uppföljande funktions- och aktivitetsförmågebedömningar. Närstående, som ofta

upplever en belastning i vardagen, får en möjlighet att delge forskaren sina upplevelser i vardagssituationen och ev förändringar i delaktigheten i vardagens aktiviteter. Det upplevs ofta som positivt att få berätta om sin egen situation för någon som är erfaren inom området.

### **5:3 Gör en egen värdering av förhållandet risk – nytta för de forskningspersoner som deltar**

För de allra flesta deltagare, både patienter och närstående, kommer projektet att innebära en fördel genom att de ges möjlighet att resonera om konsekvenserna av stroke i vardagens aktiviteter. Vanligtvis ges inte denna möjlighet i denna omfattning (4 tillfällen på ett år). Tidigare forskning visar att flertalet patienter och närstående har ett behov av uppföljning och samtal kring dessa frågor som är av central betydelse i deras vardagsliv. Patienterna får genom träningsinsatser en möjlighet att återuppta sina aktiviteter igen.

### **5:4 Identifiera och precisera vilka etiska problem t.ex. risk – nytta i ett vidare perspektiv som kan uppstå inom eller genom projektet**

Datainsamlingen kan i sig anses fylla ett behov hos patienter och närstående och därigenom anses vara terapeutiska, vilket innebär att vi inom projektet bör vara medvetna om att projektet kan inverka på den process vi avser att studera.

## **6. Redovisning av resultaten**

### **6:1 Hur garanteras forskningshuvudmannen och medverkande forskare tillgång till data (anges vid t.ex. uppdragsforskning) och vem ansvarar för databearbetning och rapportskrivning**

|                                                                                                                                                                             |
|-----------------------------------------------------------------------------------------------------------------------------------------------------------------------------|
| Vid uppdragsforskning anges hur forskningshuvudmannen och medverkande forskare garanteras tillgång till data och vem som ansvarar för databearbetning och rapportskrivning. |
|-----------------------------------------------------------------------------------------------------------------------------------------------------------------------------|

**ANSÖKAN OM ETIKPRÖVNING**

20

Huvudansvarig forskare och medansvariga forskare ansvarar för data, databearbetning och rapportskrivning.

**6:2 Hur kommer resultaten att göras offentligt tillgängliga**

Kommer studien att insändas för publicering i tidskrift eller publiceras på annat sätt

Ange i vilken form resultaten planeras offentliggöras samt tidsplan för detta.

Resultat från projektet kommer att publiceras i form av vetenskapliga artiklar (ca 5).

**6.3 På vilket sätt garanteras forskningspersonernas rätt till integritet när materialet offentliggörs/publiceras**

Beskriv procedurer eller metod för avidentifiering/anonymisering. Redovisas endast resultat på statistisk gruppnivå?

All data kommer att behandlas konfidentiellt och det kommer inte att på något sätt att vara möjligt att identifiera en enskild deltagares identitet i rapporteringen som huvudsakligen kommer att redovisa resultat på statistisk gruppnivå.

**7. Redovisning av ekonomiska förhållanden och beroendeförhållanden****7:1 Vid uppdragsforskning**

Ange uppdragsgivaren t.ex. vid klinisk läkemedelsprövning.

Namn:

Kontaktperson:

Adress:

Telefon/mobiltelefon:

Ange uppdragsgivarens relation till forskningshuvudmannen/medverkande forskare, t.ex. anställningsförhållande.



## ANSÖKAN OM ETIKPRÖVNING

21

Ej aktuellt

**7:2 Redovisa eventuella ekonomiska överenskommelser med uppdragsgivare eller andra finansiärer (namn, belopp)**

Vid klinisk läkemedelsprövning kan hänvisning ske till ingånget avtal med sjukvårdshuvudmannen eller genom uppgift om föreslagen ersättning enligt överenskommelsen mellan Landstingsförbundet och LIF som bifogas. Separata överenskommelser med den/de som skall genomföra forskningen skall också redovisas. Om överenskommelserna inte är klara i sin helhet vid tidpunkten för ansökan skall belopp för studien/ersättning till kliniken/genomföraren och vad ersättningen skall täcka alternativt belopp per forskningsperson anges här. Vid studier där fler än en forskningshuvudman deltar skall principerna för och storleksordningen för ersättning för studien i sin helhet anges.

Ej aktuellt

**7:3 Redovisa forskningshuvudmannens och medverkande forskares intressen/tillgångar**

Redovisa de som kan tänkas påverka tilltron till objektiviteten i genomförande och rapportering (t.ex. aktieinnehav eller konsultuppdrag i finansierande företag).

Ej aktuellt

**8. Förteckning över bilagor**

Dokument som, i tillämpliga fall, skall bifogas om inte motsvarande information finns i blanketten har markerats med x. Markera de bilagor som skickas in med denna ansökan.

| Insänd med ansökan                  | Bil nr     | Beskrivning                                                                                                                    | Klinisk läkemedels prövning | Annan forskning |
|-------------------------------------|------------|--------------------------------------------------------------------------------------------------------------------------------|-----------------------------|-----------------|
| <input type="checkbox"/>            | 1<br>p 1:5 | Deltagande forskningshuvudmän och medverkande forskare (kontaktpersoner) vid forskning där mer än en forskningshuvudman deltar | x                           | x               |
| <input checked="" type="checkbox"/> | 2          | För fackmän avsedd projekt/forskningsplan (protokoll),                                                                         | x                           | x               |

## ANSÖKAN OM ETIKPRÖVNING

22

|                                     |                      |                                                                                                                                                                                       |   |   |
|-------------------------------------|----------------------|---------------------------------------------------------------------------------------------------------------------------------------------------------------------------------------|---|---|
|                                     | p 2:1                | vid behov även för lekmän avsedd bilaga                                                                                                                                               |   |   |
| <input type="checkbox"/>            | 3<br>p 3:1           | Annonsmaterial för rekrytering av forskningspersoner                                                                                                                                  | x | x |
| <input checked="" type="checkbox"/> | 4<br>p 4:1           | Skriftlig information till dem som tillfrågas                                                                                                                                         | x | x |
| <input checked="" type="checkbox"/> | 5<br>p 2:4           | Enkät, frågeformulär                                                                                                                                                                  | x | x |
| <input type="checkbox"/>            | 6                    | Gemensam EU-blankett (gäller fr.o.m. den 1 maj 2004),<br>gäller även vid ändring                                                                                                      | x |   |
| <input type="checkbox"/>            | 7                    | Sammanfattning av protokollet på svenska                                                                                                                                              | x |   |
| <input type="checkbox"/>            | 8                    | Prövarhandbok alt. bipacksedel/produktresumé                                                                                                                                          | x |   |
| <input checked="" type="checkbox"/> | 9<br>p 2:6           | Intyg från verksamhetschef/motsv. om resurser                                                                                                                                         | x | x |
| <input checked="" type="checkbox"/> | 10                   | CV för forskare (samma som p 1:3) med huvudansvar<br>för genomförande (redovisa forskarens kompetens)                                                                                 | x | x |
| <input type="checkbox"/>            | 11<br>p 3:6          | Beskrivning av ersättning till forskningspersoner                                                                                                                                     | x | x |
| <input type="checkbox"/>            | 12<br>p 7:1<br>p 7:2 | Överenskommelser med uppdragsgivare/finansiär om<br>t.ex. anställningsförhållanden, bidrag/ersättning till<br>prövningsplats, sjukvårdshuvudman,<br>forskningshuvudman eller forskare | x | x |
| <input type="checkbox"/>            | 13                   | Tillstånd från strålskyddskommitté eller motsvarande                                                                                                                                  | x | x |

## 9. Undertecknande

Behörig företrädare för sökande forskningshuvudman enligt p 1:2.

Ort: *Huddinge* Datum: *09/04/17**Kerstin Tham*

Signatur

Namnförtydligande: *Kerstin Tham*

## ANSÖKAN OM ETIKPRÖVNING

23

Undertecknad forskare som genomför projektet (kontaktperson) enligt p 1:3 intygar härmed att forskningen kommer att genomföras i enlighet med ansökan.

Ort: *Steln*

Datum:

*090416**Lena von Koch*

Signatur

Namnförtydligande:

*Lena von Koch*

## Anvisning för ansökan

Denna ansökningsblankett används vid ansökan om etikprövning enligt lagen (2003:460) om etikprövning av forskning som avser människor. Den är avsedd att användas för all slags forskning där godkännande skall inhämtas från en etikprövningsnämnd. Blanketten skall användas även vid begäran om rådgivande yttrande enligt 2 § förordning (2003:616) med instruktion för regionala etikprövningsnämnder. Beroende på vilken forskning som ansökan gäller kommer de uppgifter som efterfrågas redan att ha olika relevans. Därmed varierar också kravet på utförlighet i redovisningen av dessa. Markera på formuläret när uppgiften inte berör det aktuella projektet. Ansökan skall ifyllas så att den blir lättläst, dvs. den skall inte vara handskriven och inte skriven med liten stil och kort radavstånd. Blanketten skall skrivas på svenska.

1 **Bilaga 1.**  
2

3  
4 *Behörig företrädare för forskningshuvudmannen:*  
5

6 **Kerstin Tham**  
7

8  
9  
10 *Forskare som är huvudansvarig för genomförande av projektet:*  
11

12 **Lena von Koch**  
13  
14  
15

16  
17 *Andra medverkande forskare ansvariga att lokalt genomföra projektet:*  
18

19 **Gunilla Eriksson, Med Dr, Leg. arbetsterapeut**  
20 Karolinska Institutet, Sektionen för arbetsterapi,  
21 Institutionen för neurobiologi, vårdvetenskap och samhälle, Alfred Nobels Allé 23  
22 141 86 Stockholm  
23 VO Arbetsterapi, Akademiska sjukhuset, 751 85 Uppsala  
24 Enheten för rehabiliteringsmedicin, Inst. för neurovetenskap, Uppsala universitet  
25

26  
27 **Ulla Johansson, Med Dr, Leg. arbetsterapeut**  
28 Karolinska Institutet, Sektionen för arbetsterapi,  
29 Institutionen för neurobiologi, vårdvetenskap och samhälle, Alfred Nobels Allé 23  
30 141 86 Stockholm  
31 Kliniken för rehabiliteringsmedicin, VO Medicin 2, Sandvikens sjukhus, 811 89 Sandviken  
32 Enheten för rehabiliteringsmedicin, Inst. för neurovetenskap, Uppsala universitet  
33  
34

35 **Susanne Guidetti, Med Dr, Leg. arbetsterapeut**  
36 Karolinska Institutet, Sektionen för arbetsterapi,  
37 Institutionen för neurobiologi, vårdvetenskap och samhälle, Alfred Nobels Allé 23, Alfred  
38 Nobels Allé 23, 141 86 Stockholm  
39 Arbetsterapikliniken, Karolinska Universitetssjukhuset, Solna, 171 76 Stockholm  
40  
41

42 **Charlotte Ytterberg, Med Dr, Leg. sjukgymnast**  
43 Karolinska Institutet, Sektionen för neurologi, R54,  
44 Karolinska Universitetssjukhuset, Huddinge,  
45 141 86 Stockholm  
46 Karolinska Institutet, Sektionen för sjukgymnastik, Institutionen för neurobiologi,  
47 vårdvetenskap och samhälle, Alfred Nobels Allé 23, 141 86 Stockholm  
48  
49  
50  
51  
52  
53  
54  
55  
56  
57  
58  
59  
60

## Fortsättningsansökan om ALF projektmedel 2009, medicin

Nedanstående uppgifter ifylles av den sökande i överensstämmelse med de uppgifter som lämnats på registreringsformuläret på SLL:s hemsida för forskningsanslag ([www.forskningsstod.sll.se](http://www.forskningsstod.sll.se))

### Ansökningsnummer

|               |          |
|---------------|----------|
| Ansökn.nummer | 20080156 |
|---------------|----------|

### Tidigare ansökningsnummer

|               |          |
|---------------|----------|
| Ansökn.nummer | 20060700 |
|---------------|----------|

### Huvudsökande

|                    |                                  |
|--------------------|----------------------------------|
| Personnummer       | 560808-5600                      |
| Namn               | Kerstin Tham                     |
| Sjukhus/motsv.     | Karolinska Universitetssjukhuset |
| Klinik/motsvarande | Arbetsterapi                     |

### Projekttitel (maximalt 210 tecken)

|                                                                                                    |
|----------------------------------------------------------------------------------------------------|
| En randomiserad kontrollerad studie av en klientcentrerad ADL-intervention för personer med stroke |
|----------------------------------------------------------------------------------------------------|

## Populärvetenskaplig sammanfattning

Läs anvisningarna! Följ dem noga. **Maximal omfattning 1500 tecken (motsv. en halv A4-sida).** Skall skrivas på svenska! Använd nedanstående rubriker. Text kan kopieras från andra dokument. Formatera till Arial 11 punkter, radavstånd 1,5. **Börja skriv på raden under rubriken.**

### 1. Frågeställning/Hypotes

Personer med stroke som får en klientcentrerad ADL-intervention (KADL) blir mindre beroende i aktiviteter i dagligt liv (ADL) än de som får ordinär ADL-träning (OADL) och närstående upplever lägre "caregiver burden"

### 2. Målsättning

I nära samarbete forskare-kliniker utveckla, utvärdera och implementera en KADL-intervention för personer med stroke; beskriva patienters och närståendes upplevelser och terapeuternas implementeringsprocess.

### 3. Bakgrund

Beroende i ADL är vanligt efter stroke och närstående upplever "caregiver burden". Rehabilitering som ökar oberoende i ADL kan ge patienter och närstående en mer fungerande vardag och ökad livstillfredsställelse. Evidens visar att ADL-träning har god effekt men studerade interventioner varierar och beskrivs sparsamt vilket försvårar implementering; träningens inflytande på närståendes upplevelse av "caregiver burden" och livstillfredsställelse är ej studerad.

### 4. Preliminära resultat

Denna studie utgår från ett pågående strokeprojekt som identifierar patienters och närståendes behov av rehabilitering och stöd; 376 patienter ingår; 40 av dessa ingick i en pilotstudie av en KADL-intervention. Resultatet var lovande och ligger till grund för denna randomiserade kontrollerade studie av KADL-intervention i jämförelse med OADL (n=136).

### 5. Design och metoder

Design och metoder från pilotstudien kommer att användas i denna RCT av effekten av KADL-intervention i jämförelse med OADL (n=136).

### 6. Patientnytta

Studien bidrar till utveckling och implementering av en ADL-intervention för personer med stroke som kan minska beroende i ADL och närståendes upplevelse av "caregiver burden".

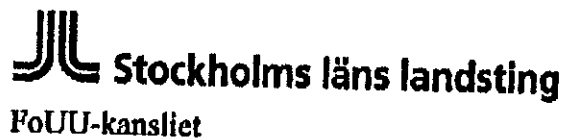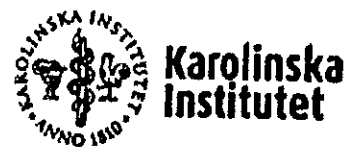

1  
2  
3  
4  
5  
6  
7  
8  
9  
10  
11  
12  
13  
14  
15  
16  
17  
18  
19  
20  
21  
22  
23  
24  
25  
26  
27  
28  
29  
30  
31  
32  
33  
34  
35  
36  
37  
38  
39  
40  
41  
42  
43  
44  
45  
46  
47  
48  
49  
50  
51  
52  
53  
54  
55  
56  
57  
58  
59  
60

## Progressrapport

*Läs anvisningarna! Följ dem noga. Maximalt utrymme 1 A4-sida. Text kan kopieras från andra dokument. Obs! Formatera till Arial 11 punkter och radavstånd 1,5.*

**Pågående projekt:** Projektet har fått ekonomiskt stöd av ALF under 2006-2008. Patienter (n=376) och deras närstående har inkluderats i studien från 15 maj 2006 till 14 maj 2007. Datainsamling är genomförd vid 3 och 6 månader efter stroke och uppföljningen vid 12 månader avslutas i juni 2008. Därefter påbörjas bearbetning och analys av insamlad data utifrån studiens syften och frågeställningar. Cirka 15 arbetsterapeuter (AT) och sjukgymnaster (SG) vid Karolinska Universitetssjukhuset har varit och är involverade i datainsamlingen. Inom projektet genomförs f.n. tre magisterarbeten på 30 hp var.

**Doktorander i projektet:** En doktorand, Susanne Guidetti (disputationsdatum 080530), arbetar i projektet och avslutar nu ett delarbete, en randomiserad kontrollerad pilotstudie, som i mars 2008 skickas in för publicering i slutet av mars 2008. Ytterligare två doktorandtjänster, en finansierad av Nationella forskarskolan i vård och omsorg, en finansierad av medel från Vetenskapsrådet utgår från projektet. Doktoranderna registreras i augusti 2008.

**Relation mellan pågående och fortsatt projekt:** Det fortsatta projektet är helt baserat på det pågående projektet. I en genomförd pilotstudie inkluderades 40 patienter med stroke och deras närstående; 19 randomiserades till interventionsgruppen som deltog i en ny klientcentrerad ADL-intervention (IG); 21 randomiserades till kontrollgruppen (KG) som deltog i ordinarie ADL-träning. Syftet var att jämföra effekten samt att utvärdera design, metodik och "sample size" för en randomiserad kontrollerad studie (RCT). Data från uppföljning vid 3 månader är analyserad och studien visade att 93% av patienterna i IG, jämfört med 64% av patienterna i KG gjorde kliniskt signifikanta förbättringar i ADL. Det var inga statistiskt signifikanta skillnader mellan grupperna avseende funktion, användning av hälso och sjukvård eller upplevelse av börda hos närstående. En "poweranalys" baserad på pilotstudien visar att 118 patienter behöver inkluderas för .80 power (alpha 0.05). För att anpassa urvalet till ett 15 % bortfall behövs 136 patienter inkluderas i en planerad RCT.

**Implementering av forskningsresultat:** Datainsamling pågår och resultat från projektet är därför inte implementerat. Dock har projektets 15 anställda arbetsterapeuter och sjukgymnaster fått en värdefull forskningserfarenhet och utvecklat en kompetens i evidensbaserad rehabilitering. Den nya interventionen som utvärderats i pilotstudien är teoribaserad och utvecklad i nära samarbete mellan forskare och de arbetsterapeuter som utförde interventionen. Deras implementeringsprocess studeras av en magisterstudent.



## Forskningsprogram

*Läs anvisningarna! Följ dem noggrant. Maximal utrymme 10 A4-sidor, inkluderande referenser. Använd nedanstående rubriker. Text kan kopieras från andra dokument. Obs! Formatera till Arial 11 punkter och radavstånd 1,5. Börja skriv på raden under rubriken.*

### 1. Frågeställning/Hypotes

Is there a difference in ADL dependence / independence, life-satisfaction, caregiver burden and use of home help service between people with stroke that receive a client-centered ADL intervention compared to those that receive ordinary ADL training? The a priori hypothesis is that people with stroke that receive a client-centered ADL intervention will be less dependent in ADL and perceive higher life-satisfaction than those who receive ordinary ADL training. Furthermore the significant others of people with stroke that receive a client centered ADL intervention will perceive lower caregiver burden and higher life-satisfaction than significant others of those that receive ordinary ADL training. In addition a lower use of home help service is expected among people with stroke that receive a client centered ADL intervention than among those that receive ordinary ADL-training.

### 2. Målsättning

To develop, evaluate and implement a new client-centred ADL intervention aiming to enable functioning in ADL and perceptions of life-satisfaction in people with stroke and to reduce caregiver burden and enable life-satisfaction among their significant others. The aim is also to describe how people with stroke and their significant others experience functioning in ADL during the studied process and to explore the participating therapists' implementation of the ADL intervention in to clinical practice.

### 3. Bakgrund

The annual incidence of stroke in Sweden is approximately 25.000 and about 6 percent of the total amount of inpatient hospital care is used for care and rehabilitation of patients with stroke (1). The increase of the elderly in the population is expected to lead to a 30% increase of stroke incidence until 2010. There is international consensus on how to organise the acute care after stroke. Care in stroke-units in comparison with other types of acute care, leads to an increase in survival, independence in ADL and a decrease in need of care in nursing homes (1,2). A recent Swedish study of the life situation two years after stroke (3) showed that the accessibility of rehabilitation services had decreased in the last few years and thirty-seven percent perceived unmet rehabilitation needs, and women had significantly more unmet needs than men. The amount of informal care was high, which is in

**FoUU-kansliet**

1  
2  
3  
4 concordance with international studies (4). More than half of significant others assisted in  
5 ADL and their life-situation was characterized by experience of constraint and needs of  
6 respite in everyday life (3). Functioning in ADL is associated with experiences of life  
7 satisfaction among patients with stroke and their close relatives (5-8). One way to decrease  
8 the caregiver-burden might be to focus rehabilitation interventions on improving the  
9 functioning in ADL of people with stroke. Thus the goal of rehabilitation after stroke is  
10 frequently defined as improving functioning (i.e. body function, activity and participation) and  
11 well-being (9) and one way of reaching this goal is to focus rehabilitation on improving ability  
12 and independence in ADL (1). According to the Swedish National guidelines for stroke-care  
13 (1) evidences of the effect of rehabilitation interventions are weak, especially concerning  
14 training of motor function. There is, however, evidence for task specific training and  
15 intervention focusing on ADL and social participation. Occupational therapy (OT) focusing  
16 on improving ADL after stroke can advance the performance and reduce the risk of  
17 deterioration in ADL-ability (10-12) and one of the most frequent rehabilitation interventions  
18 after stroke is ADL-training (13). However, the aims and strategies of the interventions vary  
19 and are sparsely described and the effects on caregiver burden and perceived life  
20 satisfaction are not known (10-12). Despite the evidence of beneficial effects of OT in  
21 improving personal ADL after stroke the rationale and strategies for the self-care  
22 interventions included in the randomised controlled trials are often vaguely defined and  
23 sparsely described (11,12). Rehabilitation interventions aiming to increase ability and  
24 independence in ADL need to be better defined as it might otherwise be hard for  
25 rehabilitation professionals to implement the studied interventions into clinical practice (14).  
26  
27  
28  
29  
30  
31  
32  
33  
34  
35  
36  
37  
38  
39  
40

41 Furthermore, the effects of such interventions should be assessed both in regard to patient  
42 outcome, and resource use of health care services, and in regard to caregiver burden and  
43 perceived life satisfaction both among people with stroke and their significant others. Recent  
44 research on how to improve the implementation of evidence from research into clinical  
45 practice has highlighted the difficulties and it is suggested that if clinicians can influence the  
46 development of new interventions in close collaboration with researchers, it is likely that the  
47 interventions will be more easily implemented into clinical practise i.e. through participatory  
48 action research (15).  
49  
50  
51  
52  
53  
54

55 As part of an ongoing prospective study of rehabilitation after stroke in which 376 people  
56 were included during one year at the stroke units at Karolinska University hospital a pilot  
57 study was conducted evaluating the effect of a client-centred self-care intervention – the  
58  
59  
60

CCSCI. The intervention was developed in collaboration between clinicians and researchers and included in the study were people with stroke who during the first week after stroke were dependent in self-care activities and in need of ADL-intervention. A client-centred approach was used (16) which embraces respect for clients and recognition of their experience and knowledge. The client may be defined as a single client or as a couple or family. In this project the perspectives of the people with stroke and their significant others are in focus.

A second aim of the pilot study was to evaluate design and methods for a RCT. Results from the pilot study showed that 93% of those that received the CCSCI made clinically significant improvements compared 64% with ordinary ADL training. The study found the design and methods to be appropriate for a large scale RCT of the CCSCI with some modifications suggested as a result of the pilot study. For example, it seems of importance to evaluate the client centred ADL intervention in different phases of the post-acute rehabilitation process and therefore the intervention should include more varied activities than what was the case in the pilot study focusing on self-care activities. The RCT will include both self-care or personal ADL (P-ADL) and instrumental ADL (I-ADL) (17).

In the RCT an extended inclusion procedure will be applied:

- A)** people with decreased independence in ADL will be eligible up to 3 months after stroke. In addition to the participating rehabilitation clinics in the pilot study the client-centred ADL intervention and the control-intervention will be delivered by home rehabilitation teams.
- B)** People with stroke who had their most recent stroke more than 6 months ago and who have decreased independence in ADL and have identified one or two ADL in which they aim to be independent will be recruited in order to study the effect of client-centred ADL intervention in people where the natural recovery after stroke is expected to be minimal if any. For this group both the client-centred ADL intervention and the ordinary ADL training will be delivered in outpatient clinics at Karolinska University hospital, and in primary health care centers either in the clinic or in the participants' home based on the preferences of the participants.

#### **4. Design och metoder**

**Sample and selection:** Participants will be recruited :

- A)** from the stroke units at Karolinska University Hospital using the following criteria: a) a recent stroke <3 months ago, b) dependent in at least two personal or instrumental ADL domains according to Katz Extended ADL Index (18), c) referred for rehabilitation to

**FoUU-kansliet**

1) one of the participating home rehabilitation teams, 2) or one of the participating rehabilitation clinics d) >23 score on Mini-Mental State examination (MMSE) (19), e) language ability sufficient to understand questions and instructions. Participants will be consecutively recruited and asked to invite a significant other when applicable.

**B)** People who more than 6 months after a stroke perceive a reduced independence in ADL, personal or instrumental, will be recruited through advertisements at Karolinska University hospital department of neurology at both Solna and Huddinge, primary health care centers, the website of the patient organizations Strokeförbundet and NHR (Neurologiskt Handikappades Riksförbund). Eligible will be those fulfilling the criteria a) diagnosed with stroke more than 6 months ago b) >23 score on MMSE (19), c) language ability sufficient to understand questions and instructions d) dependent in at least two personal or instrumental ADL domains. Participants will be consecutively recruited and asked to invite a significant other when applicable.

After informed consent has been obtained, baseline assessments will be performed and thereafter the participants will be randomly assigned to either the intervention group receiving the client-centred ADL-intervention, or to the control group receiving ordinary ADL-training. Randomisation will be stratified by time since most recent stroke i.e., < 3 months or >6 months, and for group A by place in which the intervention is to take place i.e., in the rehabilitation clinic or at home delivered by a home rehabilitation team.

Data will be collected at follow-ups at 3 months and at 12 months after stroke for group A and 3 and 12 months after baseline assessment for group B by a research OT or PT blinded to the participants' group belonging.

In addition qualitative studies will be conducted as has been recommended in the context of complex interventions studied in RCTs in order to capture the processes involved (20). A few of the participants in both groups (e.g. people with stroke and their significant others) (n=20) will be asked to also participate in a qualitative interview study. The aim is to select a group of participants with varying age, gender and ADL functioning to explore their experiences of the ADL- intervention they receive. The occupational therapists delivering the client centred ADL intervention will also be asked to participate in a qualitative study as informants, aiming to explore the therapists implementation of the ADL intervention, based on interviews (individual and group interviews), protocols and field-notes.

**Data collection:**

*Patients:* Motor function will be assessed using, Nine-hole peg test (21) and timed 10m walk (22); aspects of ADL and social participation using the Katz Extended ADL Index (18), Barthel Index (23) and the Frenchay Activity Index (24); Assessment of Motor and Process Skills (17) Occupational Gaps Questionnaire (25) impact of stroke using the Stroke Impact Scale (SIS) (26) a proxy version of SIS will be used if the patient is unable to answer due to cognitive or language impairments (27); and perceived life satisfaction using the LiSat-11 (28). Qualitative interview data will be collected based on an interview guide with semi-structured questions (29).

*Significant others:* At each of point of data collection, caregiver burden will be assessed by using the Caregiver's Burden Scale (6); and perceived life satisfaction using the LiSats-11 (28). Qualitative interview data will be collected based on an interview guide with semi-structured questions (29).

*Health care utilization:* Information of resource utilization of inpatient and outpatient care and rehabilitation will be collected from the Stockholm County Council computerized register. Data regarding health related services delivered by the municipality will be collected from the municipality documents. Type of interventions used in rehabilitation will be collected by telephone interviews with the responsible therapists. At each point of data collection a structured interview protocol regarding use of health related services from the municipality e.g., home-help service, transportation permits and informal care and patient satisfaction, and perceived needs of rehabilitation and support will be used (30).

A detailed intervention protocol will be used and filled in by each occupational therapist in charge of the client-centered ADL. In addition, information in medical records will be used to identify the rehabilitation interventions received by the CG and IG.

Data to the qualitative study of the therapists' implementation of the intervention in clinical practice will be collected during the studied process. Both interviews (individual and group interviews) , protocols and field-notes will be collected based on semi-structured interview guides (29).

**Client-centred ADL-intervention:** Participants randomly assigned to the intervention group (IG) will participate in the client-centred ADL-intervention ( $\leq 10$  sessions x 60 minutes

**FoUU-kansliet**

conducted during 2-3 weeks) delivered by specifically trained (5-day course designed for this project) OTs **A:** at the rehabilitation clinics or home rehabilitation teams involved in the project. **B:** by OTs in the participants' home or in outpatient clinic at Karolinska University hospital or at a primary health care.

The the CCSCI ADL-intervention will be conducted within a client-centred context i.e., training is adjusted to the individual's ability, motivation, perceptions and needs and in close collaboration between patient and therapist, which is in line with findings from previous studies (16). Significant others e.g., close relatives will be invited to collaborate. Participants will learn to use a global problem-solving strategy (31) to handle their difficulties in ADL-performance. Participants will first identify three goals for activities they want and need to perform, based on the Canadian Occupational Performance Measure COPM (32), and then learn how to use a *goal-plan-do-check* strategy (31). The next step is to do the first activity and to discover and identify difficulties in reaching the goal. Thereafter, the participant and therapist will identify domain specific strategies that will enable successful performance of the chosen activity. Different types of strategies will be used such as conscious strategies aiming to solve problems (31), finding new ways (compensation) to perform ADL and/or modifying the environmental demands to enable performance (17). The participant plans and implements the new domain specific strategies in the performance until the goal is reached in the first activity and will then continue to use the *goal-plan-do-check* strategy in a new activity. At the last session the therapist and patient review, discuss and evaluate all the strategies implemented during the 10 sessions in order to enable the participants to transfer learning to new activities and situations outside therapy (33).

**Ordinary ADL-intervention:** The participants randomly assigned to the control group (CG) will participate in ordinary ADL-training, which means that the intervention will vary in extent and methodology according to the routines and praxis at the clinic or in the home rehabilitation team, but also with the knowledge and clinical experience of the individual occupational therapist. The control group in B will receive ( $\leq 10$  sessions x 60 minutes conducted during 2-3 weeks) by OTs not educated and trained in the client centred intervention. For participants in group A the total amount of rehabilitation will follow the ordinary rehabilitation program at the clinic including all rehabilitation needed except the new client centred intervention.

**Data-analysis:** The number of participants to be included is based on analysis of data from the 3 months follow-up of the pilot study; a difference in proportion making a clinically significant improvement and accommodating for a 15% drop out rate (alpha set to 0.05 and the beta at 0.80) calls for the inclusion of 136 participants.

Qualitative data (from people with stroke, significant others and participating therapists) based on interviews, protocols and field-notes will be analysed using a constant comparative approach (34) aiming to identify patterns of similarities and differences and change in experience over time.

**Ethical considerations:** Ethical approval for the study has been obtained; # 2005/1462-31/3. One ethical dilemma can be that the participants selected for the control group could perceive that they will not receive the best intervention available. There is, however, evidence that "non specified" ADL-training is effective and the control-group will receive ordinary ADL-training. The data collected in this project (the instruments) will be based on the participants' perceptions of functioning and life-satisfaction and one ethical dilemma could be that the questionnaires could arouse feelings of anxiety and sadness and the questions could hurt their integrity. Our experience is, however, that most participants like to share their experiences from their everyday situation with experienced therapists involved in research.

##### **5. Patientnytta** (Här skall redovisas plan för implementering av förväntade resultat, projektets kliniska förankring och generaliserbarheten av förväntade resultat)

This project is based on our previous research and lies in the cutting edge of national and international multidisciplinary research on rehabilitation after stroke and is in agreement with the Swedish national guidelines for stroke-care 2005 (1). The result from this project will contribute to the theory development in the area of stroke rehabilitation and will serve as a basis for the implementation of a new client centred intervention in ADL that by teaching a strategy for problem solving in everyday life will enable people with stroke to solve their ADL-difficulties as they are encountered, and as a consequence thereof reduce the caregiver burden without increasing the use of health care services. Furthermore the design of the study using a participatory research approach and involving both specialized care, primary health care centres and home rehabilitation teams will facilitate the implementation of the intervention into clinical praxis. The population recruited and that will benefit from the intervention is thought to be representative of approximately 25-40% of the stroke population.

## 6. Referenser

1. Socialstyrelsen. Socialstyrelsen riktlinjer för strokesjukvård 2005.
2. The stroke unit trialists' Collaboration. Collaborative systematic review of the randomised trials of organised inpatient (stroke unit) care after stroke. *BMJ* 1997;314:1151-1159.
3. Socialstyrelsen. Livssituationen två år efter stroke. Report [www.socialstyrelsen.se](http://www.socialstyrelsen.se) 2004.
4. Palmer S, Glass T. Family functioning and stroke recovery: A review. *Rehabil Psychol* 2003;48:255-265.
5. Bränholm I-B, Lundmark P, Månsson M, Fugl-Meyer AR. On life satisfaction in subjects with neurological disorders. *Neurol Rehabil* 1996;2:63-67.
6. Elmståhl S, et al. Caregiver's burden of patients 3 years after stroke assessed by a novel caregiver burden scale. *Arch Phys Med Rehabil* 1996;77:177-182.
7. Eriksson G, Tham K, et al. Couples' happiness and its relationship to functioning in everyday life after brain injury. *Scand J Occup Ther* in press
8. Forsberg-Wärleby G, Möller A, Blomstrand C. Life satisfaction in spouses of stroke patients during the first year after stroke. *J Rehabil Med* 2004;36:4-11.
9. WHO. International classification of functioning, disability and health: ICF. Geneva: World Health Organisation: 2001
10. Unsworth A, Cunningham T. Examining the evidence base for occupational therapy with clients following stroke. *Br J Occup Ther* 2002;65:21-29.
11. Legg LA, Drummond A, Leornaridi-Bee J, Gladman JR, Corr S, Donkervoort M, et al. Occupational therapy for patients with problems in personal activities of daily living after stroke: systematic review of randomised trials. *BMJ* 2007;335:922
12. Steultjens E, Deeker J, Bouter L, van de Nes J, Cup E, van den Ende C. Occupational therapy for stroke patients. A systematic review. *Stroke* 2003;34:676-687.
13. Neistadt ME. Treatment activity preferences of occupational therapists in adult physical dysfunction settings. *Am J Occup Ther* 1995;49:437-443.
14. Craik J, S. R. Theory of research utilization enhancement: A model for occupational therapy. *Can J Occup Ther* 2003;70:266-275
15. Taylor R, Braveman B J H. Developing and evaluating community-based services through participatory action research: Two case examples. *Am J Occup Ther* 2004;58:73-82.
16. Townsend E, (Ed). *Enabling occupation, An occupational therapy perspective*. 2<sup>nd</sup> ed. Ottawa: CAOT Publications ACE; 2002.



17. Fisher A. Assessment of Motor and Process Skills. 2nd ed. Fort Collins: Three Star Press CO; 2006.
18. Hulter Åsberg K, Sonn U. The cumulative structure of personal and instrumental ADL. *Scand J Rehabil Med* 1989;21:171-177
19. Folstein M, Folstein S, Mc Hugh P. Mini-mental state; a practical method for grading cognitive state of patients for the clinician. *J Psychiatr Res* 1975;12:189-198.
20. McKewitt C, Redfern J, Mold F, Wolfe C. Qualitative studies of stroke. a systematic review *Stroke* 2004; 1499-1505
21. Mathiowetz V, Weber K, Kashman N, Volland G. Adult norms for the Nine Hole Peg Test of finger dexterity. *Occup Ther J Res* 1985;5:24-38.
22. Wade DT, et al. Walking after stroke: measurement and recovery over the first 3 months. *Scand J Rehabil Med* 1987;19:25-30.
23. Mahoney F, Barthel D. Functional evaluation: The Barthel Index. *Md St Med J* 1965;14:61-65.
24. Wade DT, Legh-Smith J, Langton Hower R. Social activities after stroke: measurement and natural history using the Frenchay Activities Index. *Int Rehabil Med* 1985;7:176-181.
25. Eriksson G, Tham K, Borg J. Occupational gaps in everyday life one to four years after acquired brain injury. *J Rehabil Med* 2006;00:1-7
26. Duncan PW, et al. The stroke impact scale version 2.0: evaluation of reliability, validity, and sensitivity to change. *Stroke* 1999;30:2131-2140.
27. Duncan PW, Lai S, Tyler D, Perera S, Reker D, Studenski S. Evaluation of proxy responses to the Stroke Impact Scale. *Stroke* 2002;33:2593-2599
28. Fugl-Meyer AR, et al. Life satisfaction in 18- to 64-year-old Swedes: in relation to gender, age, partner and immigrant status. *J Rehabil Med* 2002;34:239-246.
29. Kvale S. Interviews: an introduction to qualitative research interviewing. Thousand Oaks Calif: sage;2007.
30. Widén Holmqvist L, von Koch L, de Pedro-Cuesta J. Use of health care, impact on family caregivers and patient satisfaction of rehabilitation at home after stroke in Southwest Stockholm. *Scand J Rehabil Med* 2000;32:164-170.
31. Polatajko HJ, Mandich AD, Missiuna C, Miller LT, Macnab JJ, Malloy-Miller T, et al. Cognitive orientation to daily occupational performance (CO-OP): Part III- The protocol in brief. *Phys Occup Ther Pediatr* 2001;20:107-123.
32. Law M, Baptiste S, McColl M, Opzoomer A, Polatajko H, Pollock N. Canadian

**FoUU-kansliet**

Occupational Performance Measure: an outcome measure for occupational therapy.

Can J Occup Ther 1990;57:82-87.

33. Trombly C, Ma H. A Synthesis of the effects of occupational therapy for persons with stroke, Part 1: Restorations of roles, tasks, and activities. Am J Occup Ther 2002;56:250-259.
34. Glaser B, Strauss A. The discovery of grounded theory: strategies for qualitative researchers. New York: Aldine de Gruyter;1967.

**FoUU-kansliet****26. Beskrivning av genusperspektivet**

**Läs anvisningarna!** Följ dem noggrant. **Maximal utrymme ½ A4-sida. Text kan kopieras från andra dokument. Formatera till Arial 11 punkter, radavstånd 1,5. Börja skriva på raden under**

En nyligen genomförd svensk studie som inkluderade personer med stroke och deras närstående och som undersökte deras livssituation två år efter insjuknandet i stroke (3) visade att det är skillnad mellan mäns och kvinnors (patienters) behov av stöd i vardagen. Fler kvinnor än män ansåg sig ha behov av rehabiliteringsåtgärder vilket tyder på att deras behov av åtgärder inte tillgodosetts. Eftersom projektets långsiktiga mål är att utveckla och genomföra evidensbaserad rehabilitering med syfte att ge den enskilda individen en meningsfull vardag så kommer skillnader mellan könen särskilt beaktas både vad avser patienter men också för närstående. Vi kommer att genomföra jämförande analyser mellan män och kvinnor och särskilt studera genusaspekter på ADL-funktion, livstillfredsställelse och behov och resursanvändning av hälso- och sjukvård, social service men också informell vård och genusaspekters påverkan på informella vårdgivare vad avser livstillfredsställelse och "caregiver burden".

## Resurser, nätverk, infrastruktur och annan finansiering

### (ex. företagssponsring)

*Läs anvisningarna! Följ dem noggrant. Maximal utrymme en A4-sida. Text kan kopieras från andra dokument. Formatera till Arial 11 punkter, radavstånd 1,5. Börja skriva på raden under rubriken.*

#### Styrkor:

- Forskargruppen (KT, LvK, MA, SG, LY) är multiprofessionell (arbetsterapeuter, sjukgymnaster, läkare) och har ett etablerat och nära samarbete.
- Projektet har ringa behov av utrustning förutom redan befintlig utrustning (datorer, server och utrymmen för förvaring av rådata inom Karolinska Institutet och Karolinska Universitetssjukhuset.
- Arbetsterapikliniken (chefsarbetsterapeut Monika Samuelsson) vid Karolinska Universitetssjukhuset och Sektionen för arbetsterapi (sektionschef Kerstin Tham), Institutionen Neurobiologi, vårdvetenskap och samhälle, KI, har etablerat ett nära samarbete och kommer tillsammans att ansvara för personal frågor och ekonomin inom projektet.
- Forskargruppen har etablerat internationellt samarbete inom forskningsområdet och delar av projektet kommer att genomföras i nära samarbete med Washington University, St Louis, US (Professor Carolyn Baum) och University of Toronto, Canada (Professor Helene Polatajko).
- Lena von Koch har medverkat som styrelseledamot 1991-2004 i Strokeförbundet och har ett väl etablerat samarbete och nätverk vilket kommer att underlätta rekrytering av deltagare till del B.

#### Begränsningar:

- Forskargruppen behöver etablera ett nära samarbete utanför Karolinska Institutet och Karolinska Universitetssjukhuset med primärvården för personer i kommunens boenden för att kunna genomföra de och kommunala vårdgivare utanför Karolinska Universitets sjukhuset och Karolinska Institutet.

#### Research context:

Forskningen kommer att bedrivas och använda flera olika kliniker inom Karolinska Universitetssjukhuset både Neurologi, Geriatrik och Sjukgymnastik. Dessa kliniker samarbetar nära med Arbetsterapikliniken. Sektionen för Arbetsterapi KI kommer att utgöra forskningsprojektets akademiska hemvist och där projektets ekonomi kommer att

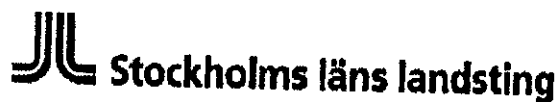

**Stockholms läns landsting**

**FoUU-kansliet**

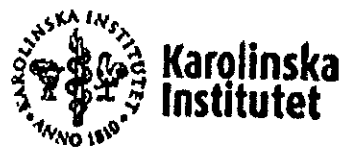

**Karolinska  
Institutet**

administreras. Utrymmen för välorganiserade projektmöten finns för planering och informationsutbyte inom forskargruppen. Alla deltagande forskare är välintegrerade i gruppen och samarbetet etablerat genom redan pågående forskningssamarbete och med med ansvariga för vård vid strokeenheter på Karolinska Universitetssjukhuset.

## Motiverad kostnads kalkyl

Läs anvisningarna! Följ dem noggrant. Maximal utrymme en A4-sida. Använd nedanstående rubriker. Text kan kopieras från andra dokument. Formatera till Arial 11 punkter, radavstånd 1,5. Börja skriv på raden under rubriken.

### 1. Personalkostnader Inkl Lkp (Klinisk forskningstid i månader anges för varje person som medel söks för)

**2009: Summa löner=960.000 kr**

Susanne Guidetti, 6 mån, leg.arbter., Karolinska Univ.sjh. (6x29x1.46=254.000 kr)

Charlotte Ytterberg, 6 mån, leg.sjukgymn., S-t Görans sjukhus (6x29x1.46=254.000 kr)

Fyra leg arbetsterapeuter, totalt 9 mån, Karolinska Univ.sjh. (9x25x1.46=329.000 kr)

Lena von Koch, 2 mån, universitetslektor, Karolinska Institutet (2x40x1.546=123.000 kr)

**2010: Summa löner=960.000 kr**

Susanne Guidetti, 6 mån, leg.arbter., Karolinska Univ.sjh. (6x29x1.46=254.000 kr)

Charlotte Ytterberg, 6 mån, leg.sjukgymn., S-t Görans sjukhus (6x29x1.46=254.000 kr)

Fyra leg arbetsterapeuter, totalt 9 mån, Karolinska Univ.sjh. (9x25x1.46=329.000 kr)

Lena von Koch, 2 mån, universitetslektor, Karolinska Institutet (2x40x1.546=123.000 kr)

**2011: Summa löner=813.000**

Susanne Guidetti, 6 mån, leg.arbter., Karolinska Univ.sjh. (6x29x1.46=254.000 kr)

Charlotte Ytterberg, 6 mån, leg.sjukgymn., S-t Görans sjukhus (6x29x1.46=254.000 kr)

Fyra leg arbetsterapeuter, totalt 5 mån, Karolinska Univ.sjh. (5x25x1.46=182.000 kr)

Lena von Koch, 2 mån, universitetslektor, Karolinska Institutet (2x40x1.546=123.000 kr)

### 4. Övriga kostnader

Resekostnader i samband med hembesök för intervention och datainsamling,

Två månadskort (SL) per månad och år 24x650 kr=15.600 kr/år= 46.800 kr

### 5. Motivering

SG, LY, och LvK ansvarar för/utför planering och genomförande av projekt. LvK (senior forskare, dispens sedan tidigare) leder genomförandet. Arbetsterapiklinikens arbetsterapeuter (AT) (n=4) ansvarar för intervention i B-gruppen och datainsamling i A-gruppen (baslinje, 3, 12 mån efter insjuknande). Jan-aug 2009, planering av projekt, kurs för AT som ska utföra intervention (A- och B-grupp). Sept 2009 -oktober 2010, inklusion, intervention, datainsamling och inläggning av data. Okt 2010-okt 2011 datainsamling, inläggning av data. Nov-dec 2011 bearbetning, analys av data.

## Vetenskaplig kompetens

Läs anvisningarna! Följ dem noggrant. Text kan kopieras från andra dokument. Använd nedanstående rubriker. Formatera till Arial 11 punkter, radavstånd 1,5.

### 1. Publikationsförteckning för huvudsökande

Numrera och sortera publikationsförteckningen kronologiskt under nedanstående rubriker. Publikationsförteckningen förtecknas enligt Vancouversystemet med angivande av författarnamn, arbetets titel osv. Börja skriv på raden under rubriken.

#### Förteckning över originalarbeten åren 2003-2007

1. Gahnström-Strandqvist K, Liukko A, **Tham K**. The meaning of the working cooperative for persons with long-term mental illness. *American Journal of Occupational Therapy*, 2003;57, 262-272.
2. **Tham K**, Kielhofner, G. Impact of the social environment on occupational experience and performance among persons with unilateral neglect. *American Journal of Occupational Therapy* 2003;57:403-412.
3. Lampinen J, **Tham K**. Interaction with the physical environment in everyday occupation after stroke: a phenomenological study of visuospatial agnosia. *Scandinavian Journal of Occupational Therapy* 2003;0: 147-156.
4. Erikson A K, Karlsson G, Söderström M, **Tham K**. A Training apartment with electronic aids of daily living: Lived experiences of persons with brain damage. *American Journal of Occupational Therapy* 2004; 58: 261-271.
5. Patomella A-H, Caneman G, Kottorp A, **Tham K**. Identifying scale and person response validity of a new assessment of driving ability. *Scandinavian Journal of Occupational Therapy* 2004;11: 70-77.
6. Wohlin Wottrich A, Stenström CH, Engardt M, **Tham K**, von Koch L. Characteristics of physiotherapy sessions from the patient's and therapist's perspective. *Disability and Rehabilitation* 2004;26:1198-1205.
7. Appelros P, Karlsson G, Thorwalls A, **Tham K**, Nydevik I. Unilateral neglect: Further validation of the baking tray task. *Journal of Rehabilitation Medicine* 2004; 36:258-261.

**FoUU-kansliet**

8. Andersson-Svidén G, **Tham K**, Borell L. Elderly participants of social and rehabilitative day centres. *Scandinavian Journal of Caring Sciences* 2004;18:1-9.
9. Gahnström-Strandqvist K, Josephsson S, **Tham K**. Stories of clients with mental illness: The structure of occupational therapists interactions. *OTJR: Occupation, Participation and Health* 2004;134-143.
10. Eriksson G, **Tham K**, Fugl-Meyer AR. Couples' happiness and its relationship to functioning in everyday life after acquired brain injury. *Scandinavian Journal of Occupational Therapy* 2005;12:40-48.
11. Johansson U, **Tham K**. The meaning of work after acquired brain injury. *American Journal of Occupational Therapy* 2006; 60:60-69.
12. Eriksson G, **Tham K**, Borg J. Occupational gaps in everyday life one to four years after acquired brain injury. *Journal of Rehabilitation Medicine* 2006;38:1-7.
13. Patomella A-H, **Tham K**, Kottorp A. P-drive - an assessment of driving performance after stroke. *Journal of Rehabilitation Medicine* 2006; 38: 273-279.
14. Karlsson G , **Tham K**. Correlating facts or interpreting meaning: Two different epistemological projects within medical research. *Scandinavian Journal of Occupational Therapy* 2006;13:68-75.
15. Guidetti S, Asaba E, **Tham K**. The lived experience of recapture self care after stroke or spinal cord injury. *American Journal of Occupational Therapy* 2007;61:303-310.
16. Erikson, A, Karlsson, G., Borell, L. & **Tham, K**. (2007). The lived experience of memory impairment in daily occupation after acquired brain injury. *OTJR: Occupation, Participation and Health*, 27, 3, 84-94.
17. Wohlin-Wottrich A, von Koch L, **Tham K**. The Meaning of Rehabilitation in the Home Environment After Acute Stroke From the Perspective of a Multi-professional Team. *Physical Therapy* 2007; 67: 778-788.



18. Ekstam L, Uppgard B, von Koch L, **Tham K**. Functioning in everyday life after stroke: A longitudinal study of elderly people receiving rehabilitation at home. *Scandinavian Journal of Caring Science* 2007; 21:434-446.

19. Ekstam L, Kottorp A, **Tham K**. The relationship between awareness of disability and occupational performance during the first year subsequent to stroke. *American Journal of Occupational Therapy* 2007;61:503-511.

**Förteckning över tio viktigaste och mest relevanta originalarbetena åren 1998 - 2007**

**Tham K**, Borell L, Gustavsson A. The discovery of disability: A phenomenological study of unilateral neglect. *The American Journal of Occupational Therapy* 2000;4: 398-406.

**Tham K**, Ginsburg E, Fisher AG, Tegnér R. Training to improve awareness of disability in clients with unilateral neglect. *The American Journal of Occupational Therapy*, 2001;55: 46-54.

Guidetti S, **Tham K**. Therapeutic strategies used by occupational therapists in self-care training: A qualitative study, *Occupational Therapy International* 2002;9: 257-276.

Wohlin Wottrich A, Stenström CH, Engardt M, **Tham K**, von Koch L. Characteristics of physiotherapy sessions from the patient's and therapist's perspective. *Disability and Rehabilitation* 2004;26: 1198-1205.

Eriksson G, **Tham K**, Fugl-Meyer A.R. Couples' happiness and its relationship to functioning in everyday life after acquired brain injury. *Scandinavian Journal of Occupational Therapy* 2005;12: 40-48.

Guidetti S, Asaba E, **Tham K**. The lived experience of recapture self care after stroke or spinal cord injury. *American Journal of Occupational Therapy* 2007; 61:303-310.

Erikson, A, Karlsson, G., Borell, L. & **Tham, K.** (2007). The lived experience of memory impairment in daily occupation after acquired brain injury. *OTJR: Occupation, Participation and Health*, 27, 3, 84-94.

**FoUU-kansliet**

Ekstam L, Kottorp A, **Tham K**. The relationship between awareness of disability and occupational performance during the first year subsequent to stroke. *American Journal of Occupational Therapy* 2007;61:503-511.

Ekstam L, Uppgard B, von Koch L, **Tham K**. Functioning in everyday life after stroke: A longitudinal study of elderly people receiving rehabilitation at home. *Scandinavian Journal of Caring Science* 2007; 21:434-446

Wohlin-Wottrich A, von Koch L, **Tham K**. The meaning of rehabilitation in the home environment after acute stroke from the perspective of a multi-professional team. *Physical Therapy* 2007; 67: 778-788.

**Översiktsartiklar, publikationer/rapporter (o) abstracts) av relevans åren 1998 - 2007**

Kielhofner G, Borell L, **Tham K**. Preparing scholars of practice around the world. *Occupational Therapy Practice* 2002;7;13-14.

Kielhofner G, **Tham K**, Baz T, Hutson J. Performance capacity and the lived body. In G Kielhofner (Ed). *A model of human occupation. Theory and application* (3rd ed), Lippincott Williams & Wilkins, Baltimore: 2002.

## 2. Curriculum Vitae för huvudsökande

Lämna kortfattade uppgifter under nedanstående rubriker. Maximalt utrymme två A4-sidor. Text kan kopieras från andra dokument. Formatera till Arial 11 punkter, radavstånd 1,5. Börja skriv på raden under rubriken.

### a. Grundexamen, år, ämne

1978 arbetsterapi

### b. Legitimation (eller motsvarande), år

1996

### c. Specialistkompetens, år, specialitet

ej tillämpligt

### d. Disputation, år, universitet, ämne

1998, Karolinska Institutet, neurologi

### e. Docentkompetens, år, universitet, ämne

2004, Karolinska Institutet, arbetsterapi

### f. Nuvarande anställning

Universitetslektor

### g. Anknytning/koppling till landstingets verksamhet eller verksamhet vid enhet med vårdavtal med landstinget

Kliniskt arvoderad koppling vid Arbetsterapikliniken Karolinska Universitetssjukhuset

### h.Handledarskap (såväl pågående som avslutade)

Avslutade: Kitty Gahnström-Strandqvist Med dr 2003, Anette Eriksson Med lic 2005, Annica Wohlin Wottrich Med lic 2006, Gunilla Eriksson Med dr 2007,

Pågående: Susanne Guidetti disp 30 maj 2008, Ann-Helen Patomella disp 17 okt 2008, Lisa Ekstam disp 12 december 2008, Therese Eriksson reg nov 2006.

### i. Övrigt

#### Klinisk tjänstgöring som arbetsterapeut

|                                                         |           |
|---------------------------------------------------------|-----------|
| Arbetsterapeut (AT) Stureby sjukhus                     | 1979 - 81 |
| AT Huddinge sjukhus (neurologi)                         | 1981 - 82 |
| 1:e AT Karolinska sjukhuset (neurologi, stroke-enheten) | 1982 - 94 |

**FoUU-kansliet**

Klinisk lektor knuten till Rosenlunds och Dalens geriatriska kliniker, 50% **1999-2001**

Arvoderad klinisk koppling till Karolinska Universitetssjukhuset **2004- ff**

**Anställning vid Hälsohögskolan och Karolinska Institutet**

Universitetsadjunkt och universitetslektor, Arbetsterapi **1994- ff**

Forskarassistenttjänst 4 år, (50% i 8 år), Vårdalsstiftelsen, CfV **2000- 2007**

Sektionschef, sektionen för arbetsterapi, Neurotec **2002-ff**

Bitr Prefekt vid Institutionen NVS, KI **2005-ff**

**Uppdrag**

Styrelserepresentant i Stockholms Läns Stroke-förening **1986-96**

Forskarutbildningsrepresentant i Forskningsnämnd Vård,  
Karolinska Institutet. **1997-98**

Expert i Högskoleverkets utvärdering av vårdutbildningar. **1999**

Ledamot i FSA:s specialistråd **1999- 2002**

Ledamot i FSA:s stipendiefond **2001 - ff**

Granskare av rörliga doktorandtjänster, KI, 1-2 gr/år **1997 - ff**

Ledamot i Nationellt råd för stroke-team konferenser **2002-ff**

Ledamot i Styrelsen för utbildning, KI **2005-ff**

Ledamot i STROKE förbundets vetenskapliga råd **2007-ff**

**Tidigare projektanslag**

**1. Projekt:** Neuropsykologiska begränsningar efter slaganfall- En fenomenologisk studie  
Anslagsgivare: Vårdalsstiftelsen. Belopp: 750.000 kronor fördelade över tre år (2000-2002)

**2. Projekt:** Hemrehabilitering av äldre personer med stroke: En longitudinell studie av  
adaptationsprocessen. Anslagsgivare: HSN, Stockholms läns landsting. Belopp: 1.250.000  
kronor fördelade över fyra år (2000-2003)

**3. Projekt:** Adaptationsprocessen efter förvärvad hjärnskada. Anslagsgivare:  
Vetenskapsrådet. Belopp: 600.000 kronor fördelade över tre år (2002-2004)

**4. Projekt:** Adaptationsprocessen efter stroke. Anslagsgivare: Nationella forskarskolan i  
vård och omsorg. Anslag: Doktorandtjänst i fyra år, motsvarar fyra års lön (2003-2007).

**5. Projekt:** Förmåga att köra bil efter stroke. Anslagsgivare: Nationella forskarskolan i vård  
och omsorg. Anslag: Doktorandtjänst i fyra år, beloppet motsvarar fyra års lön (2004-2008).

**6. Projekt:** Rehabilitering av personer med stressrelaterade problem. Anslagsgivare:  
Nationella forskarskolan i vård och omsorg. Anslag: Doktorandtjänst i fyra år, beloppet  
motsvarar fyra års lön (2007-2011).

**7. Projekt:** Behov av rehabilitering och stöd efter stroke. Anslagsgivare Hjärnfonden.  
Belopp: 500.000 kronor (2007).

### 3. Publikationsförteckning för medsökande

Publikationsförteckningen förtecknas enligt Vancouversystemet med angivande av författarnamn, arbetets titel osv. Text kan kopieras från andra dokument. Formatera till Arial 11 punkter, radavstånd 1,5. Börja skriv på raden under rubriken.

#### Förteckning över de fem viktigaste och mest relevanta originalarbeten per medsökande åren 1998 - 2007

##### Medsökande Lena von Koch

**von Koch L**, Wohlin Wottrich A, Widén Holmqvist L. Rehabilitation in the home versus the hospital: the importance of context. *Disabil Rehabil* 1998;20:367-372.

**von Koch L**, de Pedro Cuesta J, Widén Holmqvist L. Randomized controlled trial of rehabilitation at home after stroke: one-year follow-up of patient outcome, resource use and cost. *Cerebrovasc Dis* 2001;12:131-138

Thorsén A-M, Widén Holmqvist L, de Pedro-Cuesta J, **von Koch L**. A randomized controlled trial of early supported discharge and continued rehabilitation at home after stroke: 5-year follow-up of patient outcome. *Stroke* 2005;36:297-303.

Elf M, Poutilova M, **von Koch L**, Öhrn K. Using system dynamics for collaborative design: a case study. *BMC Health Services Res* 2007; Aug 2:123

Wohlin Wottrich A, **von Koch L**, Tham K. The meaning of rehabilitation in the home environment after acute stroke from the perspective of a multi-professional team. *Phys Ther* 2007;87: 778-788. discussion 788-791 Epub April 18, 2007.

##### Medsökande Magnus Andersson

**Andersson M**, Yu M, Söderström M, Baig S, Weerth S, Solders G, Link H. Multiple MAG peptides are recognized by circulating T and B lymphocytes in polyneuropathy and multiple sclerosis. *Eur J Neurol* 2002;9:243-251.

Olsson T, Edenius C, Ferm M, Samuelson P, Torráng A, Wallström E, Khademi M, **Andersson M**, Årfors L. Depletion of TCR V beta 5.2/5.3 T cells with a humanized antibody in patients with multiple sclerosis. *European J of Neurology* 2002;9:153-164.

**FoUU-kansliet**

Danilov AI, Andersson M, Bavand N, Wiklund P, Olsson T and Brundin L. Nitric oxide metabolite determinations suggest continuous inflammation in multiple sclerosis. *J Neuroimmunol* 2003;136:112-8.

Gonzalez H, Khademi M, Andersson M, Wallström E, Pihl F, Borg K and Olsson, T. Prior poliomyelitis-ivlg treatment reduces proinflammatory cytokine production. *J Neuroimmunol* 2004;150:139-44.

Johansson S, Ytterberg C, Claesson I, Lindberg J, Hillert J, Andersson M, Widén Holmqvist L, von Koch L. High concurrent presence of disability in multiple sclerosis: Associations with perceived health. *J Neurol.* 2007;254:767-73.

**Medsökande Charlotte Ytterberg**

Ytterberg C, Andersson Malm S, Britton M. How do stroke patients fare when discharged straight to their homes? A controlled study on the significance of hospital follow-up after one month. *Scand J Rehabil Med.* 2000; 32(2): 93-6.

Claesson IM, Ytterberg C, Johansson S, Almkvist O, von Koch L. Rapid cognitive screening in multiple sclerosis accomplished by the Free Recall and Recognition Test. *Mult Scler.* 2007;13(2):272-4.

Johansson S, Ytterberg C, Claesson I, Lindberg J, Hillert J, Andersson M, Widén Holmqvist L, von Koch L. High concurrent presence of disability in multiple sclerosis: Associations with perceived health. *J Neurol.* 2007;254(6):767-73.

Ytterberg C, Johansson S, Andersson M, Olsson D, Link H, Widén Holmqvist L, von Koch L. Combination therapy with interferon-beta and glatiramer acetate in multiple sclerosis. *Acta Neurol Scand.* 2007;116(2):96-9.

Ytterberg C, Johansson S, Widén Holmqvist L, von Koch L. Longitudinal variations and predictors of increased perceived impact of multiple sclerosis, a two-year study. *J Neurol Sci.* In Press.

**Medsökande Susanne Guidetti**

Guidetti S, Söderback I. Description of self-care training in occupational therapy: Case studies of five Kenyan children with cerebral palsy. *Occup Ther Int* 2001;8:34-48.

1  
2  
3  
4  
5  
6  
7  
8  
9 **Guidetti S, Tham K.** Therapeutic strategies used by occupational therapists in self-care  
10 training: A qualitative study, *Occupational Therapy International* 2002;9: 257-276.  
11  
12

13  
14 **Guidetti S, Asaba E, Tham K.** The lived experience of recapture self care after stroke or  
15 spinal cord injury. *American Journal of Occupational Therapy* 2007: 61:303-310.  
16  
17  
18  
19  
20  
21  
22  
23  
24  
25  
26  
27  
28  
29  
30  
31  
32  
33  
34  
35  
36  
37  
38  
39  
40  
41  
42  
43  
44  
45  
46  
47  
48  
49  
50  
51  
52  
53  
54  
55  
56  
57  
58  
59  
60

#### 4. Curriculum Vitae för medsökande

Lämna kortfattade uppgifter under nedanstående rubriker. **Maximalt utrymme en A4-sida per medsökande.** Vid flera medsökande, kopiera nedanstående och lägg till en sida. Text kan kopieras från andra dokument. Formatera till Arial 11 punkter, radavstånd 1,5. **Börja skriv på raden under rubriken.**

##### Medsökandes namn:

Lena von Koch

##### a. Grundexamen, år, ämne

1970

##### b. Legitimation (eller motsvarande), år

1970

##### c. Specialistkompetens, år, specialitet

2004 specialist i neurologi sjukgymnastik

##### d. Disputation, år, universitet, ämne

2000, Karolinska Institutet i neuroepidemiologi och hälso och sjukvårdsforskning

##### e. Docentkompetens, år, universitet, ämne

2006, Karolinska Institutet, Hälso och sjukvårdsforskning

##### f. Nuvarande anställning

Universitetslektor Karolinska Institutet

##### g. Anknytning/koppling till landstingets verksamhet eller verksamhet vid enhet med vårdavtal med landstinget

Neurologiska kliniken Karolinska Universitetssjukhuset, Huddinge

##### h.Handledarskap (såväl pågående som avslutade)

Ann-Mari Thorsén Med lic 2005, Ulrika Einarsson Med dr 2006, Annica Wohlin Wottrich, Med lic 2006, Kristina Gottberg Med dr 2006, Charlotte Ytterberg planerad disputation 080605, Sverker Johansson planerad disputation 080613, Elizabeth Peterson disputation planerad 2009, Catharina Gustavsson halvtid 080425.

##### i. Övrigt

Lena von Koch har stor erfarenhet av att leda forskningsprojekt och att arbeta såväl kliniskt som med forskning för personer med stroke.

Erhållna projektmedel som huvudsökande



- A longitudinal cohort study of function, activity, participation and resource utilization of health related services in multiple sclerosis. Vetenskapsrådet anställning som FoU-ass 2003-2006 (4 x 584 000).
- A longitudinal cohort study of function, activity, participation and resource utilization of health related services in multiple sclerosis. Vetenskapsrådet projektbidrag (2003-2006)
- A longitudinal cohort study of function, activity, participation and resource utilization of health related services in multiple sclerosis. Neurologiskt handikappades Riksförbund, 2003 och 2004. (sammanlagt 120 000)
- Sub-contractor i EU-projekt "A VR based system to allow matching of an optimum interface to a User of Assistive Technology" ,, (40 000 €)
- En longitudinell studie av funktion, aktivitet och delaktighet samt resursanvändning av hälso och sjukvård hos personer med multipel skleros. Anslag: Doktorandtjänst i fyra år, samt "ryggsäck" (2004-2008) .
- Patienters och närståendes behov av rehabilitering efter stroke, Gun och Bertil Stohne stiftelsen 30t, 2006 .

*Programansvarig och koordinator av forskarutbildningsprogrammet i vård och omsorg Karolinska Institutet.*

#### **4. Curriculum Vitae för medsökande**

##### **Medsökande, namn:**

Magnus Andersson

##### **a. Grundexamen, år, ämne**

Läkarexamen, 1984, Karolinska Institutet

##### **b. Legitimation (eller motsvarande), år**

1987

##### **c. Specialistkompetens, år, specialitet**

1995, Neurolog

##### **d. Disputation, år, universitet, ämne**

1994, Karolinska Institutet, Patologi

##### **e. Docentkompetens, år, universitet, ämne**

2002, Karolinska Institutet, Klinisk neurologi

FoUU-kansliet

**h. Nuvarande anställning**

Överläkare, Läkarchef och ansvarig för ST-läkarutbildningen vid Neurologiska kliniken, Karolinska Universitetssjukhuset i Solna

**g.Handledarskap (såväl pågående som avslutade)**

Bihandledare: Henrik Gonzales, Charlotte Ytterberg

**f. Övrigt**

Magnus Andersson har mycket stor erfarenhet av kliniskt arbete inom neurologikliniken samt forskning inom detta område. Har en viktig roll som medicinsk neurologisk expert inom projektet och har ett bra nätverk med alla läkare och även stroke-team inom Karolinska Universitetssjukhuset.

**4. Curriculum Vitae för medsökande**

Lämna kortfattade uppgifter under nedanstående rubriker. **Maximalt utrymme en A4-sida per medsökande.** Vid flera medsökande, kopiera nedanstående och lägg till en sida. Text kan kopieras från andra dokument. Formatera till Arial 11 punkter, radavstånd 1,5. **Börja skriv på raden under rubriken.**

**Medsökande, namn**

Charlotte Ytterberg

**a. Grundexamen, år, ämne**

Leg sjukgymnast, 1991

**b. Legitimation (eller motsvarande), år**

1991

**c. Specialistkompetens, år, specialitet**

2003 specialist i neurologi sjukgymnastik

**d. Disputation, år, universitet, ämne**

Planerad disputation 080605

**e. Docentkompetens, år, universitet, ämne****i. Nuvarande anställning**

Capio S:t Görans sjukhus AB

**g) Anknäytning/koppling till landstingets verksamhet eller verksamhet vid enhet med vårdavtal med landstinget**

Verksam vid S:t Görans sjukhus med vilken landstinget har vårdavtal

**h) Handledarskap (såväl pågående som avslutade)**

**i) Övrigt**

Lotta Ytterberg har stor klinisk erfarenhet av att arbeta med stroke rehabilitering samt har i sin forskarutbildning stor erfarenhet av att planera och leda forskningsprojekt.

#### **4. Curriculum Vitae för medsökande**

Lämna kortfattade uppgifter under nedanstående rubriker. **Maximalt utrymme en A4-sida per medsökande.** Vid flera medsökande, kopiera nedanstående och lägg till en sida. Text kan kopieras från andra dokument. Formatera till Arial 11 punkter, radavstånd 1,5. **Börja skriv på raden under rubriken.**

**Medsökande, namn:**

Susanne Guidetti

**a. Grundexamen, år, ämne**

Arbetsterapeutexamen, 1986, Stockholm

**b. Legitimation (eller motsvarande), år**

Leg. arbetsterapeut 1999

**c. Specialistkompetens, år, specialitet**

[Klicka här och fyll i ]

**d. Disputation, år, universitet, ämne**

Planerat datum 30 maj 2008

**e. Docentkompetens, år, universitet, ämne**

[Klicka här och fyll i ]

**f. Nuvarande anställning**

Arbetsterapikliniken vid Karolinska Universitetssjukhuset i Solna, Sektionen för neurologi. FoUU samordnare på kliniken. Susanne Guidetti är doktorand vid sektionen för arbetsterapi, KI.

PoUU-kansliet

*g.Handledarskap (såväl pågående som avslutade)*

Handledare av ett flertal C-och D-uppsatser inom arbetsterapi.

*f.Övrigt*

Susanne Guidetti har en stor klinisk erfarenhet men även tidigare forskningserfarenhet och är specialist inom ADL-bedömning och träning.

12/169a 7

## En studie om rehabilitering efter stroke: Utvärdering av ADL-träning

Tidigare studier har visat att personer som har insjuknat i stroke ofta upplever ett behov av uppföljande rehabilitering och att deras nära anhöriga ofta upplever att de behöver ge stöd i vardagens aktiviteter. För att kunna utveckla rehabiliteringen behövs mer kunskap om vilken effekt olika rehabiliteringsinsatser har på patienters och de närståendes vardagsliv. ADL-träning är en vanlig behandlingsmetod som innebär att patienten tränar upp sin förmåga att utföra aktiviteter i det dagliga livet såsom att klä på sig, duscha, laga eller värma mat etc. Syftet med träningen är att patienten ska bli självständig och oberoende av assistans, vilket förhoppningsvis kan minska närstående personers upplevelse av börda i vardagens aktiviteter. I denna studie jämförs effekten av sedvanlig ADL-träning och en ny ADL-träningsmetod.

Du som är tillfrågad och vill delta i studien, kommer att delta i en av de två ADL-träningsgrupperna. Projektansvarig forskare har lottat vilken typ av ADL-träning som ska erbjudas av de rehabiliteringsenheter och hemrehabiliteringsteam där studien genomförs, dvs den nya ADL-träningsmetoden eller den sedvanliga. Du kommer, på den klinik eller i det hemrehabiliteringsteam du befinner dig, få möjligheter att delta i antingen sedvanlig ADL-träning (dvs den ordinarie typen av ADL-träning som erbjuds på kliniken/i hemrehabiliteringsteamet) eller en ny typ av ADL-träning som är utvecklad för denna studie. För ADL-träningen ansvarar kliniken eller hemrehabiliteringsteamets arbetsterapeut. Du kommer att få träffa en arbetsterapeut som är forskningsassistent vid fyra tillfällen (innan träningen börjar och 3, 6 och 12 månader efter att träningen påbörjats) under året efter att du fick stroke för samtal och undersökning av ADL-förmåga.

Data som samlas in (genom patientjournaler, landstingets databas samt ovan beskrivna undersökningar) oidentifieras. Detta innebär att ditt namn inte kommer att finnas med på några dokument och att vi avstår från att redovisa personlig information som kan röja din identitet vid rapportering av resultatet. Alla dokument förvaras som journalhandlingar, dvs i låsta utrymmen. Ditt deltagande är helt frivilligt och du kan när som helst, utan närmare förklaring och utan att det påverkar din övriga behandling, avbryta ditt deltagande i studien.

Du är välkommen att kontakta oss om du önskar ytterligare information eller om det uppstår problem:

Projektansvarig: Lena von Koch, docent, Karolinska Institutet, Institutionen för neurobiologi, vårdvetenskap och samhälle, Sektionen för arbetsterapi. 08-524 83 555

Medansvariga forskare;

Stockholm: Susanne Guidetti, leg. arbetsterapeut, med dr, Arbetsterapikliniken, Karolinska Universitetssjukhuset. Tel: 0739-66 16 36

Uppsala: Gunilla Eriksson, leg. arbetsterapeut, med dr, VO Arbetsterapi, Akademiska sjukhuset. Tel: 0702-21 69 24

Gävle/Sandviken: Ulla Johansson, leg arbetsterapeut, med dr, Rehabiliteringsmedicinska kliniken, Sandvikens sjukhus. Tel: 070-25 83 393

W1 109a -1

## En studie om rehabilitering efter stroke: Erfarenheter av ADL-träning

Under din rehabilitering efter din stroke har du deltagit i ADL-träning och du har då tränat din förmåga att klara vardagliga aktiviteter som t ex att duscha, klä dig, laga mat eller handla.

Du har tidigare tackat ja till att delta i en studie som syftar till att jämföra effekten av sedvanlig ADL-träning och en ny ADL-träningsmetod. För att fördjupa kunskapen om olika rehabiliteringsinsatsers effekt på vardagslivet finns det ett behov av att fånga dina/era erfarenheter av att delta i denna ADL-träning. Därför undrar vi nu om du med din närstående skulle kunna delta i en ytterligare studie. Detta innebär att du och din närstående kommer att få träffa en arbetsterapeut (doktorand) för ett samtal vid två tillfällen. Frågorna kommer att handla om hur du upplevde träningen av olika vardagsaktiviteter tillsammans med din arbetsterapeut och vad detta har inneburit för dig och din närstående.

De data som samlas in i denna studie (dvs utskrifter av de inspelade intervjuerna samt data från patientjournaler och landstingets databas) avidentifieras. Detta innebär att ditt namn inte kommer att finnas med på några dokument och att vi avstår från att redovisa personlig information som kan röja din identitet vid rapportering av resultatet. Alla dokument förvaras som journalhandlingar, dvs i låsta utrymmen. Bandinspelningen av intervjuerna kommer att raderas när studien är klar. Ditt deltagande är helt frivilligt och du kan när som helst, utan närmare förklaring och utan att det påverkar din övriga behandling, avbryta ditt deltagande i studien.

Du är välkommen att kontakta oss om du önskar ytterligare information.

Projektansvarig: Lena von Koch, docent, Karolinska Institutet, Institutionen för neurobiologi, vårdvetenskap och samhälle, Sektionen för arbetsterapi. 08-524 83 555

Medansvariga forskare;

Stockholm: Susanne Guidetti, leg. arbetsterapeut, med dr, Arbetsterapikliniken, Karolinska Universitetssjukhuset. Tel: 0739-66 16 36

Uppsala: Gunilla Eriksson, leg. arbetsterapeut, med dr, VO Arbetsterapi, Akademiska sjukhuset. Tel: 0702-21 69 24

Gävle/Sandviken: Ulla Johansson, leg arbetsterapeut, med dr, Rehabiliteringsmedicinska kliniken, Sandvikens sjukhus. Tel: 070-25 83 393

B1.5

1  
2  
3  
5  
6

**MINIMENTAL STATUS**

**DATUM:**

**POÄNG:**

1. Nämn år, månad och dag, datum och årstid

5 4 3 2 1 0

2. Nämn land, län, stad, sjukhus, våningsplan

5 4 3 2 1 0

3. Repetera; Boll, flagga, träd (antal rätt vid första försöket, repetera max 3 ggr)

3 2 1 0

4. Serie 7:or (Subtrahera 7:or från 100 och nedåt till 65) el bokstavera KONST bakläng

K 0 N S T  
5 4 3 2 1 0  
65 72 79 86 93 100

5. Minns de tre orden vid fråga 3 (boll, flagga, träd)

3 2 1 0

6. Vad heter föremålen? (Visa penna och armbandsur)

2 1 0

7. Säg efter mig: "Taggtrådsstängsel"

1 0

8. Trestegskommando: "Tag emot papperet i din högra hand, vik det på mitten och lägg det sedan på bordet"

3 2 1 0

9. Blunda! (visa skrivet papper med texten BLUNDA, gör pat det =1 annars 0)

1 0

10. Skriv en mening, vilken som helst, fullständig med subjekt och predikat:

1 0

11. Spatial förmåga. (rita av denna figur, 1 p om korsningen mellan figurerna och alla hörnen korrekta, annars 0)

1 0

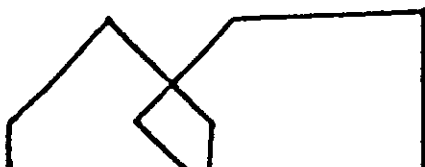

Datum: .....

Patientnummer.....

**KATZ EXTENDED ADL INDEX / BARTHEL INDEX**

|                                |                                                                                                                                                                    | BARTHEL | KATZ |
|--------------------------------|--------------------------------------------------------------------------------------------------------------------------------------------------------------------|---------|------|
| <b>MAT och DRYCK/FÖDOINTAG</b> |                                                                                                                                                                    |         |      |
| <b>BARTHEL</b>                 | Oberoende. Kan själv använda nödvändiga hjälpmedel.<br>Äter inom rimlig tid (10)                                                                                   | 10      |      |
|                                | Behöver hjälp t ex för att skära, men kan äta själv (5)                                                                                                            | 5       |      |
|                                | Kan ej äta själv (0)                                                                                                                                               | 0       |      |
| <b>KATZ 1</b>                  | Oberoende. Får själv in maten i munnen och sväljer.<br>Får hjälp att skära kött, öppna matförpackningar. (1)                                                       |         | 1    |
|                                | Beroende. Får hjälp att få in maten i munnen eller sondmatas, eller har näringsdropp. (0)                                                                          |         | 0    |
| <b>BADNING</b>                 |                                                                                                                                                                    |         |      |
| <b>BARTHEL</b>                 | Klarar sig utan hjälp. (5)                                                                                                                                         | 5       |      |
|                                | Beroende av hjälp eller övervakning (0)                                                                                                                            | 0       |      |
| <b>KATZ 2</b>                  | Oberoende. Får ingen hjälp eller övervakning.<br>Tar sig till handfatet själv, eller i och ur badkaret, ingen tillsyn i duschen.<br>Får tvätthjälp med ryggen. (1) |         | 1    |
|                                | Beroende. Får hjälp att ta sig till tvättplats eller vatten framburet. Hjälps i och ur badkar, tillsyn i dusch, hjälp med fötter eller underlivet. (0)             |         | 0    |
| <b>PERSONLIG TOALETT</b>       |                                                                                                                                                                    |         |      |
| <b>BARTHEL</b>                 | Klarar själv att tvätta ansikte, kamma hår, borsta tänderna, rakning (el. rakapparat). (5)                                                                         | 5       |      |
|                                | Behöver hjälp med personlig toalett (0)                                                                                                                            | 0       |      |



Datum: .....

Patientnummer:.....

|                                       |                                                                                                                                                                                                   | BARTHEL | KATZ |
|---------------------------------------|---------------------------------------------------------------------------------------------------------------------------------------------------------------------------------------------------|---------|------|
| <b>PÅKLÄDNING; PÅ- OCH AVKLÄDNING</b> |                                                                                                                                                                                                   |         |      |
| <b>BARTHEL</b>                        | Oberoende. Kan knyta skor. Klarar knappanordningar och sätta på bandage. (10)                                                                                                                     | 10      |      |
|                                       | Behöver hjälp men kan åtminstone göra hälften inom rimlig tid. Hälften =hjälp med knappar, dragkedja men kan ta på något plagg själv (5)                                                          | 5       |      |
|                                       | Beroende av hjälp vid på- och avklädning (0)                                                                                                                                                      | 0       |      |
| <b>KATZ 3</b>                         | Oberoende. Får ingen hjälp eller övervakning. Hämtar kläder, klar på och av sig, även korsett, ytterkläder, skor, strumpor. Får hjälp att knyta skor. (1)                                         |         | 1    |
|                                       | Beroende. Får hjälp att hämta, eller med på- och avklädning, eller förblir ofullständigt klädd. (0)                                                                                               |         | 0    |
| <b>TARMKONTROLL</b>                   |                                                                                                                                                                                                   |         |      |
| <b>BARTHEL</b>                        | Oberoende. Kan själv ge lavemang eller stolpiller vid behov. (10)                                                                                                                                 | 10      |      |
|                                       | Nedsatt kontroll över tarmen (1 gång/v) och behöver hjälp med lavemang eller stolpiller. (5)                                                                                                      | 5       |      |
|                                       | Inkontinent. (0)                                                                                                                                                                                  | 0       |      |
| <b>BLÅSKONTROLL/KONTINENS</b>         |                                                                                                                                                                                                   |         |      |
| <b>BARTHEL</b>                        | Kontinent. Kan själv använda urinuppsamlade förband. (10)                                                                                                                                         | 10      |      |
|                                       | Nedsatt kontroll över blåsan (max 1 gång/dygn) eller behöver hjälp med urinuppsamlade förband (5)                                                                                                 | 5       |      |
|                                       | Inkontinent eller kateter som sköts med hjälp av annan person (0)                                                                                                                                 | 0       |      |
| <b>KATZ 4</b>                         | Oberoende. Kontinent, Sköter själv ev. Medicin, lavemang, colostomi, KAD i hemmet. (1)                                                                                                            |         | 1    |
|                                       | Beroende. Hinner inte till toaletten. Inkontinent 1 gång under obs-tiden. Inkontinent ständigt. Får ständigt tillsyn, eller hjälp av annan. KAD som blåstränas. Colostomi som sköts av annan. (0) |         | 0    |

Datum: .....

Patientnummer:.....

|                               |                                                                                                                                                                                                                                                                            | BARTHEL | KATZ |
|-------------------------------|----------------------------------------------------------------------------------------------------------------------------------------------------------------------------------------------------------------------------------------------------------------------------|---------|------|
| <b>TOALETTBESÖK</b>           |                                                                                                                                                                                                                                                                            |         |      |
| <b>BARTHEL</b>                | Oberoende vid toalettbesök och vid användandet av bäcken. Klarar kläder, att torka sig, spola eller rengöra bäcken. (10)                                                                                                                                                   | 10      |      |
|                               | Förflyttningshjälp, hjälp med kläder och toapapper. (5)                                                                                                                                                                                                                    | 5       |      |
|                               | Helt hjälpberoende (0)                                                                                                                                                                                                                                                     | 0       |      |
| <b>KATZ 5</b>                 | Oberoende. Får ingen hjälp eller övervakning. Kan använda käpp, gästol, rullstol. Kan använda nattkärl och då tömma detta själv. (1)                                                                                                                                       |         | 1    |
|                               | Beroende. Får hjälp att ta sig till toaletten, eller med något av ovanstående. Får hjälp att ta sig till toaletten, eller med något av ovanstående. Får hjälp eller övervakning: kan inte ta sig till toaletten. Använder bäcken, blöja eller toalettstol även dagtid. (0) |         | 0    |
| <b>STOL- SÅNGFÖRFLYTTNING</b> |                                                                                                                                                                                                                                                                            |         |      |
| <b>BARTHEL</b>                | Oberoende. Inkl. att låsa rullstol och lyfta fotstöd. (15)                                                                                                                                                                                                                 | 15      |      |
|                               | Lite assistans och tillsyn (10)                                                                                                                                                                                                                                            | 10      |      |
|                               | Kan sitta men behöver hjälp vid förflyttning (5)                                                                                                                                                                                                                           | 5       |      |
|                               | Kan ej sitta, behöver hjälp av 2 personer eller lift vid förflyttning (0)                                                                                                                                                                                                  | 0       |      |
| <b>FÖRFLYTTNING</b>           |                                                                                                                                                                                                                                                                            |         |      |
| <b>KATZ 6</b>                 | Oberoende. Får ingen hjälp eller övervakning. Kan använda ett stöd, t ex käpp, sängstolpe. (1)                                                                                                                                                                             |         | 1    |
|                               | Beroende. Får hjälp av annan person. Sängbunden. Kan eller får ej lämna sängen, eller behöver lyftas (två personer). (0)                                                                                                                                                   |         | 0    |
| <b>BARTHEL</b>                | Klarar att gå 50 meter, får använda käpp eller bock, dock ej rollator. (15)                                                                                                                                                                                                | 15      |      |
|                               | Klarar att gå 50 meter med hjälpmedel och levande stöd eller tillsyn. (10)                                                                                                                                                                                                 | 10      |      |
|                               | Oberoende med rullstol, kan själv köra 50 meter, endast vid oförmåga att gå. (5)                                                                                                                                                                                           | 5       |      |
|                               | Helt hjälpberoende (0)                                                                                                                                                                                                                                                     | 0       |      |

## STÄDNING

*Rengör bostaden, dammsuger, torkar golv. Noggrannheten i städningen bedöms ej.*

KATZ

**Oberoende.** Städar enligt ovan vid behov. Får hjälp att bära ut mattorna. (1)

1

**Beroende.** Städar inte alls eller får hjälp med något av ovanstående. (0)

0

## MATUPPKÖP

*Tar sig till affären, klarar trappor eller andra hinder, plockar varor, betalar, bär hem*

**Oberoende.** Handlar mat enligt ovan. (1)

1

**Beroende.** Handlar mat tillsammans med ledsagare. Handlar inte mat eller får hjälp med något av ovanstående. (0)

0

## TRANSPORT

*Tar sig till hållplatsen för allmänna kommunikationer, stiger på och färdas med t ex buss, spårvagn eller lokaltåg.*

**Oberoende.** Använder allmänna kommunikationsmedel vid behov. (1)

1

**Beroende.** Måsta ha ledsagare i någon del av aktiviteten. Tar sig inte till hållplatsen eller måste ha ledsagare hela vägen. (0)

0

## MATLAGNING

*Tar sig till köket, tillreder middag, sköter spisen*

**Oberoende.** Lagar mat enligt ovan vid behov. (1)

1

**Beroende.** Lagar inte middag eller värmer enbart färdiglagad mat. Lagar inga mål. (0)

0

Kommentar:.....

.....

.....

.....

Bilaga 5

1 Datum \_\_\_/\_\_\_/\_\_\_

2 12 månader

3 Pat nr \_\_\_\_\_

4 **Datainsamlare:**.....5  
6 **TID ATT GÅ 10 METER INOMHUS**7  
8 **Kan ej gå (0) Kan gå med hjälpmedel och tillsyn (1)**9  
10 **med hjälpmedel (2) utan hjälpmedel (3) \_\_\_\_\_**11  
12 *Be patienten gå så fort som möjligt (utan att äventyra säkerheten)*13  
14 **Tid att gå 10 m (sek) \_\_\_\_\_**15  
16 **Gånghjälpmedel.....**17  
18 **NINE- HOLE PEG TEST**19  
20 *Test: Be patienten placera de 9 pinnarna i brädans hål, en pinne i taget och därefter ta ur dem, en i taget och lägga tillbaka dem i lådan så snabbt som möjligt. Placera lådan framför patienten så att lådan står närmast den hand som testas. Låt patienten få öva sig en gång innan testet utförs. Börja med den icke-afficerade handen. Tid tas från det patienten tar den första pinnen till den sista pinnen är tillbakalagd i lådan.*21  
22 **Höger sida, sek \_\_\_\_\_**23  
24 **Höger sida, antal peg/min \_\_\_\_\_**25  
26 **Vänster sida, sek \_\_\_\_\_**27  
28 **Vänster sida, antal peg/min \_\_\_\_\_**29  
30 *Antal peg/min anges när patienten har mycket nedsatt finmotorik i handen. Saknas finmotorik handen anges 0 peg/min. Kan patienten, men mycket långsamt, ta tid det tar för patienten att plocka upp och placera och ta ur en pinne, tillåt max 2 minuter. Ange sedan antal peg/min.*

2005-08-03

## AMPS BEDÖMNINGSFORMULÄR

## Klientdata

Klient: \_\_\_\_\_

Bedömare: \_\_\_\_\_

Klient id: \_\_\_\_\_ Alder: \_\_\_\_\_

Kön: man \_\_\_\_\_ kvinna \_\_\_\_\_

Huvudsaklig diagnos: \_\_\_\_\_

Sekundär diagnos: \_\_\_\_\_

Bedömningsdatum: \_\_\_\_\_

Obs. av uppgift nr: 1 \_\_\_\_\_ 2 \_\_\_\_\_ 3 \_\_\_\_\_ 4 \_\_\_\_\_

Uppgift nr: \_\_\_\_\_ Uppgift: \_\_\_\_\_

Kvaliteten på klientens utförande i den här uppgiften:

|                      | Inga problem |   |   | stora problem |   |   |
|----------------------|--------------|---|---|---------------|---|---|
| Ökad ansträngning    | 1            | 2 | 3 | 4             | 5 | 6 |
| Minskad effektivitet | 1            | 2 | 3 | 4             | 5 | 6 |
| Säkerhetsrisk        | 1            | 2 | 3 | 4             | 5 | 6 |
| Behov av assistans   | 1            | 2 | 3 | 4             | 5 | 6 |

Klientens generella förmåga att fungera självständigt ute i

miljön (utifrån allt du vet om klienten)

Klienten kan/skulle kunna fungera självständigt

Klienten behöver/skulle behöva minimal

assistans/handledning

Klienten behöver/skulle behöva moderat till maximal

assistans

## MOMENTENS POÄNG

Kompetent=4 Tveksamt=3 Begränsat=2 Bristande=1

## KROPPSPACERING

Söker/lokaliserar 4 3 2 1

Samlar ihop 4 3 2 1

Organiserar 4 3 2 1

Återställer 4 3 2 1

Navigerar 4 3 2 1

## SKAFFA och HÅLLA FÖREMÅL

Söker/lokaliserar 4 3 2 1

Samlar ihop 4 3 2 1

Organiserar 4 3 2 1

Återställer 4 3 2 1

Navigerar 4 3 2 1

## FLYTTA SIG SJÄLV och FÖREMÅL

Flyttar 4 3 2 1

Lyfter 4 3 2 1

Går 4 3 2 1

Transporterar 4 3 2 1

Kalibrerar 4 3 2 1

Har flyt 4 3 2 1

## UPPRÄTTHÅLLA GÖRANDET

Orkar 4 3 2 1

Håller tempo 4 3 2 1

Fokuserar 4 3 2 1

Arbetar målinriktat 4 3 2 1

## ANVÄNDA KUNSKAP

Väljer 4 3 2 1

Använder 4 3 2 1

Hanterar 4 3 2 1

Frågar 4 3 2 1

## ORGANISERA TID

Inleder 4 3 2 1

Fortsätter 4 3 2 1

Gör i logisk ordning 4 3 2 1

Avslutar 4 3 2 1

## ORGANISERA RUM och FÖREMÅL

Söker/lokaliserar 4 3 2 1

Samlar ihop 4 3 2 1

Organiserar 4 3 2 1

Återställer 4 3 2 1

Navigerar 4 3 2 1

## ANPASSA GÖRANDET

Lägger märke till/ Agerar 4 3 2 1

Anpassar miljö 4 3 2 1

Anpassar beteende 4 3 2 1

Drar nytta av 4 3 2 1

Bil.5

Lena von Koch , adaptationsprocessen, strokeprojekt, aug.2000

## Frenchay Activitiy Index

### Referenser:

Wade DT, Legh-Smith J, Langton Hewer R. Social activities after stroke: measurement and natural history using the Frenchay Activities Index. *Int Rehabil Med* 1985;7:176-181.

Wade DT *Measurement in Neurological Rehabilitation* Oxford University Press;1992.

**Namn:** \_\_\_\_\_

**Datum:** \_\_\_\_\_

### Under de senaste 3 månaderna:

Sätt ett kryss efter ett alternativ (per fråga)

#### 1. Laga mat, huvudmåltid.

(utför en väsentlig del av planering, förberedelser, tillagning. Ej enbart värma mat, koka kaffe eller ordna mellanmål)

0=aldrig ( )

1= mindre än 1gång/vecka ( )

2=1-2ggr/vecka ( )

3=de flesta dagar ( )

#### 2. Diska

(diska, torka, ställa undan inte bara skölja av något enstaka föremål)

0=aldrig ( )

1= mindre än 1gång/vecka ( )

2=1-2ggr/vecka ( )

3=de flesta dagar ( )

Lena von Koch , adaptationsprocessen, strokeprojekt, aug.2000

### 3. Tvätta kläder

(planera tvättning och torkning av kläder antingen för hand eller i maskin)

0=aldrig ( )

1=1-2ggr under 3 månader ( )

2= mellan 1 i månaden och  
1gång i veckan (3-12 ggr) under 3 månader ( )

3=minst 1 gång /vecka ( )

### 4. Lätt hushållsarbete

(damma, putsa och ställa i ordning lätta föremål)

0=aldrig ( )

1=1-2ggr under 3 månader ( )

2= mellan 1 i månaden och 1gång i  
veckan (3-12 ggr) under 3 månader ( )

3=minst 1 gång /vecka ( )

### 5. Tungt hushållsarbete

(allt hushållsarbete inklusive bädda säng, rengöring av golv, flytta möbler  
etc.)

0=aldrig ( )

1=1-2ggr under 3 månader ( )

2= mellan 1 i månaden och  
1gång i veckan (3-12 ggr) under 3 månader ( )

3=minst 1 gång /vecka ( )

Lena von Koch , adaptationsprocessen, strokeprojekt, aug.2000

## 6. Handla

(utföra en väsentlig del av planering och inköp, liten eller stor mängd varor, inte enbart skjuta kundvagnen).

0=aldrig ( )

1=1-2ggr under 3 månader ( )

2= mellan 1 i månaden och  
1 gång i veckan (3-12 ggr) under 3 månader ( )

3=minst 1 gång /vecka ( )

## 7. Sociala aktiviteter utanför hemmet

(gå på bio, teater, restaurang förenings-, fritids- och kyrkliga aktiviteter, äta och dricka med vänner etc. aktivt deltagande)

0=aldrig ( )

1=1-2ggr under 3 månader ( )

2= mellan 1 i månaden och 1 gång i  
veckan (3-12 ggr) under 3 månader ( )

3=minst 1 gång /vecka ( )

## 8. Promenera utomhus mer än 15 min

(oavbruten promenad under minst 15 min eller 1.5 km. Korta andhämtningspauser är tillåtna. Kan innebära att gå till mål ex. affären)

0=aldrig ( )

1=1-2ggr under 3 månader ( )

2= mellan 1 i månaden  
och 1 gång i veckan (3-12 ggr) under 3 månader ( )

3=minst 1 gång /vecka ( )



Lena von Koch , adaptationsprocessen, strokeprojekt, aug.2000

### 9. Utöva hobbyverksamhet

(måste deltaga aktivt sticka, odla växter, måla, idrotta - inte bara se på sport på TV)

0=aldrig ( )

1=1-2ggr under 3 månader ( )

2= mellan 1 i månaden och 1gång i veckan (3-12 ggr) under 3 månader ( )

3= minst 1 gång /vecka ( )

### 10. Köra bil / använda allmänna kommunikationer

(ej färdtjänst)

0=aldrig ( )

1=1-2ggr under 3 månader ( )

2= mellan 1 i månaden och 1gång i veckan (3-12 ggr) under 3 månader ( )

3= minst 1 gång /vecka under de senaste 6 månaderna ( )

### 11. Utflykter / bilturer (nöjesresor)

(buss-, tåg-, eller bilturer - en del planering och beslutsfattande skall ingå inte resor organiserade av institution såvida inte patienten själv har valt att deltaga)

0=aldrig ( )

1=1-2 gånger under 6 månader ( )

2=mellan 1 gång varannan månad och 2 gånger i månaden under 6 månader (3-12 gånger) ( )

3= varje vecka under 6 månader ( )

Lena von Koch , adaptationsprocessen, strokeprojekt, aug.2000

## 12. Trädgårdsskötsel

- 0=aldrig ( )  
1= lätt (tillfällig rensning av ogräs, gräsklippning) ( )  
2=måttligt (regelbunden resning av ogräs, gräsklippning) ( )  
3= tungt ( allt nödvändigt arbete inklusive grävning) ( )

## 13. Hushålls- / bilskötsel

- 0=aldrig ( )  
1=lätt (reparera mindre skador) ( )  
2= måttligt (lite målning, pyntning, rutinmässig bilskötsel) ( )  
3=tungt (det mesta som är nödvändigt för hushålls- / bilskötsel och reparationer) ( )

## 14. Läsa böcker

( ej tidningar, tidskrifter eller dagstidningar)

- 0= ingen ( )  
1=1 under 6 månader ( )  
2= mindre än 1 var fjortonde dag, ( )  
3=mer än 1 var fjortonde dag ( )

## 15. Förvärvsarbete

- 0= inget ( )  
1= upp till 10 timmar per vecka ( )  
2= 10-30 timmar per vecka ( )  
3= mer än 30 timmar per vecka ( )

*Bilagor*

## Dina vardagsaktiviteter (Occupational Gaps Questionnaire; OGQ)

I detta instrument ombeds Du besvara om Du utför och vill utföra 28 olika aktiviteter i ditt boende, på din fritid, i ditt arbete och i ditt sociala liv. Två frågor ställs vid varje aktivitet. Dessa två frågor berör om Du utför och om Du vill utföra aktiviteten (avser den vardagssituation Du lever i nu).

Var vänlig och kryssa i det svarsalternativ som stämmer bäst för Dig ( "ja" eller "nej") vid båda frågorna vid varje aktivitet i frågeformuläret.

### Exemplen i frågeformuläret

Vid de flesta av aktiviteterna finns några exempel på typer av aktiviteter som avses. Dessa ska bara ses som exempel.

- Det finns t ex många fler idrotts- och motionsaktiviteter än de som angivits i fråga 9. Du kan utföra andra idrottsaktiviteter och ändå svara "ja" på frågan om Du utför aktiviteten.
- Det kan också vara så att du inte gör något som du vill göra t ex att du inte längre kan baka som du tyckt om att göra tidigare. Du ska då under fråga 2 svara "nej" på frågan "Utför du aktiviteten?" och "ja" på frågan "Vill du utföra aktiviteten?" fastän du fortfarande både lagar mat, diskar, dukar som är exempel under fråga 2.

|                                                                                                                                                      |                                                      |                                                            |                                                              |
|------------------------------------------------------------------------------------------------------------------------------------------------------|------------------------------------------------------|------------------------------------------------------------|--------------------------------------------------------------|
| 1. Inköp<br>(ex göra småinköp,<br>veckohandla)                                                                                                       | Utför du aktiviteten?<br>Vill Du utföra aktiviteten? | ja <input type="checkbox"/><br>ja <input type="checkbox"/> | nej <input type="checkbox"/><br>nej <input type="checkbox"/> |
| 2. Matlagning<br>ex laga mat, baka<br>kåsar, dukar)                                                                                                  | Utför du aktiviteten?<br>Vill Du utföra aktiviteten? | ja <input type="checkbox"/><br>ja <input type="checkbox"/> | nej <input type="checkbox"/><br>nej <input type="checkbox"/> |
| 3. Tvätt och klädvård<br>(ex tvätta, stryka, laga)                                                                                                   | Utför du aktiviteten?<br>Vill Du utföra aktiviteten? | ja <input type="checkbox"/><br>ja <input type="checkbox"/> | nej <input type="checkbox"/><br>nej <input type="checkbox"/> |
| 4. Städning (ex damma<br>dammsuga)                                                                                                                   | Utför du aktiviteten?<br>Vill Du utföra aktiviteten? | ja <input type="checkbox"/><br>ja <input type="checkbox"/> | nej <input type="checkbox"/><br>nej <input type="checkbox"/> |
| 5. Sköta enklare<br>underhåll av bostad,<br>trädgård, bil<br>(ex småreparationer, sköta<br>om blommor, tvätta bil, klippa<br>gräsmatta, rensa ogräs) | Utför du aktiviteten?<br>Vill Du utföra aktiviteten? | ja <input type="checkbox"/><br>ja <input type="checkbox"/> | nej <input type="checkbox"/><br>nej <input type="checkbox"/> |
| 6. Sköta mer<br>omfattande underhåll<br>av bostad, trädgård,<br>bil<br>(ex reparera bil, anlägga<br>odling, bygga om/renovera bostaden)              | Utför du aktiviteten?<br>Vill Du utföra aktiviteten? | ja <input type="checkbox"/><br>ja <input type="checkbox"/> | nej <input type="checkbox"/><br>nej <input type="checkbox"/> |
| 7. Sköta hemmets<br>ekonomi                                                                                                                          | Utför du aktiviteten?<br>Vill Du utföra aktiviteten? | ja <input type="checkbox"/><br>ja <input type="checkbox"/> | nej <input type="checkbox"/><br>nej <input type="checkbox"/> |

- 1  
2 **8. Transporter** Utför du aktiviteten? ja  nej   
3 (ex åka bil/buss, cykla Vill Du utföra aktiviteten? ja  nej   
4 köra bil)  
5  
6  
7 **9. Idrott/motion** Utför du aktiviteten? ja  nej   
8 (ex motionsgympa, simma Vill Du utföra aktiviteten? ja  nej   
9 jogga, spela fotboll, titta på  
10 idrottsevenemang)  
11  
12  
13 **10. Friluftsliv** Utför du aktiviteten? ja  nej   
14 (ex promenera, plocka bär Vill Du utföra aktiviteten? ja  nej   
15 och svamp, jaga, fiska,  
16 campa)  
17  
18  
19 **11. Hobbyaktiviteter** Utför du aktiviteten? ja  nej   
20 (ex handarbete, hantverk, Vill Du utföra aktiviteten? ja  nej   
21 snickra, spela instrument,  
22 sjunga i kör, fotografera,  
23 ta hand om husdjur)  
24  
25  
26 **12. Kulturella** Utför du aktiviteten? ja  nej   
27 **aktiviteter** Vill Du utföra aktiviteten? ja  nej   
28 (ex gå på bio, konserter,  
29 teater, utställningar, bibliotek)  
30  
31 **13. TV/video/radio/** Utför du aktiviteten? ja  nej   
32 **stereo** (ex lyssna på musik, Vill Du utföra aktiviteten? ja  nej   
33 titta på film, TV-serier,  
34 nyheter)  
35  
36  
37 **14. Läsa** (ex dagstidning) Utför du aktiviteten? ja  nej   
38 Vill Du utföra aktiviteten? ja  nej   
39  
40  
41 **15. Läsa** (ex tidskrifter, Utför du aktiviteten? ja  nej   
42 **litteratur**) Vill Du utföra aktiviteten? ja  nej   
43  
44  
45 **16. Skriva** (ex skriva brev Utför du aktiviteten? ja  nej   
46 **dikta, författa**) Vill Du utföra aktiviteten? ja  nej   
47  
48  
49 **17. Spel** (ex tips, Utför du aktiviteten? ja  nej   
50 **sällskapsspel, lägga patiens,** Vill Du utföra aktiviteten? ja  nej   
51 **lösa korsord**)  
52  
53  
54 **18. Dator** (ex spela, Utför du aktiviteten? ja  nej   
55 **surfa på internet**) Vill Du utföra aktiviteten? ja  nej   
56  
57  
58 **19. Umgås med** Utför du aktiviteten? ja  nej   
59 **partner och/eller barn** Vill Du utföra aktiviteten? ja  nej   
60

- 1  
2  
3  
4 **20. Umgås med släkt, vänner, grannar** Utför du aktiviteten? ja  nej   
5 Vill Du utföra aktiviteten? ja  nej   
6 (ex besöka, bjuda hem,  
7 tala i telefon)  
8  
9
- 10 **21. Delta i förenings-** Utför du aktiviteten? ja  nej   
11 **verksamhet** Vill Du utföra aktiviteten? ja  nej   
12  
13  
14
- 15 **22. Delta i religiös** Utför du aktiviteten? ja  nej   
16 **verksamhet** Vill Du utföra aktiviteten? ja  nej   
17  
18  
19
- 20 **23. Besöka restaurant,** Utför du aktiviteten? ja  nej   
21 **café, pub, danslokal** Vill Du utföra aktiviteten? ja  nej   
22  
23
- 24 **24. Resa** Utför du aktiviteten? ja  nej   
25 (ex för nöje, charter) Vill Du utföra aktiviteten? ja  nej   
26  
27
- 28 **25. Yrkesarbete** Utför du aktiviteten? ja  nej   
29 (hel- eller deltid) Vill Du utföra aktiviteten? ja  nej   
30  
31
- 32 **26. Studier** Utför du aktiviteten? ja  nej   
33 (hel- eller deltid) Vill Du utföra aktiviteten? ja  nej   
34  
35
- 36 **27. Sköta och upp-** Utför du aktiviteten? ja  nej   
37 **fostra barn** Vill Du utföra aktiviteten? ja  nej   
38  
39
- 40 **28. Frivilligarbete** Utför du aktiviteten? ja  nej   
41 (ex leder gymnastikgrupper, Vill Du utföra aktiviteten? ja  nej   
42 studiecirkel, ungdomsverk-  
43 samhet, är politiskt aktiv)  
44  
45

46 **29. Beskriv gärna med egna ord hur du upplever dina vardagsaktiviteter och eventuella**  
47 **"gap" mellan vad du vill göra och gör.**  
48  
49

50 .....  
51 .....  
52 .....  
53 .....  
54 .....  
55 .....  
56 .....  
57 .....  
58 .....

59  
60 **Tack för Din medverkan!**

D1149a 5

## Inverkan på delaktighet och autonomi (IPA)

### Inledning

I detta frågeformulär ställs ett antal frågor om dagliga aktiviteter. Syftet med detta frågeformulär är att få ditt perspektiv på vilket sätt ditt hälsotillstånd eller *din/dina begränsning(ars)* inverkan på dina möjligheter att leva ditt som du vill. .

### Allmänna anmärkningar

När du besvarar frågorna, tänk på att det uteslutande handlar om *din* åsikt och *dina* erfarenheter. Inget svar är rätt eller fel. Det handlar om att ge det svar som du anser bäst stämmer på *din* situation.

Du kan besvara frågorna genom att sätta ett kryss vid det svar som du väljer. T.ex. om du kan förflytta dig i din egen bostad *vart/var* du vill, skulle du besvara den första frågan så här:

Att förflytta mig i min egen bostad *vart/var* jag vill går:

- X mycket bra
- O bra
- O ganska bra
- O ganska dåligt
- O dåligt

Vid varje fråga kryssar du endast för ett svar i cirkeln. Det är mycket viktigt att du besvarar alla frågor. Även om du tycker att en fråga är oviktig eller om du kanske inte har någon klar åsikt, ber vi dig ändå att kryssa för det svar som bäst passar din situation. Om du tvekar om svaret på en fråga, välj då det svar som ligger närmast din åsikt.

Efter varje fråga kan du ange hur stort problemet är för dig. Om du vill kan du kommentera ditt svar på varje fråga.

Det tar ungefär 20 minuter att fylla i detta frågeformulär.

**RÖRLIGHET**

Först vill vi ställa ett antal frågor om rörlighet, dvs. möjligheten att förflytta dig dit du vill och vara där du vill. I dessa frågor handlar det framför allt om huruvida du själv kan bestämma vart du förflyttar dig och när du gör det.

1 a) Att förflytta mig i min egen bostad *vart/var* jag vill går:

- mycket bra
- bra
- ganska bra
- ganska dåligt
- dåligt

1 b) Att förflytta mig i min egen bostad *när* jag vill går:

- mycket bra
- bra
- ganska bra
- ganska dåligt
- dåligt

1 c) Att besöka grannar, vänner och bekanta *när* jag vill går:

- mycket bra
- bra
- ganska bra
- ganska dåligt
- dåligt

1 d) Att göra utflykter eller en (semester)resa *så som* jag vill, går:

- mycket bra
- bra
- ganska bra
- ganska dåligt
- dåligt

**1 e) Problemupplevelse**

I vilken utsträckning tycker du att ditt hälsotillstånd eller din(a) begränsning(ar) är ett problem för din rörlighet inomhus och utomhus?

- inget problem
- i viss mån ett problem
- ett stort problem

(Eventuell) kommentar till svaren på frågorna 1a-1e:

**PERSONLIGA BESTYR**

Här följer nu några frågor om de personliga bestyren. I dessa frågor handlar det om i vilken mån du själv kan bestämma när du själv sköter dina bestyr eller får hjälp, och hur detta sker, även om du får hjälp.

2a) Att tvätta sig, klä på sig och sköta personliga bestyr *på det sätt* som jag vill går:

- mycket bra
- bra
- ganska bra
- ganska dåligt
- dåligt

2b) Att tvätta sig, klä sig eller sköta personliga bestyr *när* jag vill går:

- mycket bra
- bra
- ganska bra
- ganska dåligt
- dåligt

2c) Att lägga sig och att stiga upp *när* jag vill går:

- mycket bra
- bra
- ganska bra
- ganska dåligt
- dåligt

2d) Att gå på toaletten *när* jag vill det och tycker att det är nödvändigt går:

- mycket bra
- bra
- ganska bra
- ganska dåligt
- dåligt

2e) Att bestämma *när* jag vill äta och dricka går:

- mycket bra
- bra
- ganska bra
- ganska dåligt
- dåligt



**2f) Problemupplevelse**

I vilken utsträckning tycker du att ditt hälsotillstånd eller din(a) begränsning(ar) är ett problem för dina personliga bestyr?

- Inget problem
- I viss mån ett problem
- Ett stort problem

(Eventuell) kommentar till svaren på frågorna 2a- 2f:

**AKTIVITETER HEMMA OCH ROLL I FAMILJEN**

I varje familj (eller andra former av boende) har var och en vissa uppgifter och ansvarsområden. Det är vad som avses med roll i familjen. Följande frågor handlar om rollen i familjen och inverkan av ditt hälsotillstånd eller din(a) begränsning(ar) på hur du genomför den. Det handlar åter om i vilken utsträckning du kan bestämma när och hur något sker även om du inte gör det själv, därför står ordet "låta" i vissa frågor inom parentes.

3a) Mitt bidrag till hushållsuppgifterna *så som jag vill* är

- Mycket bra
- Bra
- Ganska bra
- Ganska dåligt
- Dåligt

3b) Att (låta) utföra lätt hushållsarbete (t.ex. laga mat, kaffe, te) *så som jag vill* går:

- Mycket bra
- Bra
- Ganska bra
- Ganska dåligt
- Dåligt

3c) Att (låta) utföra tyngre hushållsarbete (t.ex. städning) *så som jag vill* går:

- Mycket bra
- Bra
- Ganska bra
- Ganska dåligt
- Dåligt

3d) Att (låta) utföra hushållsuppgifter *när jag vill* går:

- Mycket bra
- Bra
- Ganska bra
- Ganska dåligt
- Dåligt

1  
2  
3  
4  
5 **3e) Att (låta) utföra småarbeten och underhåll på hus och i trädgården så som jag vill går:**

- 6  
7  mycket bra  
8  bra  
9  ganska bra  
10  ganska dåligt  
11  dåligt  
12

13  
14 **3f) Möjligheten att hemma spela den roll som tillkommer mig är:**

- 15  
16  mycket bra  
17  bra  
18  ganska bra  
19  ganska dåligt  
20  dåligt  
21

22 **3g) Problemupplevelse**

23 **I vilken utsträckning tycker du att ditt hälsotillstånd eller din(a) begränsning(ar) är ett problem**  
24 **för din roll i familjen eller i hushållet?**

- 25  
26  inget problem  
27  i viss mån ett problem  
28  ett stort problem  
29

30  
31 **(Eventuell) kommentar till svaren på frågorna 3a- 3g:**  
32  
33

34  
35 **EKONOMISK SITUATION**

36 **I denna fråga handlar det om i vilken utsträckning ditt hälsotillstånd eller din(a)**  
37 **begränsning(ar) påverkar användningen av din inkomst.**

38  
39  
40 **4a) Möjligheten att använda pengarna så som jag vill är:**

- 41  
42  mycket bra  
43  bra  
44  ganska bra  
45  ganska dålig  
46  dålig  
47

48 **4b) Problemupplevelse**

49 **I vilken utsträckning tycker du att ditt hälsotillstånd eller din(a) begränsning(ar) är ett problem**  
50 **för din ekonomi?**

- 51  
52  inget problem  
53  i viss mån ett problem  
54  ett stort problem  
55

56  
57 **(Eventuell) kommentar till svaren på frågorna 4a- 4b:**  
58  
59  
60

**ANVÄNDNING AV TIDEN OCH AVKOPPLING**

Om du själv kan bestämma vad du vill göra på din (fri)tid, *när* du vill göra det eller *hur länge* är vad denna fråga handlar om.

5a) Möjligheten att disponera min (fri)tid *så som jag vill* är:

- mycket bra
- bra
- ganska bra
- ganska dålig
- dålig

5b) **Problemupplevelse**

I vilken utsträckning tycker du att ditt hälsotillstånd eller din(a) begränsning(ar) är ett problem för hur du använder din tid och din fritid?

- inget problem
- i viss mån ett problem
- ett stort problem

(Eventuell) kommentar till svaren på frågorna 5a- 5b:

**SOCIALA KONTAKTER**

Följande frågor handlar om dina sociala kontakter.

Det kan vara så att dina sociala kontakter är annorlunda och förekommer mindre ofta på grund av ditt hälsotillstånd eller din(a) begränsning(ar). I frågorna 6c och 6e talas om "respekt".

Med respekt menas den utsträckning i vilken du behandlas korrekt och hövligt, som du under normala omständigheter har rätt att vänta dig.

6a) Möjligheten till ett *jämställt* samtal med mina närmaste är:

- mycket bra
- bra
- ganska bra
- ganska dålig
- dålig

6b) Umgänget med mina närmaste är:

- mycket bra
- bra
- ganska bra
- ganska dåligt
- dåligt

1  
2  
3  
4  
5 **6c) Den respekt som jag får av mina närmaste är:**  
6

- 7  mycket bra  
8  bra  
9  ganska bra  
10  ganska dålig  
11  dålig  
12  
13

14 **6d) Umgänget med människor som jag känner mindre väl är:**  
15

- 16  mycket bra  
17  bra  
18  ganska bra  
19  ganska dåligt  
20  dåligt  
21  
22

23 **6e) Den respekt som jag får av människor som jag känner mindre väl är:**  
24

- 25  mycket bra  
26  bra  
27  ganska bra  
28  ganska dålig  
29  dålig  
30

31 **På grund av ditt hälsotillstånd eller din(a) begränsning(ar) kan fysisk intimitet, eller inledning  
32 av intimitet med en annan vara förändrad.**  
33

34 **6f) Möjligheten till intimitet så som jag vill är:**  
35

- 36  mycket bra  
37  bra  
38  ganska bra  
39  ganska dålig  
40  dålig  
41  
42

43 **Det kan vara så att omfattningen med vilken du träffar andra människor förändrats på grund  
44 av ditt hälsotillstånd eller din(a) begränsning(ar).**  
45

46 **6g) Den omfattning med vilken jag träffar andra människor är:**  
47

- 48  mycket bra  
49  bra  
50  ganska bra  
51  ganska dålig  
52  dålig  
53  
54  
55  
56  
57  
58  
59  
60

**6h) Problemupplevelse**

I vilken utsträckning tycker du att ditt hälsotillstånd eller din(a) begränsning(ar) är ett problem för dina sociala kontakter?

- Inget problem
- I viss mån ett problem
- Ett stort problem

(Eventuell) kommentar till svaren på frågorna 6a-6h:

**HJÄLPA OCH STÖDJA ANDRA**

De kommande frågorna handlar om dina möjligheter till att hjälpa och stödja andra människor såsom familjen, grannar, vänner eller föreningsmedlemmar.

7 a) Mina möjligheter att hjälpa eller stödja andra människor på något sätt är:

- Mycket bra
- Bra
- Ganska bra
- Ganska dålig
- Dålig

**7b) Problemupplevelse**

I vilken utsträckning tycker du att ditt hälsotillstånd eller din(a) begränsning(ar) är ett problem för dina möjligheter att hjälpa och stödja andra?

- Inget problem
- I viss mån ett problem
- Ett stort problem

(Eventuell) kommentar till svaren på frågorna 7a-7b:

**YRKESVERKSAMHET**

Här följer några frågor om det arbete (betalt eller frivilligt arbete) som du nu utför. Vi vill veta vilka dina möjligheter är att hitta eller bibehålla ett betalt eller frivilligt arbete, även om detta inte är relevant för dig för tillfället.

8 a) Möjligheten att få eller bibehålla ett betalt eller ett frivilligt arbete som jag vill utföra är:

- Mycket bra
- Bra
- Ganska bra
- Ganska dålig
- Dålig

Vänligen besvara fråga 8b-8f endast om du har någon form av betalt eller frivilligt arbete. Även om du inte arbetar just nu pga. sjukdom men ändå har ett betalt eller frivilligt arbete ber vi dig att ändå fylla i fråga 8b-8f. I annat fall gå vidare till fråga 9.

8b) Möjligheten att utföra mitt arbete just *såsom* jag vill att det ska utföras är:

- mycket bra
- bra
- ganska bra
- ganska dålig
- dålig

8c) Kontakten med arbetskamrater är:

- mycket bra
- bra
- ganska bra
- ganska dålig
- dålig

8d) Möjligheten att nå eller behålla den befattning som jag vill är:

- mycket bra
- bra
- ganska bra
- ganska dålig
- dålig

8e) Möjligheten att byta funktion eller arbetsgivare är:

- mycket bra
- bra
- ganska bra
- ganska dålig
- dålig

8f) **Problemupplevelse**

I vilken utsträckning tycker du att ditt hälsotillstånd eller din(a) begränsning(ar) är ett problem i ditt arbete?

- inget problem
- i viss mån ett problem
- ett stort problem

(Eventuell) kommentar till svaren på frågorna 8a-8f:

**UTBILDNING**

De kommande frågorna handlar om på vilket sätt ditt hälsotillstånd eller din(a) begränsning(ar) har inflytande på dina möjligheter till att få (full)följa utbildning eller kurs som du vill. Om du inte vill ha fortsatt utbildning eller följa en kurs, fyller du i "inte tillämpligt" och går vidare till fråga 10. Om du skulle vilja gå en utbildning eller kurs men ditt hälsotillstånd förhindrar det, ber vi att du ändå besvarar fråga 9a-9b.

9a) Möjligheten till att få (full)följa utbildning eller kurs är:

- mycket bra                       inte tillämpligt  
 bra  
 ganska bra  
 ganska dålig  
 dålig

**9b) Problemupplevelse**

I vilken utsträckning tycker du att ditt hälsotillstånd eller din(a) begränsning(ar) är ett problem när det gäller att genomgå en utbildning eller kurs?

- inget problem  
 i viss mån ett problem  
 ett stort problem

(Eventuell) kommentar till svaren på frågorna 9a- 9b:

**SAMMANFATTNING**

I detta frågeformulär har du besvarat frågor som har att göra med inflytandet av ditt hälsotillstånd eller din(a) begränsning(ar) för ditt personliga, sociala och samhälleliga liv. När du betraktar detta, vill du i svaret på nedanstående fråga ange om du i allmänhet tycker att du själv i tillräcklig utsträckning kan bestämma vad du vill (låta) göra?

10. Min möjlighet att leva på det sätt som jag vill är:

- mycket bra  
 bra  
 ganska bra  
 ganska dålig  
 dålig

(Eventuell) kommentar till svaret på fråga 10:

1  
2  
3  
4 **Hej! Tack för ditt intresse för att använda IPA-S. Eftersom vi är ansvariga för den**  
5 **svenska översättningen av instrumentet, som inte ännu är publicerat på svenska, vill vi**  
6 **ha inflytande över dess användning och spridning.**  
7

8  
9 **Tillåtelse till användning av IPA-S under följande villkor:**

- 10  
11
- 12 • IPA-S måste användas såsom det är utformat i sin helhet, inga ändringar av får ske i
  - 13 instrumentet, exempelvis av ordalydelse
  - 14
  - 15 • IPA-S används enbart i det syfte ni angett, om ni vill använda instrumentet för andra
  - 16 ändamål kontakta undertecknad.
  - 17
  - 18 • IPA-S får ej spridas, om andra är intresserad av att använda instrumentet hänvisa dem
  - 19 till undertecknad
  - 20
  - 21 • IPA-S får ej biläggas uppsats el dylikt
  - 22
  - 23 • När IPA-S används hänvisa till någon av artiklarna:

24  
25  
26  
27 **Larsson Lund M, Fisher AG, Lexell J, Bernspång B. The impact on participation and**  
28 **autonomy questionnaire: Internal scale validity of the Swedish version for use in people with**  
29 **Spinal cord injury. *Journal of Rehabilitation Medicine*, 39, 156- 162, 2007.**  
30

31 **Larsson Lund M, Bernspång B, Nordlund A, Lexell J. Perceived participation and problems**  
32 **in participation are determinants of life satisfaction in people with spinal cord injury.**  
33 ***Disability & Rehabilitation*, 29, 1417-1422, 2007.**  
34

35  
36 **Larsson Lund, M., Nordlund, A., Nygård, L., Lexell, J & Bernspång, B. Perceptions of**  
37 **participation and predictors of perceived problems with participation in persons with spinal**  
38 **cord injury. *Journal of Rehabilitation Medicine*, 37, 3-8, 2005.**  
39

- 40  
41
- 42 • Ange att IPA-S är en översättning av 2001 av det holländska original versionen av
  - 43 IPA
  - 44
  - 45 • Om aktuellt, ange huruvida IPA-S använts utan den manual som finns till instrumentet
  - 46 (engelska manual finns på instrumentets hemsida)
  - 47

48  
49 **Ange om ni väljer att använda 2004 års (IPA 2006) version att, 2 items har lagts till i enlighet**  
50 **med förändringar av originalet, men att dess psykometriska egenskaper ännu ej prövats för**  
51 **svenska förhållanden. Dessa två items mätegenskaper har testats i den engelska versionen av**  
52 **instrumentet. Dessutom har den använts i ett antal publikationer av oss där vi studerat**  
53 **personer med post-polio:**  
54

55  
56 **Larsson Lund M, Lexell J. Perceived participation in the life situations in persons with late**  
57 **effects of polio. *J Rehabil Med*. 2008;40:659-64.**  
58

59 **Larsson Lund M, Lexell J. The relationship between participation in life situations and life**  
60 **satisfaction in people with late effects of polio. Accepterad för publicering i *Disability &***  
***Rehabilitation*.**



- 1  
2  
3  
4  
5  
6  
7  
8 • **Original version och engelsk version samt manualer till dessa finns på följande**  
9 **hemsida: <http://www.nivel.nl/> -- Sök efter IPA så kommer du rätt**

10  
11 **Vänligen**

12  
13 **Maria Larsson Lund, Univ. lektor, Umeå universitet, Inst. för samhällsmedicin och**  
14 **rehabilitering, arbetsterapi. Ansvarig för svensköversättning av IPA, förkortad IPA-S**  
15 **[maria.larsson.lund@occupther.umu.se](mailto:maria.larsson.lund@occupther.umu.se) Umeå 2008-11-03**  
16  
17  
18  
19  
20  
21  
22  
23  
24  
25  
26  
27  
28  
29  
30  
31  
32  
33  
34  
35  
36  
37  
38  
39  
40  
41  
42  
43  
44  
45  
46  
47  
48  
49  
50  
51  
52  
53  
54  
55  
56  
57  
58  
59  
60

## Fatigue Severity Scale (FSS)

I vilken utsträckning har Du känt det som nedanstående uttryck beskriver? För varje uttryck, svara spontant och ringa in den siffra som bäst motsvarar hur det har känts. Siffrorna varierar mellan 1 (stämmer inte alls) och 7 (stämmer helt).

|                                                                        | Stämmer<br>inte alls |   |   | Stämmer<br>helt |   |   |   |
|------------------------------------------------------------------------|----------------------|---|---|-----------------|---|---|---|
|                                                                        | 1                    | 2 | 3 | 4               | 5 | 6 | 7 |
| 1. Min motivation är lägre när jag är uttröttad.                       | 1                    | 2 | 3 | 4               | 5 | 6 | 7 |
| 2. Motion framkallar min trötthet.                                     | 1                    | 2 | 3 | 4               | 5 | 6 | 7 |
| 3. Jag blir lätt uttröttad.                                            | 1                    | 2 | 3 | 4               | 5 | 6 | 7 |
| 4. Trötthet begränsar min fysiska förmåga.                             | 1                    | 2 | 3 | 4               | 5 | 6 | 7 |
| 5. Trötthet orsakar ofta problem för mig.                              | 1                    | 2 | 3 | 4               | 5 | 6 | 7 |
| 6. Min trötthet hindrar mig att utföra ihållande fysiska aktiviteter.  | 1                    | 2 | 3 | 4               | 5 | 6 | 7 |
| 7. Trötthet hindrar mig från att utföra vissa uppgifter och åtaganden. | 1                    | 2 | 3 | 4               | 5 | 6 | 7 |
| 8. Trötthet är ett av mina tre mest begränsande symtom.                | 1                    | 2 | 3 | 4               | 5 | 6 | 7 |
| 9. Trötthet hindrar mitt arbete, familjeliv och sociala liv.           | 1                    | 2 | 3 | 4               | 5 | 6 | 7 |

*Bilaga 5*

1  
2  
3 **12 månadersuppföljning**

datum -----/-----/-----

Pat. Nr.....

4  
5 **Datansamlare:**.....  
6

7  
8 **Skala för bedömning**  
9  
10  
11 **av**  
12  
13  
14  
15  
16 **följder efter stroke**  
17  
18  
19  
20 **(Swedish version of SIS)**  
21  
22  
23  
24  
25  
26  
27  
28  
29  
30  
31  
32  
33  
34  
35  
36  
37  
38  
39  
40  
41  
42  
43  
44  
45  
46  
47  
48  
49  
50

Center on Aging  
University of Kansas Medical Center  
3901 Rainbow Blvd.  
Kansas City, KS 66160-7117  
(913) 588-1468

This instrument was developed by Pamela Duncan, PhD, PT, Dennis Wallace, PhD, Sue Min Lai, PhD, MS, MBA, Stephanie Studenski, MD, MPH, Dallas Johnson, PhD, and Susan Embretson, PhD

Development of this instrument has been supported by funds from The United States Department of Veteran Affairs Rehabilitation Research and Development, the University of Kansas Claude D Pepper Older Americans Independence Center (NIA 5 P60 AG 14635-02), the American Heart Association and Glaxo Wellcome Inc.

51  
52  
53  
54  
55  
56  
57  
58  
59  
60  
Copyright 1999 © University of Kansas Medical Center, Kansas City  
Rights Reserved

Distribution Center: Mapi Research Institute  
27, rue de la Villette, 69003 Lyon, France  
Translation coordinated by Mapi Research Institute

Pat nr \_\_\_\_\_

1 Datum \_\_\_\_/\_\_\_\_/\_\_\_\_  
2

12 månader

3  
4 Datainsamlare:.....5  
6 **Skala för bedömning av följder efter stroke**7  
8 Syftet med dessa frågor är att utvärdera hur din stroke har påverkat din hälsa och ditt  
9 liv. Vi vill utifrån **DIN EGEN ÅSIKT** veta vilka följder sjukdomen har haft för dig. Vi  
10 kommer att ställa frågor om de begränsningar som orsakats av din stroke, samt hur det  
11 har påverkat din livskvalitet. Till sist ber vi dig att bedöma hur du återhämtat dig från  
12 din stroke.  
1314  
15 Följande frågor handlar om de fysiska (kroppsliga) problem som kan vara en följd av  
16 din stroke.  
1718  
19  
20  
21  
22  
23  
24  
25  
26  
27  
28  
29  
30  
31  
32  
33  
34  
35  
36  
37  
38  
39  
40  
41  
42  
43  
44  
45  
46  
47  
48  
49  
50  
51  
52  
53  
54  
55  
56  
57  
58  
59  
60  

| 1. Under den senaste veckan, hur skulle du bedöma styrkan...             | Mycket styrka | Ganska mycket styrka | En viss styrka | Liten styrka | Ingen styrka alls |
|--------------------------------------------------------------------------|---------------|----------------------|----------------|--------------|-------------------|
| a. i den arm som <u>har påverkats mest</u> av din stroke?                | 5             | 4                    | 3              | 2            | 1                 |
| b. i gripförmåga i den hand som <u>har påverkats mest</u> av din stroke? | 5             | 4                    | 3              | 2            | 1                 |
| c. i det ben som <u>har påverkats mest</u> av din stroke?                | 5             | 4                    | 3              | 2            | 1                 |
| d. i den fot/vrist som <u>har påverkats mest</u> av din stroke?          | 5             | 4                    | 3              | 2            | 1                 |

Följande frågor handlar om ditt minne och din tankeförmåga.

37  
38  
39  
40  
41  
42  
43  
44  
45  
46  
47  
48  
49  
50  
51  
52  
53  
54  
55  
56  
57  
58  
59  
60  

| 2. Under den senaste veckan, hur svårt har det varit för dig att...         | Inte alls svårt | Lite svårt | Ganska svårt | Mycket svårt | Oerhört svårt |
|-----------------------------------------------------------------------------|-----------------|------------|--------------|--------------|---------------|
| a. komma ihåg saker som folk just sagt till dig?                            | 5               | 4          | 3            | 2            | 1             |
| b. komma ihåg saker som hände dagen innan?                                  | 5               | 4          | 3            | 2            | 1             |
| c. komma ihåg att göra saker (t.ex. hålla avtalade tider eller ta medicin)? | 5               | 4          | 3            | 2            | 1             |
| d. komma ihåg vilken veckodag det var?                                      | 5               | 4          | 3            | 2            | 1             |
| e. addera och subtrahera tal?                                               | 5               | 4          | 3            | 2            | 1             |
| f. koncentrera dig?                                                         | 5               | 4          | 3            | 2            | 1             |
| g. tänka snabbt?                                                            | 5               | 4          | 3            | 2            | 1             |
| h. lösa vardagsproblem?                                                     | 5               | 4          | 3            | 2            | 1             |

Datum \_\_\_/\_\_\_/\_\_\_

12 månader

Pat nr \_\_\_\_\_

Datainsamlare:.....

**Följande frågor handlar om hur du känner dig, om humörförändringar och om din förmåga att kontrollera dina känslor efter din stroke.**

| <b>3. Under den senaste veckan, hur ofta...</b>                  | <b>Aldrig</b> | <b>Sällan</b> | <b>Ibland</b> | <b>Största delen av tiden</b> | <b>Hela tiden</b> |
|------------------------------------------------------------------|---------------|---------------|---------------|-------------------------------|-------------------|
| a. har du känt dig ledsen?                                       | 5             | 4             | 3             | 2                             | 1                 |
| b. har du känt att du inte har någon som står dig nära?          | 5             | 4             | 3             | 2                             | 1                 |
| c. har du känt dig som en börda för andra?                       | 5             | 4             | 3             | 2                             | 1                 |
| d. har du känt att du inte har något att se fram emot?           | 5             | 4             | 3             | 2                             | 1                 |
| e. har du anklagat dig själv för missöden och misstag du gjorde? | 5             | 4             | 3             | 2                             | 1                 |
| f. har du haft det lika trevligt som du alltid haft?             | 5             | 4             | 3             | 2                             | 1                 |
| g. har du känt dig nervös?                                       | 5             | 4             | 3             | 2                             | 1                 |
| h. har du känt att livet är värt att leva?                       | 5             | 4             | 3             | 2                             | 1                 |
| i. har du lett och skrattat minst en gång om dagen?              | 5             | 4             | 3             | 2                             | 1                 |

**Följande frågor handlar om din förmåga att samtala med andra människor, samt din förmåga att förstå vad du läser och vad du hör i ett samtal.**

| <b>4. Under den senaste veckan, hur svårt har det varit att...</b> | <b>Inte alls svårt</b> | <b>Lite svårt</b> | <b>Ganska svårt</b> | <b>Mycket svårt</b> | <b>Oerhört svårt</b> |
|--------------------------------------------------------------------|------------------------|-------------------|---------------------|---------------------|----------------------|
| a. säga namnet på en person du haft framför dig?                   | 5                      | 4                 | 3                   | 2                   | 1                    |
| b. förstå vad som sades till dig i ett samtal?                     | 5                      | 4                 | 3                   | 2                   | 1                    |
| c. besvara frågor?                                                 | 5                      | 4                 | 3                   | 2                   | 1                    |
| d. namnge saker och ting vid dess rätta namn?                      | 5                      | 4                 | 3                   | 2                   | 1                    |
| e. delta i ett samtal med en grupp människor?                      | 5                      | 4                 | 3                   | 2                   | 1                    |
| f. samtala i telefon?                                              | 5                      | 4                 | 3                   | 2                   | 1                    |
| g. ringa upp någon samt välja rätt telefonnummer och slå numret?   | 5                      | 4                 | 3                   | 2                   | 1                    |

Datum \_\_\_/\_\_\_/\_\_\_

12 månader

Pat nr \_\_\_\_\_

Datainsamlare:.....

Följande frågor handlar om de aktiviteter du kan tänkas syssla med under en vanlig dag.

| 5. Under de senaste 2 veckorna, hur svårt har det varit att...            | Inte alls svårt | Lits svårt | Ganska svårt | Mycket svårt | Kan inte alls göra detta |
|---------------------------------------------------------------------------|-----------------|------------|--------------|--------------|--------------------------|
| a. skära upp din mat med kniv och gaffel?                                 | 5               | 4          | 3            | 2            | 1                        |
| b. klä på dig på överkroppen?                                             | 5               | 4          | 3            | 2            | 1                        |
| c. tvätta dig (bada, duscha...)?                                          | 5               | 4          | 3            | 2            | 1                        |
| d. klippa tånaglarna?                                                     | 5               | 4          | 3            | 2            | 1                        |
| e. komma snabbt till toaletten?                                           | 5               | 4          | 3            | 2            | 1                        |
| f. kontrollera blåsan (så att det inte händer en olycka)?                 | 5               | 4          | 3            | 2            | 1                        |
| g. kontrollera tarmen (så att det inte händer en olycka)?                 | 5               | 4          | 3            | 2            | 1                        |
| h. göra lättare hushållssysslor?                                          | 5               | 4          | 3            | 2            | 1                        |
| i. gå och handla?                                                         | 5               | 4          | 3            | 2            | 1                        |
| j. hantera pengar (t.ex. räkna växelpengar)?                              | 5               | 4          | 3            | 2            | 1                        |
| k. sköta ekonomin (t.ex. betala månatliga räkningar, använda bankkontot)? | 5               | 4          | 3            | 2            | 1                        |
| l. utföra tyngre hushållssysslor?                                         | 5               | 4          | 3            | 2            | 1                        |

Datum \_\_\_/\_\_\_/\_\_\_

12 månader

Pat nr \_\_\_\_\_

Datainsamlare:.....

## Följande frågor handlar om din rörelseförmåga i och utanför hemmet.

| 6. Under de senaste 2 veckorna, hur svårt har det varit att... | Inte alla svårt | Lite svårt | Ganska svårt | Mycket svårt | Kan inte alla göra detta |
|----------------------------------------------------------------|-----------------|------------|--------------|--------------|--------------------------|
| a. sitta utan att tappa balansen?                              | 5               | 4          | 3            | 2            | 1                        |
| b. stå utan att tappa balansen?                                | 5               | 4          | 3            | 2            | 1                        |
| c. gå utan att tappa balansen?                                 | 5               | 4          | 3            | 2            | 1                        |
| d. förflytta dig från sängen till en stol?                     | 5               | 4          | 3            | 2            | 1                        |
| e. resa dig från en stol utan att använda händerna som stöd?   | 5               | 4          | 3            | 2            | 1                        |
| f. gå hundra meter?                                            | 5               | 4          | 3            | 2            | 1                        |
| g. gå snabbt?                                                  | 5               | 4          | 3            | 2            | 1                        |
| h. gå upp för en trappa?                                       | 5               | 4          | 3            | 2            | 1                        |
| i. gå upp för flera trappor?                                   | 5               | 4          | 3            | 2            | 1                        |
| j. ta dig in i och ut ur en bil?                               | 5               | 4          | 3            | 2            | 1                        |

## Följande frågor handlar om din förmåga att använda den hand som har PÅVERKATS MEST av din stroke.

| 7. Under de senaste 2 veckorna, hur svårt har det varit att använda den hand som har påverkats mest av din stroke för att... | Inte alla svårt | Lite svårt | Ganska svårt | Mycket svårt | Kan inte alla göra detta |
|------------------------------------------------------------------------------------------------------------------------------|-----------------|------------|--------------|--------------|--------------------------|
| a. bära tunga saker?                                                                                                         | 5               | 4          | 3            | 2            | 1                        |
| b. vrida om nyckeln i ett lås?                                                                                               | 5               | 4          | 3            | 2            | 1                        |
| c. öppna en konservburk eller syltburk?                                                                                      | 5               | 4          | 3            | 2            | 1                        |
| d. knyta ett skosnöre?                                                                                                       | 5               | 4          | 3            | 2            | 1                        |
| e. plocka upp ett litet mynt?                                                                                                | 5               | 4          | 3            | 2            | 1                        |

Datum \_\_\_/\_\_\_/\_\_\_

12 månader

Pat nr \_\_\_\_\_

Datainsamlare:.....

Följande frågor handlar om hur din stroke har påverkat din förmåga att delta i de aktiviteter som du brukar göra, saker som är viktiga för dig och som hjälper dig att finna livet meningsfullt.

| <b>8. Under de senaste 4 veckorna, hur stor del av tiden har du haft begränsningar när det gäller...</b> | <b>Aldrig</b> | <b>Sällan</b> | <b>Ibland</b> | <b>Största delen av tiden</b> | <b>Hele tiden</b> |
|----------------------------------------------------------------------------------------------------------|---------------|---------------|---------------|-------------------------------|-------------------|
| <b>a. arbete (betalt, frivilligt eller annat)?</b>                                                       | 5             | 4             | 3             | 2                             | 1                 |
| <b>b. aktiviteter tillsammans med andra?</b>                                                             | 5             | 4             | 3             | 2                             | 1                 |
| <b>c. lugna fritidssysselsättningar?</b>                                                                 | 5             | 4             | 3             | 2                             | 1                 |
| <b>d. aktiva fritidssysselsättningar?</b>                                                                | 5             | 4             | 3             | 2                             | 1                 |
| <b>e. din roll som familjemedlem och/eller vän?</b>                                                      | 5             | 4             | 3             | 2                             | 1                 |
| <b>f. ditt deltagande i andliga eller religiösa aktiviteter?</b>                                         | 5             | 4             | 3             | 2                             | 1                 |
| <b>g. din förmåga att visa dina känslor för närstående?</b>                                              | 5             | 4             | 3             | 2                             | 1                 |
| <b>h. din förmåga att ha kontroll över ditt liv så som du önskar?</b>                                    | 5             | 4             | 3             | 2                             | 1                 |
| <b>i. din förmåga att hjälpa andra människor?</b>                                                        | 5             | 4             | 3             | 2                             | 1                 |



Datum \_\_\_/\_\_\_/\_\_\_

12 månader

Pat nr \_\_\_\_\_

Datainsamlare:.....

**9. Återhämtning efter din stroke**

**Ange på nedanstående skala hur mycket du har återhämtat dig från din stroke. På skalan mellan 0 och 100 betyder 100 att du är helt återställd och 0 att du inte återhämtat dig alls.**

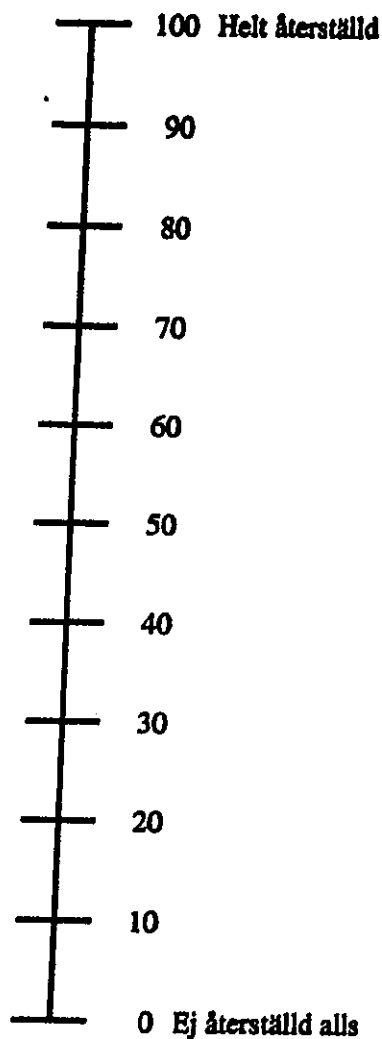

Nedan följer ett antal frågor om hur tillfreds Du är med olika aspekter av Ditt liv.

För var och en av dessa frågor vill vi att Du ringar in en siffra från 1 till 6, där 1 betyder mycket otillfredsställande och 6 betyder mycket tillfredsställande.

1 = mycket otillfredsställande  
 2 = otillfredsställande  
 3 = ganska otillfredsställande  
 4 = ganska tillfredsställande  
 5 = tillfredsställande  
 6 = mycket tillfredsställande

|                                                                                      |   |   |   |   |   |   |                                                        |
|--------------------------------------------------------------------------------------|---|---|---|---|---|---|--------------------------------------------------------|
| 38. Livet är i allmänhet                                                             | 1 | 2 | 3 | 4 | 5 | 6 |                                                        |
| 39. Yrkes- / sysselsättnings-situationen är                                          | 1 | 2 | 3 | 4 | 5 | 6 |                                                        |
| 40. Ekonomin är                                                                      | 1 | 2 | 3 | 4 | 5 | 6 |                                                        |
| 41. Fritidssituationen är                                                            | 1 | 2 | 3 | 4 | 5 | 6 |                                                        |
| 42. Kontakterna med vänner och bekanta är                                            | 1 | 2 | 3 | 4 | 5 | 6 |                                                        |
| 43. Sexuallivet är                                                                   | 1 | 2 | 3 | 4 | 5 | 6 |                                                        |
| 44. Förmågan att klara mig själv ( gäller klädsel, tvätt/bad, gångförmåga o dyl.) är | 1 | 2 | 3 | 4 | 5 | 6 |                                                        |
| 45. Familjelivet är                                                                  | 1 | 2 | 3 | 4 | 5 | 6 | 0 <input type="checkbox"/> har ej någon familj         |
| 46. Parförhållandet är                                                               | 1 | 2 | 3 | 4 | 5 | 6 | 0 <input type="checkbox"/> har ej något parförhållande |
| 47. Kroppsliga hälsan är                                                             | 1 | 2 | 3 | 4 | 5 | 6 |                                                        |
| 48. Psykiska hälsan är                                                               | 1 | 2 | 3 | 4 | 5 | 6 |                                                        |

enligt Scandinavian Stroke Study Group, a a m m a a a a  
 Bedömning utförd, datum: 19 (000)

*Bilaga 5*  
*Scandinavian Stroke Scale*

Medvetande

Fullt medveten (6)

Somnolent - kan väckas till fullt medvetande (4)

Reagerar på tilltal, men är inte fullt medveten (2) - (000)

Ögonrörelser

Ingen blickpares (4)

Har blickpares (2)

Har "deviation conjugée" (0) - (000)

Armstyrka

Lyfter armen med normal styrka (6)

Lyfter armen med nedsatt styrka (5)

Lyfter armen med armbågen böjd (4)

Kan röra men inte mot tyngdkraften (2)

Totalförlamad (0) - (000)

Handstyrka

Normal styrka (6)

Nedsatt styrka i hela rörelseområdet (4)

Kan röra något, men fingertopparna når inte handflatan (2)

Totalförlamad (0) - (000)

Benstyrka

Normal styrka (6)

Lyfter benet rakt med nedsatt styrka (5)

Lyfter benet med böjt knä (4)

Kan röra men inte mot tyngdkraften (2)

Totalförlamad (0) - (000)

Orienterad

Adekvat för tid, rum och person (6)

2 av dessa (4)

1 av dessa (2)

Helt desorienterad (0) - (000)

Tal

Ingen afasi (10)

Begränsat ordförråd eller inkorrekt tal (6)

Mer än ja/nej, men inga längre meningar (3)

Endast ja/nej eller mindre (0) - (000)

Facialis pares

ingen/tveksam (2)

synlig (0)

(000)  
 (000)

Gång

Går 5 meter utan hjälpmedel (12)

Går med hjälpmedel (9)

Går med hjälp av annan person (6)

Sitter utan stöd (3)

Sängbunder/rullstol (0) - (000)

Total prognostisk poäng - (000)

Total långsiktig poäng - (000)

1  
2  
3 NÄRSTÅENDES HJÄLPINSATSER  
4

5  
6 *Insatser avser insatser från den person som fyller i Care-giver burden scale vid 3 månader efter stroke.*  
7 *Beräkningen görs på hur det har varit under den senaste veckan. Övriga insatser av närstående som ej*  
8 *fyller i Caregiver burden scale registreras under "Annan regelbunden hjälp eller tillsyn".*  
9

10 *Hjälpinsatser avser sådant som personen tidigare själv utfört men inte längre klarar pga stroke. (Ex*  
11 *Ingen tid skall räknas om patienten får hjälp av närstående att laga mat såvida det inte är en*  
12 *rollfördelning pga insjuknandet i stroke. Däremot räknas tid om tillsyn behövs för dusch. Övriga*  
13 *insatser kan inkludera gräsklippning, läkarbesök, att ta medicin etc.)*  
14  
15

16  
17 Personlig ADL  
18

19 Hur många timmar /vecka behöver din anhörige hjälp nu med födointag, kontinens, förflyttning,  
20 toalettbesök, på-/avklädning, badning/dusch  
21

22  
23 .....tim/ vecka  
24  
25

26 Instrumentell ADL  
27

28  
29 Hur många timmar /vecka behöver din anhörige hjälp nu med matlagning, att åka allmänna  
30 kommunikationer, matinköp och städning?  
31

32  
33 .....tim/vecka  
34  
35

36 Övriga insatser  
37

38  
39 Hur många timmar /vecka behöver din anhörige hjälp utöver det som tidigare nämnts med sådant som  
40 han/hon tidigare gjorde själv eller som tillkommit pga av stroke ?  
41

42  
43  
44 .....tim/vecka  
45  
46

47 Hjälp med:  
48  
49

50 .....  
51 .....  
52 .....  
53 .....  
54 .....  
55 .....  
56 .....  
57 .....  
58  
59  
60

1 **Samhällsmedicinska institutionen**  
2 **Lunds universitet**

## 3 **Enkät till anhörig**

4  
5  
6 **Här är några frågor som berör Din situation som anhörig. Kryssa för det alternativ som bäst**  
7 **passar in för Dig. Ge endast ett svar på varje fråga.**

### 8 **1. Känner Du Dig trött och utarbetad?**

- 9  
10  
11  
12  
13  
14  
15  
16  
17 **Nej, inte alls**   
18 **Nej, knappast**   
19 **Ja, i viss mån**   
20 **Ja, i hög grad**   
21  
22

### 23 **2. Känner Du Dig ensam och isolerad p g a din anhöriges problem?**

- 24  
25  
26 **Nej, inte alls**   
27 **Nej, knappast**   
28 **Ja, i viss mån**   
29 **Ja, i hög grad**   
30  
31

### 32 **3. Tycker Du att Du får ta för mycket ansvar för din anhöriges väl och ve?**

- 33  
34  
35 **Nej, inte alls**   
36 **Nej, knappast**   
37 **Ja, i viss mån**   
38 **Ja, i hög grad**   
39  
40  
41

### 42 **4. Känns det ibland som om Du skulle vilja fly undan hela den situation Du befinner Dig i?**

- 43  
44  
45 **Nej, inte alls**   
46 **Nej, knappast**   
47 **Ja, i viss mån**   
48 **Ja, i hög grad**   
49  
50

### 51 **5. Ställs Du inför rent praktiska problem i vården som Du tycker är svåra att lösa?**

- 52  
53  
54 **Nej, inte alls**   
55 **Nej, knappast**   
56 **Ja, i viss mån**   
57 **Ja, i hög grad**   
58  
59  
60

1  
2 6. Kan Du bli sårad och arg på Din anhörige?  
3

- 4 Nej, inte alls   
5 Nej, knappast   
6 Ja, i viss mån   
7 Ja, i hög grad   
8  
9

10  
11 7. Tycker Du att Din hälsa har blivit lidande p g a att Du tagit hand om Din anhörige?  
12

- 13 Nej, inte alls   
14 Nej, knappast   
15 Ja, i viss mån   
16 Ja, i hög grad   
17  
18

19  
20 8. Har Din anhöriges problem lett till att umgänget med andra, t ex släkt och vänner, minskat  
21 för Dig?  
22

- 23 Nej, inte alls   
24 Nej, knappast   
25 Ja, i viss mån   
26 Ja, i hög grad   
27  
28

29  
30 9. Finns det något i Din anhöriges bostad som gör det besvärligt att ta hand om honom eller  
31 henne?  
32

- 33 Nej, inte alls   
34 Nej, knappast   
35 Ja, i viss mån   
36 Ja, i hög grad   
37  
38

39  
40 10. Känner Du Dig bunden av Din anhöriges problem?  
41

- 42 Nej, inte alls   
43 Nej, knappast   
44 Ja, i viss mån   
45 Ja, i hög grad   
46  
47

48  
49 11. Känner Du Dig besvärad av Din anhöriges beteende?  
50

- 51 Nej, inte alls   
52 Nej, knappast   
53 Ja, i viss mån   
54 Ja, i hög grad   
55  
56  
57  
58  
59  
60

1  
2 **Samhällsmedicinska institutionen**  
3 **Lunds universitet**

3

4  
5  
6 **12. Leder Din anhöriges problem till att Du inte kan göra det Du hade tänkt göra vid denna tid**  
7 **i livet?**

- 8  
9  
10 **Nej, inte alls**   
11 **Nej, knappast**   
12 **Ja, i viss mån**   
13 **Ja, i hög grad**   
14  
15

16  
17 **13. Tycker Du att det är fysiskt påfrestande för Dig att ta hand om Din anhörige?**

- 18  
19  
20 **Nej, inte alls**   
21 **Nej, knappast**   
22 **Ja, i viss mån**   
23 **Ja, i hög grad**   
24  
25

26  
27 **14. Tycker Du att Din anhörige tar så mycket tid att Du inte får tillräckligt med tid för Dig**  
28 **själv?**

- 29  
30 **Nej, inte alls**   
31 **Nej, knappast**   
32 **Ja, i viss mån**   
33 **Ja, i hög grad**   
34  
35

36  
37 **15. Oroar Du Dig över att Du inte ska kunna ta hand om Din anhörige på rätt sätt?**

- 38  
39 **Nej, inte alls**   
40 **Nej, knappast**   
41 **Ja, i viss mån**   
42 **Ja, i hög grad**   
43  
44  
45

46 **16. Kan Du ibland skämmas över Din anhöriges uppförande?**

- 47  
48 **Nej, inte alls**   
49 **Nej, knappast**   
50 **Ja, i viss mån**   
51 **Ja, i hög grad**   
52  
53  
54

55  
56 **17. Finns det något i omgivningen runt Din anhöriges hem som gör det besvärligt att ta hand**  
57 **om honom/ henne?**

- 58  
59 **Nej, inte alls**   
60 **Nej, knappast**   
61 **Ja, i viss mån**   
62

1  
2  
3 18. Har det inneburit någon ekonomisk uppoffring för Dig att ta hand om Din anhörige?  
4

- 5 Nej, inte alls   
6 Nej, knappast   
7 Ja, i viss mån   
8 Ja, i hög grad   
9

10  
11  
12 19. Tycker Du att det är psykiskt påfrestande för Dig att ta hand om Din anhörige?  
13

- 14 Nej, inte alls   
15 Nej, knappast   
16 Ja, i viss mån   
17 Ja, i hög grad   
18  
19

20  
21 20. Har Du ibland en känsla av att livet behandlat Dig orättvist?  
22

- 23 Nej, inte alls   
24 Nej, knappast   
25 Ja, i viss mån   
26 Ja, i hög grad   
27  
28  
29

30  
31 21. Hade Du tänkt Dig att livet skulle vara annorlunda i den ålder som Du är i nu?  
32

- 33 Nej, inte alls   
34 Nej, knappast   
35 Ja, i viss mån   
36 Ja, i hög grad   
37  
38  
39

40 22. Undviker Du att bjuda hem vänner och bekanta på Din anhöriges problem?  
41

- 42 Nej, inte alls   
43 Nej, knappast   
44 Ja, i viss mån   
45 Ja, i hög grad   
46  
47  
48  
49  
50

51 *Tack för Din medverkan!*  
52  
53  
54  
55  
56  
57  
58  
59  
60



1  
2  
3  
4  
5  
6  
7  
8  
9  
10  
11  
12  
13  
14  
15  
16  
17  
18  
19  
20  
21  
22  
23  
24  
25  
26  
27  
28  
29  
30

# CANADIAN OCCUPATIONAL PERFORMANCE MEASURE

SVENSK VERSION

Författare:

Mary Law, Sue Baptiste, Anne Carswell,  
Mary Ann McColl, Helene Polatajko, Nancy Pollock

31 The Canadian Occupational Performance Measure (COPM) är en individualiserad bedömning,  
32 konstruerad att användas av arbetsterapeuter för att konstatera självupplevd förändring av  
33 aktivitetsutförande över tid.

35 Översatt av Kersti Samuelsson, Neurorehab, US, 581 85 Linköping 1997

|                                         |                                           |                            |
|-----------------------------------------|-------------------------------------------|----------------------------|
| 38 Pat Namn:                            |                                           |                            |
| 41 Ålder:                               | 42 Kön:                                   | 43 Personnr:               |
| 44 Diagnos:                             |                                           | 45 Insjukt datum:          |
| 47 Uppgiftslämnare (om inte patienten): |                                           |                            |
| 50 Datum för bedömning:                 | 51 Planerat datum för<br>52 ny bedömning: | 53 Datum för ny bedömning: |
| 56 Arbetsterapeut:                      |                                           |                            |
| 59 Klinik:                              |                                           |                            |

**1C: Fritid**

**BETYDELSE**

Stillsam fritid  
(ex v hobbies,  
hantverk, läsa)

\_\_\_\_\_

\_\_\_\_\_

\_\_\_\_\_

□

□

□

Aktiv fritid  
(ex v sport,  
utflykt, resa)

\_\_\_\_\_

\_\_\_\_\_

\_\_\_\_\_

□

□

□

Social samvaro  
(ex v besöka,  
ringa, parties,  
brevväxling)

\_\_\_\_\_

\_\_\_\_\_

\_\_\_\_\_

□

□

□

**STEG 3 OCH 4: POÄNG - FÖRSTA BEDÖMNING OCH UPPFÖLJNING**

Bekräfta med patienten/klienten de 5 viktigaste problemen och notera dessa nedan. Genom att använda poängmallen ombuds patienten att värdera varje problem under utförande och tillfredsställelse, beräkna därefter total poäng. Total poäng beräknas genom att addera utförandet eller tillfredsställelsepöäng för samtliga problem och dividera med antalet problem. Vid uppföljning, poängsätter patienten åter varje problem under utförande och tillfredsställelse. Beräkna den nya poängen och skillnaden.

**Första bedömning:**

**Uppföljning:**

Problem med utförande av aktivitet

Utförande 1

Tillfredsställelse 1

Utförande 2

Tillfredsställelse 2

1. \_\_\_\_\_

2. \_\_\_\_\_

3. \_\_\_\_\_

4. \_\_\_\_\_

5. \_\_\_\_\_

□

□

□

□

□

□

□

□

□

□

□

□

□

□

□

□

□

□

□

□

**POÄNG:**

Utförande  
Poäng 1

Tillfredsställelse  
Poäng 1

Utförande  
Poäng 2

Tillfredsställelse  
Poäng 2

Total utförande-poäng / Total tillfredsställelse-poäng / antal problem =

□ / □ / □ = □

□ / □ / □ = □

□ / □ / □ = □

□ / □ / □ = □

## TILLFREDSSTÄLLELSE MED VÅRDEN

NR .....

DATUM.....

HÄR FÖLJER NÅGRA PÅSTÄENDEN,  
I VILKEN UTSTRÄCKNING STÄMMER PÅSTÄENDET MED Din MED ETT KRYSS I  
LÄMPLIG RUTA

1. Den personal som jag har kommit i kontakt med har givit mig mycket god information om min sjukdom

Stämmer

Stämmer inte alls

    

2. Den personal som jag har mött har engagerat sig mycket i min situation och visat mig mycket stor medkänsla

Stämmer

Stämmer inte alls

    

3. Den personal jag har träffat har bemött mig mycket väl

Stämmer

Stämmer inte alls

    

4. Det har varit mycket lätt att komma i kontakt med (få tag i) sjukvårds- och rehabiliteringspersonal när det har behövts.

Stämmer

Stämmer inte alls

1  
2  
3  
4  
5  
6 **5. Jag har kommit i kontakt med all den expertis mitt tillstånd krävt.**

7  
8  
9 **Stämmer**

**Stämmer inte alls**

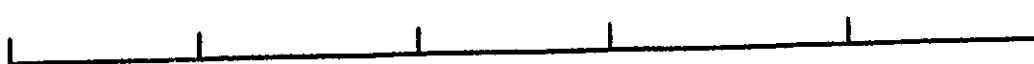

13  
14  
15 **Om det inte stämmer, vilken expertis har Du behövt men inte kommit i kontakt med?**

16  
17  
18  
19 .....

20  
21  
22  
23 **6. Kostnaderna för min vård har varit mycket betungande**

24  
25 **Stämmer**

**Stämmer inte alls**

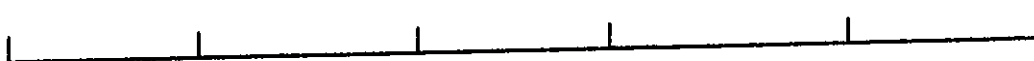

29  
30  
31 **7. Jag har fått den träning som mitt tillstånd krävt**

32  
33  
34  
35 **Stämmer**

**Stämmer inte alls**

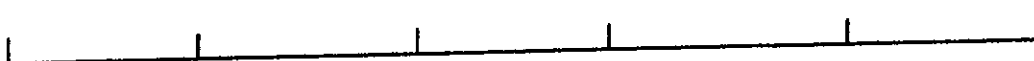

39  
40  
41  
42 **8. Jag har haft behov av tekniska hjälpmedel**

43  
44 **Ja**

**Nej**

45  
46  
47  
48 **Om Du har svarat ja fortsätt med fråga 8b; om nej gå till fråga 9.**

49  
50 **8.b Jag har fått de tekniska hjälpmedel som mitt tillstånd har krävt**

51  
52  
53 **Stämmer**

**Stämmer inte alls**

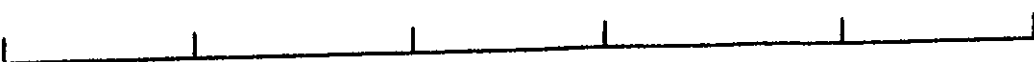

1  
2  
3 **9. Jag har haft behov av arbetsplatsanpassning**

4 Ja  Nej

5  
6  
7  
8  
9 Om Du har svarat ja fortsatt med fråga 9b om nej gå till fråga 10.

10 **9.b Jag har fått den arbetsplatsanpassning som mitt tillstånd har krävt**

11  
12  
13  
14  
15 **Stämmer**

16 **Stämmer inte alls**

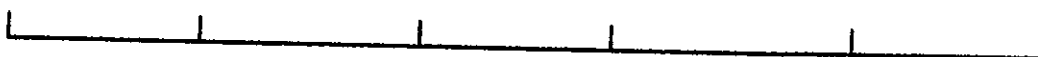

23 **10. Jag har haft behov av bostadsanpassning**

24 Ja  Nej

25  
26  
27  
28 Om Du har svarat ja fortsatt med fråga 10b; om nej gå till fråga 11.

29 **10.b Jag har fått den bostadsanpassning som mitt tillstånd har krävt**

30  
31  
32  
33  
34 **Stämmer**

35 **Stämmer inte alls**

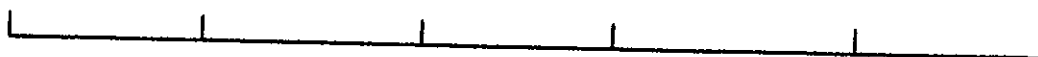

42 **11. Jag har haft behov av färdtjänst**

43 Ja  Nej

44  
45  
46  
47 Om Du har svarat ja fortsatt med fråga 11b; om nej gå till fråga 11.

48 **11.b Jag har fått den bostadsanpassning som mitt tillstånd har krävt**

49  
50  
51  
52  
53  
54 **Stämmer**

55 **Stämmer inte alls**

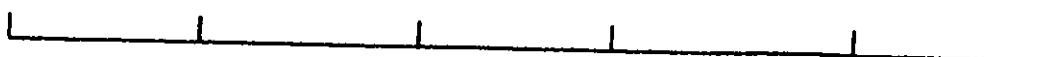

1  
2  
3  
4  
5 **12. Jag har i tillräcklig omfattning fått träffa samma personal (läkare, sjuksköterska,**  
6 **sjukgymnast, arbetsterapeut, logoped, kurator etc) efter insjuknandet i stroke.**  
7  
8

9  
10 **Stämmer** **Stämmer inte alls**

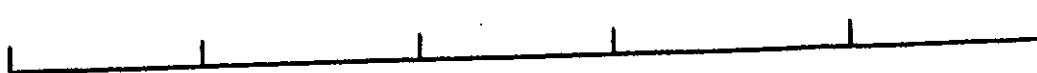

11  
12  
13  
14  
15  
16  
17 **Om det inte stämmer, för vilken kategori har det brustit?**

18 .....  
19 .....  
20 .....  
21 .....  
22 .....  
23 .....  
24 .....

25 **13. Jag är mycket nöjd med den vård jag har fått.**

26  
27  
28 **Stämmer** **Stämmer inte alls**

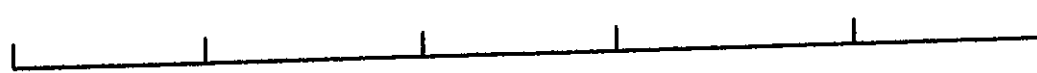

29  
30  
31  
32  
33  
34  
35 **Om det inte stämmer, vad har fattats?**

36 .....  
37 .....  
38 .....  
39 .....  
40 .....  
41 .....  
42 .....

43 **14. Jag anser att patienten skall delta vid planeringen av utskrivningen från sjukhus**

44  
45  
46 **Stämmer** **Stämmer inte alls**

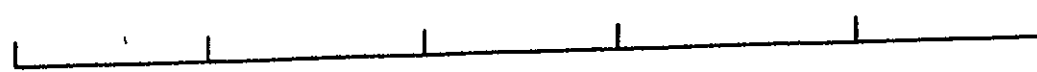

47  
48  
49  
50  
51  
52  
53  
54 **15. Jag har deltagit i planeringen av utskrivningen från sjukhuset**

55  
56  
57 **Stämmer** **Stämmer inte alls**

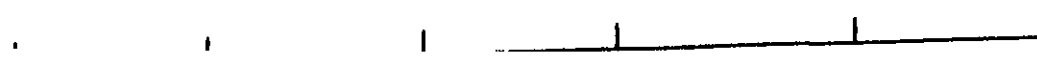

1  
2  
3  
4  
5  
6  
7  
8  
9  
10  
11  
12  
13  
14  
15  
16  
17  
18  
19  
20  
21  
22  
23  
24  
25  
26  
27  
28  
29  
30  
31  
32  
33  
34  
35  
36  
37  
38  
39  
40  
41  
42  
43  
44  
45  
46  
47  
48  
49  
50  
51  
52  
53  
54  
55  
56  
57  
58  
59  
60

**16. Jag anser att patienten skall delta i planeringen av rehabilitering och träning efter stroke.**

**Stämmer**

**Stämmer inte alls**

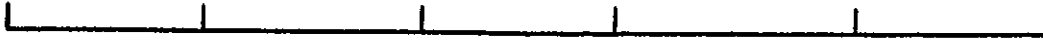

**17. Jag har deltagit i planeringen av rehabilitering och träning efter stroke**

**Stämmer**

**Stämmer inte alls**

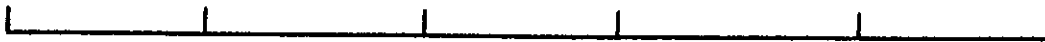

**18. Jag tycker att jag har fått för lite träning efter insjuknandet i stroke**

**Stämmer**

**Stämmer inte alls**

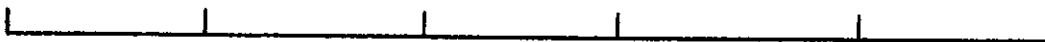

**Övriga synpunkter**

---

---

---

---

---

## TILLFREDSSTÄLLELSE MED VÅRDEN

Här följer ett antal påståenden, som vi ber dig bedöma i vilken utsträckning de stämmer överens med din åsikt.

1. Den personal jag har mött har engagerat sig mycket i min och min anhörigas situation och visat oss mycket stor medkänsla

stämmer
 


 stämmer inte alls

kommentar:.....  
 .....  
 .....

2. Det har varit mycket lätt att komma i kontakt med den personal som vi har behövt vad gäller sjukvård/rehabilitering och/eller social service (t ex biståndshandläggare)

stämmer
 


 stämmer inte alls

kommentar:.....  
 .....  
 .....

3. Min närstående har fått den rehabilitering hans/hennes tillstånd har krävt

stämmer
 


 stämmer inte alls

om det inte stämmer vilken rehabilitering skulle behövas.....  
 .....  
 .....

4. Min närstående har fått den vård hans/hennes tillstånd har krävt

stämmer
 


 stämmer inte alls

om det inte stämmer vilken vård skulle behövas.....



1  
2  
3  
4  
5  
6  
7  
8  
9  
10  
11  
12  
13  
14  
15  
16  
17  
18  
19  
20  
21  
22  
23  
24  
25  
26  
27  
28  
29  
30  
31  
32  
33  
34  
35  
36  
37  
38  
39  
40  
41  
42  
43  
44  
45  
46  
47  
48  
49  
50  
51  
52  
53  
54  
55  
56  
57  
58  
59  
60

5. Vi har fått den information, rådgivning och eventuell utredning som min närstående behöver angående bilkörning efter stroke

stämmer     stämmer inte alls

kommentar: .....  
.....  
.....

6. Jag har varit i behov av stöd (ex avlastning, samtal, rådgivning) efter att min närstående insjuknade i stroke. Nej  Ja

Om ja, Jag har fått det stöd (ex avlastning, samtal, rådgivning) som jag behöver efter att min närstående insjuknade i stroke

stämmer     stämmer inte alls

kommentar: .....  
.....  
.....

7. Vi är i behov av hemtjänst Nej  Ja

Om ja; Vi har fått hemtjänst i den omfattning som vi behöver

stämmer     stämmer inte alls

8. Vi/ min närstående är, eller har varit, i behov av att byta boende Nej  Ja

Om ja,

Vi har fått den hjälp vi behöver för att ändra boendesituationen.

stämmer     stämmer inte alls

om det inte stämmer till vilket boende vilken vård skulle behövas.....  
 .....  
 .....

9. Jag har fått delta i planering av vård och rehabilitering av min närstående efter att hon/han insjuknade i stroke.

stämmer     stämmer inte alls

kommentarer.....  
 .....  
 .....  
 .....  
 .....  
 .....

15. Sammantaget är jag är mycket nöjd med den vård, och rehabilitering min närstående har fått under detta år.

stämmer     stämmer inte alls

kommentarer.....  
 .....  
 .....

D11aga 0

1  
2  
3 **Frågeguide till en kvalitativ studie avseende erfarenhet av**  
4 **klientcentrerad ADL-intervention.**  
5

6 **Frågor avseende före Interventionen**  
7

- 8  
9 1. Kan Du beskriva hur det fungerade att utföra en aktivitet som du ville utföra i början efter  
10 insjuknandet?  
11  
12 2. Vad var det som fungerade bra?/Vad anser Du fungerade sämre?  
13  
14 3. Hur upplevde Du den här situationen?  
15  
16 4. Kan Du berätta om det kändes viktigt för dig/var betydelsefullt för dig att utföra din  
17 aktivitet?  
18  
19 5. Och i så fall var vad det som var viktigt/inte var viktigt?

20 **Frågor om hur det fungerar efter Interventionen**  
21

- 22 6. Kan Du konkret beskriva ett ADL-träningstillfälle för den aktivitet som du hade valt att  
23 träna?  
24  
25 7. Hur fungerar det nu med att utföra den aktiviteten?  
26  
27 8. Vad är det som fungerade bra?  
28  
29 9. Vad anser Du fungerar dåligt?  
30  
31 10. Hur upplever Du den här situationen?  
32  
33 11. Kan Du berätta om det känns viktigt för dig/är betydelsefullt för dig att utföra din aktivitet?  
34  
35 12. Och i så fall vad är det som är viktigt/inte viktigt?  
36  
37 13. Anser Du att det är någon skillnad nu att utföra den aktiviteten till skillnad mot tidigare?  
38  
39 14. På vilket sätt skiljer det sig? Hur upplever Du det?  
40  
41 15. Kan Du berätta hur Du har lärt dig att fungera i den aktivitet du valde att träna?  
42  
43 16. Kan Du beskriva vad det är som har hjälpt Dig att fungera bättre i dina aktiviteter?  
44  
45 17. Vad är din upplevelse av ADL-träningen?  
46  
47 18. Hur upplevde Du att ADL-träningen var upplagd?  
48  
49 19. När gör du träningen? Varför gör Du träningen?  
50  
51 20. Hur samarbetade du och arbetsterapeuten/hemrehabteamet? Hur kan Du beskriva din  
52 delaktighet i ADL-träning?  
53  
54 21. Har du haft någon närstående som varit delaktig och i så fall hur?  
55  
56 22. Kan Du beskriva hur och om Du anpassar miljön?  
57  
58 23. Anser du att du har lärt dig att använda nya tillvägagångssätt i dina dagliga aktiviteter?  
59  
60 Har Du utvecklat någon egen metodik för detta?  
24. Hur fortsatte du din ADL-träning? Kunde Du utföra detta på eget initiativ utanför ADL-  
träningen? Känner Du dig mer oberoende?  
25. Finns det något Du skulle vilja tillägga eller förtydliga?

D11aga 5

## Frågeguide till gruppintervju med arbetsterapeuter som genomfört en klientcentrerad ADL-intervention

Personen som intervjuar tydliggör inledningsvis att syftet med intervjun är att samla deltagarnas erfarenheter och kunskap som de har utifrån workshopen samt utifrån att ha implementerat en forskningsbaserad ny intervention avseende aktiviteter i dagligt liv (ADL). Fokus för intervjun är att få mer kunskap om hur man integrerar forskning med praktisk kunskap och hur detta går att tillämpa i kliniken.

- Deltagarna ombeds resonera om och reflektera över vilka faktorer som är avgörande för att träning i ADL ska bli framgångsrik.
- Har deltagarna använt sig av kunskapen från workshopen och har de kunnat genomföra träning enligt det som de tillsammans beslutade?
- Kan man ge exempel på vad som fungerat bra och vad som fungerat dåligt.
- Vad var styrkor och vad var svagheter i workshopen?
- Är det något deltagarna vill förändra i workshopen?
- Finns det något som ni idag skulle vilja förändra i själva interventionen?
- Hur kan man tillgodogöra sig evidens/forskningsresultat i det dagliga arbetet?
- Hur kan man kommunicera och förena den kliniska världen och forskarvärlden?
- Hur kan det ske rent praktiskt och konkret?
- Hur förändrar man arbetssätt? ("Vi gör ju som vi alltid har gjort")
- Vad behövs för att vilja förändra? Vilka är era erfarenheter?
- Finns det ytterligare saker som ni vill tillägga?

Etikansökan

Bilaga 9

Projektet, *en randomiserad kontrollerad av klientcentrerad ADL-intervention för personer med stroke*, medges och har godkänts ur patientsäkerhets- och resurssynpunkter av undertecknad som är medicinskt och administrativt ledningsansvarig:

**Sinikka Svensson, verksamhetschef Geriatriska kliniken Karolinska, Huddinge**

2019-03-23

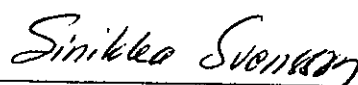

Datum, ort

Underskrift

Namnförtydligande

1  
2  
3  
4  
5  
6  
7  
8  
9  
10  
11  
12  
13  
14  
15  
16  
17  
18  
19  
20  
21  
22  
23  
24  
25  
26  
27  
28  
29  
30  
31  
32  
33  
34  
35  
36  
37  
38  
39  
40  
41  
42  
43  
44  
45  
46  
47  
48  
49  
50  
51  
52  
53  
54  
55  
56  
57  
58  
59  
60  
Etikansökan

Bilaga 9

**Intyg om projektets genomförande (ansvar och resursanvändning)  
från berörda verksamhetschefer och ansvariga forskare****Lars-Olof Ronnevi, Leg. läk, docent klinikchef neurologiska kliniken Karolinska  
Universitetssjukhuset**

2009-03-19

Datum, ort



Underskrift

Lars -Olof Ronnevi

Namnförtydligande

## Etikansökan

Bilaga

9

**Projektet *En randomiserad kontrollerad av klientcentrerad ADL-intervention för personer med stroke* som skall genomföras av en forskargrupp ledd av Lena von Koch, docent, Karolinska Institutet under perioden 2009 09 01 tom 2010 12 31 medges och har godkänts av undertecknad ur ansvars och resurssynpunkt.**

**Eva Boëthius, verksamhetschef, Danderydsgeriatriken**

Danderyd 090326 Eva Boëthius

Datum, ort

Underskrift

Namnförtydligande

Eva Boëthius  
Verksamhetschef/Överläkare  
Danderydsgeriatriken SLSSO  
Tel: 08-655 70 00  
Fax: 08-622 61 54

1  
2  
3  
4  
5  
6  
7  
8  
9  
10  
11  
12  
13  
14  
15  
16  
17  
18  
19  
20  
21  
22  
23  
24  
25  
26  
27  
28  
29  
30  
31  
32  
33  
34  
35  
36  
37  
38  
39  
40  
41  
42  
43  
44  
45  
46  
47  
48  
49  
50  
51  
52  
53  
54  
55  
56  
57  
58  
59  
60  
Etikansökan

Bilaga

9

**Intyg om projektets genomförande (ansvar och resursanvändning) från berörda verksamhetschefer och ansvariga forskare). För hämtning av journaluppgifter från personer som vårdats på stroke enheten Danderyds sjukhus under tiden 2009 09 01 tom 2010 12 31.**

**Weine Lannsjö, verksamhetschef medicinkliniken Danderyds sjukhus**

|                         |                                                                                     |                                                                                    |
|-------------------------|-------------------------------------------------------------------------------------|------------------------------------------------------------------------------------|
| <i>Stockholm 090325</i> | 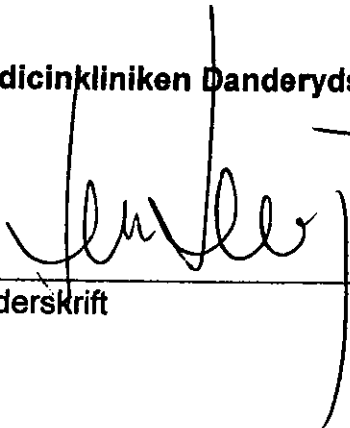 | <b>WEINE LANNSJÖ</b><br>Verksamhetschef<br>Medicinkliniken<br>Danderyds sjukhus AB |
| Datum, ort              | Underskrift                                                                         | Namnförtydligande                                                                  |



1  
2  
3  
4 Etikansökan

Bilaga

9

5  
6  
7  
8  
9 **Intyg om projektets genomförande (ansvar och resursanvändning)**  
10 **från berörda verksamhetschefer och ansvariga forskare**  
11  
12  
13  
14  
15  
16  
17  
18  
19  
20

21 **Elisabeth Sundström, Vårdenhetschef rehabiliteringsmedicin,**  
22 **Verksamhetsområde Medicin 2, Division medicin, Landstinget Gävleborg**  
23  
24  
25  
26  
27

28  
29 090312 Sandviken      Elisabeth Sundström      Elisabeth Sundström  
30 Datum, ort                      Underskrift                      Namnförtydligande  
31  
32  
33  
34  
35  
36  
37  
38  
39  
40  
41  
42  
43  
44  
45  
46  
47  
48  
49  
50  
51  
52  
53  
54  
55  
56  
57  
58  
59  
60

1  
2 Etikansökan  
3  
4  
5  
6

Bilaga 9

7 **Intyg om projektets genomförande (ansvar och resursanvändning)**  
8 **från berörda verksamhetschefer och ansvariga forskare**  
9  
10  
11  
12  
13  
14  
15  
16  
17  
1819 **Margreth Rosenberg, Verksamhetschef, Verksamhetsområde rehabilitering,**  
20 **Division primärvård. Landstinget Gävleborg**  
21  
22  
23  
2425 MARGRETH ROSENBERG  
26 Verksamhetschef  
27 Rehabilitering  
28 Tfn: 026 - 15 51 07

29 Datum, ort

30 Underskrift

31 Namnförtydligande  
32  
33  
34  
35  
36  
37  
38  
39  
40  
41  
42  
43  
44  
45  
46  
47  
48  
49  
50  
51  
52  
53  
54  
55  
56  
57  
58  
59  
60

Etikansökan

Bilaga 9

**Intyg om projektets genomförande (ansvar och resursanvändning)  
från berörda verksamhetschefer och ansvariga forskare**

**Monika Samuelsson, leg. Arbetsterapeut, Med dr. Verksamhetschef vid  
Arbetsterapikliniken, Karolinska universitetssjukhuset**

**Monika Samuelsson**  
Verksamhetschef  
Arbetsterapikliniken  
Karolinska Universitetssjukhuset

090416 Solna

Monika Samuelsson

Datum, ort

Underskrift

Namnförtydligande

1  
2 Etikansökan  
3  
4  
5  
6

Bilaga 9

7 **Intyg om projektets genomförande (ansvar och resursanvändning)**  
8 **från berörda verksamhetschefer och ansvariga forskare**  
9  
10  
11  
12  
13  
14  
15  
16  
17  
1819 **Urban Säfwenberg, Leg. läk, verksamhetschef vid VO Akutsjukvård, Akut- och**  
20 **rehabiliteringsdivisionen, Akademiska sjukhuset**  
21  
22  
23  
24  
2526 23/3 -2009 Uppsala  
27  
28 Datum, ort29   
30 Underskrift31 URBAN SÄFWENBERG  
32 Namnförtydligande  
33  
34  
35  
36  
37  
38  
39  
40  
41  
42  
43  
44  
45  
46  
47  
48  
49  
50  
51  
52  
53  
54  
55  
56  
57  
58  
59  
60



1  
2 Etikansökan  
3  
4  
5  
6

Bilaga 9

7 **Intyg om projektets genomförande (ansvar och resursanvändning)**  
8 **från berörda verksamhetschefer och ansvariga forskare**  
9  
10  
11  
12  
13  
14  
15  
16  
17  
1819 **Carl Molander, Leg. läk, verksamhetschef vid VO Rehabiliteringsmedicin,**  
20 **Neurodivisionen, Akademiska sjukhuset, överläkare, lektor adj. Institutionen för**  
21 **neurovetenskap, Rehabiliteringsmedicin**  
22  
23  
24  
25  
2627  
28 090305  
29 Datum, ort

Uppsala

  
UnderskriftCarl Molander  
Namnförtydligande



# Curriculum vitae

## Lena von Koch

Sektionen för arbetsterapi  
Institutionen för neurobiologi, vårdvetenskap och samhälle  
Fack 23200, Karolinska Institutet,  
141 83 Huddinge  
Tel: +46 8 524 8 35 55, fax: +46 8 34 50 14

### Nuvarande position

Lena von Koch (LvK) är anställd som universitetslektor vid Institutionen för Institutionen för neurobiologi, vårdvetenskap och samhälle. LvK bedriver forskning huvudsakligen i samarbete med Sektionen för neurologi, Huddinge, Institutionen för klinisk neurovetenskap. Lv K är koordinator för forskarutbildningsprogrammet i vård och omsorgsforskning sedan 2007 och studierektor vid Nationella forskarskolan i vård och omsorg sedan januari 2009 och *docent* i hälso- och sjukvårdsforskning vid Karolinska Institutet sedan 2006.

### Utbildning

Sjukgymnastexamen Karolinska Institutet och leg sjukgymnast 1970  
Studier på masternivå Sargent College of Allied Health Professions Boston Univ 1975 - 76  
Universitetsstudier i pedagogik, fysiologi, engelska, adaptationsteorier och biomekanik vid universiteten i Stockholm, Uppsala, Göteborg och vid KI 1973 - 1991  
*Med Dr* i Neuroepidemiologi och hälso- och sjukvårdsforskning;  
Avhandling: Early supported hospital discharge and continued rehabilitation at home after stroke. Karolinska Institutet 7 April 2000.

### Handledning av doktorander

*Huvudhandledare* för två doktorander till disputation för doktorsgrad och för en till licentiatexamen och huvudhandledare till två doktorander under pågående forskarutbildning.  
*Bihandledare* för två doktorander till doktorsgrad och för en till licentiatexamen och bihandledare till tre doktorander under pågående forskarutbildning. Handledare till 9 examinerade magisterprojekt.

### Forskning

LvKs forskningsfält innefattar studier av behov och användande av hälso- och social service och sjukvård för personer med funktionshinder på grund av neurologisk sjukdom. Det innebär dels kartläggande studier med epidemiologisk ansats men även interventionsstudier och studier av vård och rehabiliteringsprocesser från ett multiprofessionellt LvK är medförfattare till 35 publikationer i peer-bedömda vetenskapliga tidskrifter, medförfattare till bokkapitel, och inbjudna reviewartiklar.

### Forskningsanslag

LvK har innehaft forskarassistenttjänst fyra år finansierad av vetenskapsrådet samt varit huvudsökande och medsökande till projekt som finansierats av VR, ALF, NHR och Hjärnfonden för projekt angående stroke och multipel skleros. Internationell har LvK varit sub-contractor i EU finansierade forskningsprojektet "User of Assistive Technology", sub contractor Contract No. IST-2001-37280, together with Trinity College Dublin, Irland.

### Bedömning av andras vetenskapliga arbete

LvK har genomfört granskning av vetenskapliga artiklar insända till Stroke, Clinical Rehabilitation. The Lancet, Acta Neurologica Scandinavica, Lancet Neurology, och Journal of Rehabilitation Medicine. Lv K har genomfört granskning och bedömning av anslagsansökningar vid Karolinska Institutet och för Regionala forskningsrådet Örebro - Uppsala och varit betygsnämndledamot för disputation till doktorsgrad vid Uppsala universitet, och Karolinska Institutet och opponent vid Umeå universitet.



# BMJ Open

## Resource use of health care services one year after stroke: a secondary analysis of a cluster-randomized controlled trial of a client-centred activities of daily living intervention

|                                 |                                                                                                                                                                                                                                                                                                                                                                                                                                                                                                                                                                                                                                                                                                                                                                                                                                                                                                                                                                                                                                                                                                              |
|---------------------------------|--------------------------------------------------------------------------------------------------------------------------------------------------------------------------------------------------------------------------------------------------------------------------------------------------------------------------------------------------------------------------------------------------------------------------------------------------------------------------------------------------------------------------------------------------------------------------------------------------------------------------------------------------------------------------------------------------------------------------------------------------------------------------------------------------------------------------------------------------------------------------------------------------------------------------------------------------------------------------------------------------------------------------------------------------------------------------------------------------------------|
| Journal:                        | <i>BMJ Open</i>                                                                                                                                                                                                                                                                                                                                                                                                                                                                                                                                                                                                                                                                                                                                                                                                                                                                                                                                                                                                                                                                                              |
| Manuscript ID                   | bmjopen-2018-022222.R1                                                                                                                                                                                                                                                                                                                                                                                                                                                                                                                                                                                                                                                                                                                                                                                                                                                                                                                                                                                                                                                                                       |
| Article Type:                   | Research                                                                                                                                                                                                                                                                                                                                                                                                                                                                                                                                                                                                                                                                                                                                                                                                                                                                                                                                                                                                                                                                                                     |
| Date Submitted by the Author:   | 30-Apr-2018                                                                                                                                                                                                                                                                                                                                                                                                                                                                                                                                                                                                                                                                                                                                                                                                                                                                                                                                                                                                                                                                                                  |
| Complete List of Authors:       | Tistad, Malin; Karolinska Institutet, Department of Neurobiology, Care Sciences and Society; Dalarna University, School of Education, Health and Social studies<br>Flink, Maria; Karolinska Institutet, Department of Learning, Informatics, Management and Ethics; Karolinska University Hospital, Function Area Social Work in Health<br>Ytterberg, Charlotte; Karolinska Institutet, Department of Neurobiology, Care Sciences and Society; Karolinska University Hospital, Function Area Occupational Therapy & Physiotherapy<br>Eriksson, Gunilla; Karolinska Institutet, Department of Neurobiology, Care Sciences and Society; Uppsala University, Department of Neuroscience, Rehabilitation Medicine<br>Guidetti, Susanne; Karolinska Institutet, Department of Neurobiology, Care Sciences and Society<br>Tham, Kerstin; Karolinska Institutet, Department of Neurobiology, Care Sciences and Society ; Malmö University, Faculty of Health and Society von Koch, Lena; Karolinska Institutet, Department of Neurobiology, Care Sciences and Society ; Karolinska University Hospital, Theme Neuro |
| <b>Primary Subject Heading</b>: | Health services research                                                                                                                                                                                                                                                                                                                                                                                                                                                                                                                                                                                                                                                                                                                                                                                                                                                                                                                                                                                                                                                                                     |
| Secondary Subject Heading:      | Neurology                                                                                                                                                                                                                                                                                                                                                                                                                                                                                                                                                                                                                                                                                                                                                                                                                                                                                                                                                                                                                                                                                                    |
| Keywords:                       | Stroke < NEUROLOGY, Organisation of health services < HEALTH SERVICES ADMINISTRATION & MANAGEMENT, Rehabilitation medicine < INTERNAL MEDICINE                                                                                                                                                                                                                                                                                                                                                                                                                                                                                                                                                                                                                                                                                                                                                                                                                                                                                                                                                               |
|                                 |                                                                                                                                                                                                                                                                                                                                                                                                                                                                                                                                                                                                                                                                                                                                                                                                                                                                                                                                                                                                                                                                                                              |

SCHOLARONE™  
Manuscripts

1  
2  
3 Resource use of health care services one year after stroke: a secondary  
4 analysis of a cluster-randomized controlled trial of a client-centred  
5 activities of daily living intervention  
6  
7  
8  
9

10 Malin Tistad<sup>1,2,3\*</sup>, Maria Flink<sup>4,5</sup>, Charlotte Ytterberg<sup>6,7</sup>, Gunilla Eriksson<sup>1,8</sup> Susanne  
11 Guidetti<sup>1</sup>, Kerstin Tham<sup>1,9</sup>, Lena von Koch<sup>1,10</sup>  
12  
13  
14

15  
16  
17 Corresponding author: Malin Tistad,  
18

19 Postal address: School of Education, Health and Social Studies, Dalarna University, SE 791  
20 88 Falun, Sweden.  
21

22 E-mail: mti@du.se  
23

24 Telephone: +46 70 726 30 32  
25  
26  
27  
28

29 <sup>1</sup>Division of Occupational Therapy, Department of Neurobiology, Care Sciences and Society  
30 Karolinska Institutet, Huddinge, Sweden  
31

32 <sup>2</sup>School of Education, Health and Social Studies, Dalarna University, Falun, Sweden  
33

34 <sup>3</sup>Department of Rehabilitation and Social Medicine. Physiotherapy. Umeå University, Umeå,  
35 Sweden  
36  
37

38 <sup>4</sup>Function Area Social Work in Health, Karolinska University Hospital, Stockholm, Sweden  
39

40 <sup>5</sup>Department of Learning, Informatics, Management, and Ethics, Karolinska Institutet,  
41 Stockholm, Sweden  
42  
43

44 <sup>6</sup>Division of Physiotherapy, Department of Neurobiology, Care Sciences and Society,  
45 Karolinska Institutet, Huddinge, Sweden.  
46  
47

48 <sup>7</sup>Function Area Occupational Therapy & Physiotherapy, Karolinska University Hospital,  
49 Stockholm, Sweden.  
50

51 <sup>8</sup>Department of Neuroscience, Rehabilitation Medicine, Uppsala University, Uppsala, Sweden  
52

53 <sup>9</sup>Faculty of Health and Society, Malmö University, Malmö, Sweden  
54

55 <sup>10</sup>Theme Neuro, Karolinska University Hospital, Stockholm, Sweden  
56  
57  
58  
59  
60

1  
2  
3  
4  
5 Word count: 3 357  
6  
7  
8  
9  
10  
11  
12  
13  
14  
15  
16  
17  
18  
19  
20  
21  
22  
23  
24  
25  
26  
27  
28  
29  
30  
31  
32  
33  
34  
35  
36  
37  
38  
39  
40  
41  
42  
43  
44  
45  
46  
47  
48  
49  
50  
51  
52  
53  
54  
55  
56  
57  
58  
59  
60

For peer review only

## ABSTRACT

### Objective

The objective of the study was to compare the total use of health care services in the course of the first year after a stroke between participants who, after the acute care, had received occupational therapy as a client-centred activities of daily living (ADL) intervention (CADL) and participants who had received usual ADL interventions (UADL).

### Design

A secondary analysis of a multicentre cluster-randomized controlled trial (RCT).

### Setting

Primary and secondary care in Sweden.

### Participants:

Participants were included if they: 1) had received CADL or UADL in the RCT, either as inpatients in geriatric rehabilitation units or in their own homes, and 2) data could be retrieved about their use of health care services provided by the county council from computerized registers.

### Interventions:

CADL or UADL.

### Outcome measures

Inpatient and outpatient health care in the course of the first year after stroke.

### Results

Participants from seven of the 16 units included in the RCT met the criteria. Participants in the CADL group (n=26) who received geriatric inpatient rehabilitation had a shorter length of hospital stay (p=0.03) than participants in the UADL-group (n=46), and the CADL group with home rehabilitation (n=13) had fewer outpatient contacts (p=0.01) compared to the UADL group (n=25). Multiple regression analyses showed that in four of the models a higher age was associated with a lower use of health care services. The use of health care services was also associated (some of the models) with dependence in ADL, stroke severity and type of rehabilitation received, CADL or UADL.

## Conclusions

The provision of client-centred occupational therapy after stroke did not appear to increase the use of health care services during the first year after stroke.

Key words: health care services, resource utilization,

**Trial registration:** ClinicalTrials.gov NCT01417585

For peer review only

## ARTICLE SUMMARY

### Strengths and limitations of this study

- A major strength is the use of computerized data on the use of health care services as recall bias is eliminated.
- Comparisons were adjusted for other variables than the intervention received, that might influence the resource use of health care services.
- Analyses were performed separately for the two groups of clients – those included at the geriatric rehabilitation ward and those included at units that provided home rehabilitation – as there might be different patterns depending on how the rehabilitation is organized.
- A limitation is that the groups were quite small, and the ability to identify differences that are small but of clinical relevance were limited

## INTRODUCTION

Client-centred care and rehabilitation involve key concepts such as individual autonomy and choice, partnership, therapist and client responsibility as well as enablement<sup>1</sup> and implies that the client is actively involved in defining needs, goals, outcomes and setting priorities<sup>2</sup>.

Client-centred rehabilitation has been suggested to improve outcomes, and satisfaction with care for persons with stroke<sup>3,4</sup> and is often referred to as a measure of high quality care<sup>5,6</sup>. However, persons with chronic conditions in Sweden receive significantly less client-centered care than comparable countries<sup>7</sup> and concerns have been raised that the provision of client-centered care and rehabilitation is resource- and time consuming<sup>8,9</sup>.

In Sweden, the rehabilitation after stroke is organized in chains of care. Following the acute treatment, patients are referred to rehabilitation provided at a specialized level and organized as inpatient rehabilitation and/or outpatient rehabilitation. Further rehabilitation can also be organized by the primary care and provided in the patient's home by specially trained stroke teams, henceforth referred to as home rehabilitation, or as general rehabilitation provided as outpatient care at the primary care clinic. Health care services should, according to the Health and Medical Service Act<sup>10</sup>, be offered based on each individual's needs, and a patient can be referred to one or more of these types of rehabilitation. In addition to individuals' needs, the type of rehabilitation offered is partly dependent on age, as geriatric rehabilitation is offered to people aged 65 and above and medical rehabilitation to people of working age.

The organization with levels of care embeds multiple transitions between different care providers and professionals. Care transition interventions with client-centred approaches targeting the transition between hospital and primary care have been shown to reduce re-hospitalizations and length of stay (LOS) for multiple patient diagnostic groups<sup>11-14</sup>. However, these studies only consider a specific episode of care or care transition and not the total use of health care services. As a shortened LOS and reduced re-hospitalizations could potentially increase the use of, for instance, primary care, it is important to capture the total use of health care services. The present study was conducted in the context of a multicentre cluster-randomized controlled trial of occupational therapy after the acute care in a stroke unit. Occupational therapy, provided as client-centred activities of daily living (ADL) interventions (CADL) was compared to usual ADL interventions (UADL). The aim of the CADL intervention was to decrease dependence on assistance in daily activities and restriction in participation in everyday life. The CADL intervention has previously been described in

1  
2 detail<sup>15</sup> and no differences were found in patient outcomes between CADL and UADL<sup>15 16</sup>  
3 except a difference in caregiver burden in favour of the CADL<sup>17</sup>.  
4  
5

6  
7 The purpose of the present study was to explore the association between the use of health care  
8 services in the course of the first year after stroke and type of occupational therapy  
9 interventions (CADL or UADL) while adjusting for sociodemographics and clinical  
10 characteristics.  
11  
12

## 13 14 **METHODS**

### 15 16 **Design**

17  
18 This study is a secondary analysis of health care use in the context of a multicentre cluster-  
19 randomized controlled trial (RCT) in which an intervention group received CADL and a  
20 control group received UADL<sup>15 16</sup>. Sixteen rehabilitation units in Stockholm, Uppsala and  
21 Gävleborg County Councils in Sweden were asked to participate. The rehabilitation units  
22 were randomly assigned to provide CADL or UADL stratified as 1) geriatric inpatient  
23 rehabilitation (geriatric rehabilitation wards), or 2) home rehabilitation (specially trained  
24 stroke teams providing rehabilitation in patients' homes).  
25  
26  
27  
28  
29

### 30 31 **Participants in the multicentre cluster-randomized trial**

32  
33 Eligible for inclusion in the RCT were people who were: (a) treated for acute stroke in a  
34 stroke unit  $\leq 3$  months after stroke onset, (b) dependent in at least two ADL domains  
35 according to Katz Extended ADL Index<sup>18</sup>, (c) not diagnosed with dementia, (d) able to  
36 understand and follow instructions, and (e) referred for rehabilitation to one of the 16  
37 participating units. A total of 280 participants were included in the original RCT.  
38  
39  
40

### 41 42 **Interventions**

43  
44 The occupational therapists (OTs) who conducted the CADL intervention had participated in  
45 a 5-day workshop<sup>19</sup>. The CADL presented a structure involving nine components<sup>15</sup> for how to  
46 discover and resolve problems faced in daily activities after stroke. Two general strategies  
47 were combined and used by the OTs across the nine components (i.e. during the whole  
48 intervention process) in order to enable change: 1) using the client's lived experience as a  
49 point of departure, and 2) enabling significant experience to be gained from doing valued  
50 daily activities. To facilitate a successful performance of the selected activities, the client, in  
51 collaboration with the OT, identified specific strategies to resolve upcoming difficulties with  
52  
53  
54  
55  
56  
57  
58  
59  
60



1  
2  
3 performance. The participant together with the OT reflected on the specific strategies used  
4 during the CADL intervention in order to facilitate transfer of use of these strategies to future  
5 activities in new daily situations.  
6  
7

8 The UADL interventions varied according to the routines and praxis of the participating  
9 rehabilitation units. The participants in both groups received other rehabilitation services, e.g.  
10 physiotherapy and speech therapy, as needed.  
11  
12

### 13 **Participants in the secondary analysis of the present study**

14  
15  
16 The inclusion criterion for the present study was that all data about the participant's use of  
17 health care services provided by the county council was available in a computerized register.  
18  
19

### 20 **Outcomes**

#### 21 Use of health care services

22  
23  
24 All data regarding the participants' use of healthcare services during the first 12 months after  
25 stroke was collected from Stockholm County Council's computerised database. The LOS at  
26 inpatient care as well as number of contacts with outpatient care was identified.  
27  
28

29  
30  
31 Inpatient care was categorised into LOS at the stroke units, at rehabilitation wards and  
32 recurrent inpatient stays.  
33  
34

35 The outpatient contacts included contacts at a specialized care level and primary care level.  
36 The specialised outpatient care contacts were categorised based on type of department  
37 (neurology department/other departments), health profession (physician/nurse) and type of  
38 contact (visit/telephone). The specialised outpatient rehabilitation contacts were categorised  
39 into visits to a specific rehabilitation professional (occupational therapist, physiotherapist,  
40 speech and language therapist, medical social worker or psychologist) or day-visits at day-  
41 hospital rehabilitation.  
42  
43  
44  
45

46  
47 The contacts with rehabilitation in primary care were categorised into general rehabilitation or  
48 stroke team rehabilitation. The CADL/UADL interventions were provided by these stroke  
49 teams primarily in the participants' homes, but occasionally also in outpatient clinics.  
50

51 Remaining primary care visits were categorised based on health profession (physician/  
52 nurse/assistant nurse) and type of contact.  
53  
54

#### 55 Clinical characteristics

1  
2  
3 Data on participants' sociodemographic and clinical characteristics were collected at baseline  
4 by specially trained data collectors who were blinded to the participants' group belonging.  
5 Characteristics before stroke regarding dependence on assistance in ADL and capacity in  
6 ADL in six activities categorized as "personal-ADL" and four items categorized as  
7 "instrumental-ADL" were collected with the Katz Extended ADL Index<sup>18</sup>. The Katz Extended  
8 ADL Index is presented as a score between 0 and 10 where 10 indicates independence in  
9 personal-ADL and instrumental ADL.  
10  
11  
12  
13

14 The Barthel Index<sup>20</sup> was used to assess capacity in ADL at baseline. The score ranges from 0  
15 to 100, and a higher score indicates a higher level of capacity. The Barthel Index score was  
16 used to categorize the severity of the participants' stroke into mild, moderate or severe<sup>21</sup>.  
17 More details about the data collection is provided in Guidetti et al 2015<sup>16</sup>.  
18  
19  
20  
21

### 22 **Sample size**

23  
24 In the cluster randomized trial power calculations were performed<sup>15</sup> and sample size was  
25 decided based on the primary outcome, the Stroke Impact Scale<sup>22</sup> domain participation. No  
26 power calculation was performed for the outcome use of health services.  
27  
28

### 29 **Blinding**

30  
31 The data collectors were blinded to which type of interventions that was delivered by which  
32 site. Further, during the data analysis of the present study the first and the last authors and the  
33 statistician were blinded to the participants' group belonging.  
34  
35

### 36 **Patient involvement**

37  
38 The design, the intervention, and the choice of outcome measures were based on our previous  
39 studies on the lived experiences of recapturing self-care after stroke<sup>23 24</sup>. However, no patients  
40 were directly involved in the development of research questions, outcome measures, design of  
41 this study, recruitment to, or conduct of the study. Findings from the study will be not be  
42 reported directly to the study participants but we will submit a report of the findings and  
43 conclusions for the patient organisations' newsletters.  
44  
45  
46  
47  
48

### 49 **Statistical methods**

50  
51 All analyses were performed separately for the groups of participants included in the different  
52 strata. In order to assess the comparability of the groups (CADL and UADL), with regard to  
53 sociodemographics and clinical characteristics, the chi-square test was used for categorical  
54  
55  
56  
57  
58  
59  
60

1  
2  
3 data and the Mann-Whitney U test was used for continuous data. The Mann-Whitney U test  
4 was further used for comparisons of the use of health care services between the groups.  
5

6  
7 Multiple linear regression analyses were used in order to explore the association between the  
8 type of occupational therapy ADL intervention received (CADL or UADL) and 1) *initial LOS*  
9 including the initial episode of care i.e. acute stroke unit and inpatient rehabilitation) 2) *total*  
10 *LOS*, including all inpatient care 0–12 months, 3) *outpatient rehabilitation*, including all  
11 contacts with outpatient rehabilitation services 0–12 months and 4) *total outpatient*, including  
12 all contacts with outpatient health care services 0–12 months.  
13  
14  
15

16  
17 Co-variables, known to be associated with the use of health care services<sup>25-27</sup>, included in all  
18 analyses were: age, sex, independence/dependence in ADL before stroke according to the  
19 Katz Extended ADL Index (independent in P-ADL and I-ADL/dependent in P-ADL or I-  
20 ADL/dependent in P-ADL and I-ADL), stroke severity at baseline (mild/moderate) and  
21 capacity in ADL (Barthel Index-score) at baseline. Age was centred on the mean age in the  
22 regression models, where age is included in interaction terms (age\*stroke severity and  
23 age\*group) due to issues of multicollinearity.  
24  
25  
26  
27  
28

29 Significance level was specified at 0.05 and all analyses were performed using Statistica 13.  
30  
31

## 32 **RESULTS**

33  
34 Only the participants cared for in at the seven rehabilitation units in Stockholm County  
35 Council fulfilled this criterion and 111 participants were included in the secondary analysis.  
36 One had an incorrect identification number and data on health care use could not be retrieved.  
37 Out of the remaining 110 persons, 72 were included on geriatric rehabilitation wards and 38  
38 participants were included in units that provided home rehabilitation. Among those included  
39 in geriatric rehabilitation units, 26 received the CADL intervention (the geriatric CADL  
40 group) and 46 received UADL (the geriatric UADL group). Among those included in home  
41 rehabilitation, 13 received the CADL intervention (the home CADL group) and 25 received  
42 UADL (the home UADL group).  
43  
44  
45  
46  
47  
48  
49

### 50 **Sociodemographics and clinical characteristics**

51  
52 As shown in Table 1, the geriatric CADL group was older than the geriatric UADL group  
53 (median 77.5 vs 68,  $p<0.001$ ) and had a lower Barthel Index score at baseline (median 52.5 vs  
54 65,  $p=0.05$ ). The home CADL group was to a larger extent dependent in ADL before stroke  
55  
56  
57  
58  
59  
60

1  
2  
3  
4  
5  
6  
7  
8  
9  
10  
11  
12  
13  
14  
15  
16  
17  
18  
19  
20  
21  
22  
23  
24  
25  
26  
27  
28  
29  
30  
31  
32  
33  
34  
35  
36  
37  
38  
39  
40  
41  
42  
43  
44  
45  
46  
47  
48  
49  
50  
51  
52  
53  
54  
55  
56  
57  
58  
59  
60

compared to the home UADL group (dependent in personal-ADL and instrumental-ADL, n=3 vs 0/dependent in personal-ADL or instrumental-ADL, n=3 vs 7/independent, n=7 vs 18, p=0.04) (Table 2).

For peer review only

Table 1. Sociodemographics and clinical characteristics before stroke and at baseline for the geriatric rehabilitation groups

|                                                                                          | Geriatric CADL group<br>n=26 | Geriatric UADL<br>group n=46 | p-value |
|------------------------------------------------------------------------------------------|------------------------------|------------------------------|---------|
| Age (years) median/mean (min-max)                                                        | 77.5/77.5 (66-89)            | 68/67.4 (39-89)              | <0.001  |
| Sex: male/female (n)                                                                     | 16/10                        | 28/18                        | 0.95    |
| Civil status: living together/living alone (n)                                           | 14/12                        | 28/18                        | 0.56    |
| Education: nine years or less/more than nine years (n)                                   | 10/16                        | 19/27                        | 0.81    |
| <b>Before stroke</b>                                                                     |                              |                              |         |
| Katz Extended Index of ADL median (IQR)                                                  | 10 (8-10)                    | 10 (9-10)                    | 0.46    |
| Dependence in ADL*: dependent in P-ADL and I-ADL/dependent in P-ADL or I-ADL/independent | 5/4/17                       | 2/12/32                      | 0.10    |
| <b>At inclusion in study</b>                                                             |                              |                              |         |
| Stroke severity mild/moderate/severe                                                     | 15/10/1                      | 35/11/0                      | 0.15    |
| Barthel Index median (IQR)                                                               | 52.5 (45-65)                 | 65 (50-90)                   | 0.05    |

\* based on Katz Extended Index of ADL

Table 2. Sociodemographics and clinical characteristics before stroke and at baseline for the home rehabilitation groups

|                                                                                          | Home CADL group<br>n=13 | Home UADL<br>groupn=25 | p-value |
|------------------------------------------------------------------------------------------|-------------------------|------------------------|---------|
| Age (years) median/mean/ (min-max)                                                       | 77/75 (60-84)           | 70/71 (52-86)          | 0.2     |
| Sex: male/female (n)                                                                     | 7/6                     | 15/10                  | 0.71    |
| Civil status: Living together/living alone (n)                                           | 6/7                     | 14/11                  | 0.56    |
| Education: nine year or less/more than nine year (n)                                     | 5/8                     | 12/13                  | 0.57    |
| <b>Before stroke</b>                                                                     |                         |                        |         |
| Katz Extended Index of ADL median (IQR)                                                  | 10 (7-10)               | 10 (9-10)              | 0.26    |
| Dependence in ADL*: dependent in P-ADL and I-ADL/dependent in P-ADL or I-ADL/independent | 3/3/7                   | 0/7/18                 | 0.04    |
| <b>At inclusion in study</b>                                                             |                         |                        |         |
| Stroke severity mild/moderate/severe                                                     | 11/2/0                  | 24/1/0                 | 0.47    |
| Barthel Index median (IQR)                                                               | 85 (60-90)              | 85 (75-95)             | 0.53    |

\* based on Katz Extended Index of ADL

### Use of health care services

The geriatric CADL group had a shorter LOS at the geriatric rehabilitation unit compared to the geriatric UADL group (median 22.5 days vs 31 days,  $p=0.02$ ), and also a shorter total initial LOS including both the acute stroke unit and the geriatric rehabilitation wards (median 26.5 days vs 36 days,  $p=0.03$ ) (Table 3). In primary care, the geriatric CADL group had more contacts with a physician compared to the geriatric UADL group (median 9.5 contacts vs 7 contacts,  $p=0.02$ ).

The home CADL group had fewer visits to the general outpatient rehabilitation in primary care compared to the home UADL group (median 0 vs 2,  $p=0.04$ ) and, moreover, fewer rehabilitation contacts in primary care when all contacts, including also the contacts with the stroke team, were summed up (median 42 vs 53,  $p=0.03$ ) (Table 4). When all contacts with outpatient care, including both specialized and primary care were totalled, the home CADL group had fewer contacts compared to the home UADL group (median 74 vs 103,  $p=0.01$ ).

Table 3. Use of health care services the first year after stroke for the geriatric CADL group and the geriatric UADL group

|                                                                           | Geriatric CADL group, n=26 |      |        |      |         | Geriatric UADL group, n=46 |      |        |      |         | p-value     |
|---------------------------------------------------------------------------|----------------------------|------|--------|------|---------|----------------------------|------|--------|------|---------|-------------|
|                                                                           | n*                         | Mean | Median | Sum  | Min-max | n*                         | Mean | Median | Sum  | Min-max |             |
| <b>Emergency unit (visits)</b>                                            | 25                         | 1.8  | 1.5    | 48   | 0-5     | 45                         | 2.2  | 2,0    | 100  | 0-12    | 0.71        |
| <b>INPATIENT CARE</b>                                                     |                            |      |        |      |         |                            |      |        |      |         |             |
| <b>Initial hospitalisation (days)</b>                                     |                            |      |        |      |         |                            |      |        |      |         |             |
| Acute stroke unit                                                         | 26                         | 5.8  | 6.0    | 152  | 0-10    | 46                         | 9.1  | 5,0    | 421  | 0-60    | 0.65        |
| Inpatient rehabilitation                                                  | 26                         | 26.6 | 22.5   | 691  | 12-64   | 46                         | 33.9 | 31.0   | 1560 | 10-71   | <b>0.02</b> |
| <i>Initial stay (i.e. acute stroke unit and inpatient rehabilitation)</i> | 26                         | 32.4 | 26.5   | 843  | 17-73   | 46                         | 43.1 | 36.0   | 1981 | 13-114  | <b>0.03</b> |
| <b>Recurrent hospitalisation</b>                                          |                            |      |        |      |         |                            |      |        |      |         |             |
| Inpatient care                                                            | 8                          | 4.7  | 0      | 122  | 0-59    | 23                         | 7.5  | 0.5    | 344  | 0-70    | 0.53        |
| Inpatient rehabilitation                                                  | 3                          | 2.6  | 0      | 68   | 0-32    | 7                          | 3.4  | 0      | 155  | 0-49    | 0.80        |
| <b><i>Inpatient care, total</i></b>                                       | 26                         | 39.7 | 29.5   | 1033 | 17-123  | 46                         | 53.9 | 40.0   | 2480 | 13-156  | <b>0.02</b> |
| <b>OUTPATIENT CARE</b>                                                    |                            |      |        |      |         |                            |      |        |      |         |             |
| <b>Specialised outpatient care</b>                                        |                            |      |        |      |         |                            |      |        |      |         |             |
| Physician, visit                                                          |                            |      |        |      |         |                            |      |        |      |         |             |



1  
2  
3  
4  
5  
6  
7  
8  
9  
10  
11  
12  
13  
14  
15  
16  
17  
18  
19  
20  
21  
22  
23  
24  
25  
26  
27  
28  
29  
30  
31  
32  
33  
34  
35  
36  
37  
38  
39  
40  
41  
42  
43  
44  
45  
46  
47

|                                              |    |      |     |    |     |    |      |     |     |       |              |
|----------------------------------------------|----|------|-----|----|-----|----|------|-----|-----|-------|--------------|
| Neurology department                         | 17 | 0.7  | 1.0 | 18 | 0-2 | 9  | 0.3  | 0   | 12  | 0-2   | <b>0.003</b> |
| Other departments                            | 22 | 2.3  | 1.5 | 59 | 0-7 | 39 | 4.6  | 2.0 | 214 | 0-49  | 0.19         |
| <b>Physician, telephone</b>                  |    |      |     |    |     |    |      |     |     |       |              |
| Neurology department                         | 2  | 0.1  | 0   | 2  | 0-1 | 2  | 0.1  | 0   | 4   | 0-3   | 0.83         |
| Other departments                            | 2  | 0.1  | 0   | 3  | 0-2 | 3  | 0.1  | 0   | 5   | 0-3   | 0.94         |
| <b>Nurse, visit</b>                          |    |      |     |    |     |    |      |     |     |       |              |
| Neurology department                         | 8  | 0.4  | 0   | 11 | 0-3 | 1  | 0.02 | 0   | 1   | 0-1   | <b>0.04</b>  |
| Other departments                            | 14 | 1.0  | 1.0 | 25 | 0-8 | 15 | 1.5  | 0   | 69  | 0-14  | 0.35         |
| <b>Nurse, telephone</b>                      |    |      |     |    |     |    |      |     |     |       |              |
| Neurology department                         | 1  | 0.04 | 0   | 1  | 0-1 | 2  | 0.04 | 0   | 2   | 0-1   | 0.98         |
| Other departments                            | 1  | 0.04 | 0   | 1  | 0-1 | 1  | 0.06 | 0   | 3   | 0-3   | 0.91         |
| Other                                        | 6  | 0.6  | 0   | 15 | 0-6 | 14 | 0.9  | 0   | 43  | 0-7   | 0.55         |
| <b>Specialised outpatient rehabilitation</b> |    |      |     |    |     |    |      |     |     |       |              |
| Rehabilitation professionals (visit)         | 0  |      |     |    |     | 13 | 18.3 | 0   | 842 | 0-187 |              |
| Day-hospital rehabilitation (day-visit)      | 0  |      |     |    |     | 8  | 3.2  | 0   | 146 | 0-28  |              |
| <b>Primary care</b>                          |    |      |     |    |     |    |      |     |     |       |              |
| Rehabilitation                               |    |      |     |    |     |    |      |     |     |       |              |

|    |                                     |    |      |      |     |      |    |      |      |      |       |             |
|----|-------------------------------------|----|------|------|-----|------|----|------|------|------|-------|-------------|
| 1  |                                     |    |      |      |     |      |    |      |      |      |       |             |
| 2  |                                     |    |      |      |     |      |    |      |      |      |       |             |
| 3  |                                     |    |      |      |     |      |    |      |      |      |       |             |
| 4  |                                     |    |      |      |     |      |    |      |      |      |       |             |
| 5  | General rehabilitation , visit      | 12 | 3.8  | 0    | 100 | 0-31 | 19 | 7.6  | 0    | 350  | 0-70  | 0.99        |
| 6  | General rehabilitation, home-visit  | 7  | 0.8  | 0    | 22  | 0-12 | 12 | 0.8  | 0    | 35   | 0-9   | 0.97        |
| 7  | General rehabilitation, telephone   | 2  | 0.08 | 0    | 2   | 0-1  | 7  | 0.3  | 0    | 12   | 0-3   | 0.57        |
| 8  | General rehabilitation, group visit | 8  | 3.5  | 0    | 91  | 0-19 | 12 | 4.7  | 0    | 216  | 0-67  | 0.75        |
| 9  | Stroke team, visits                 | 1  | 0.8  | 0    | 21  | 0-21 | 10 | 3.6  | 0    | 164  | 0-61  | 0.22        |
| 10 | Stroke team, home visit             | 23 | 21.2 | 15.5 | 550 | 0-87 | 34 | 22.5 | 16.0 | 1036 | 0-89  | 0.82        |
| 11 | Stroke team, telephone              | 1  | 0.2  | 0    | 4   | 0-4  | 12 | 0.4  | 0    | 17   | 0-10  | 0.75        |
| 12 | Stroke team, group                  | 1  | 0.04 | 0    | 1   | 0-1  | 4  | 3.3  | 0    | 151  | 0-90  | 0.72        |
| 13 | <i>Rehabilitation, total</i>        | 23 | 30.4 | 22.5 | 791 | 0-98 | 37 | 43.1 | 26.5 | 1981 | 0-185 | 0.62        |
| 14 | Physician                           |    |      |      |     |      |    |      |      |      |       |             |
| 15 | Visit                               | 23 | 12.8 | 6.0  | 333 | 0-50 | 42 | 7.7  | 4.0  | 355  | 0-32  | 0.16        |
| 16 | Home visit                          | 12 | 2.0  | 0    | 51  | 0-10 | 12 | 1.2  | 0    | 56   | 0-16  | 0.15        |
| 17 | Stroke team                         | 0  |      |      |     |      | 0  |      |      |      |       |             |
| 18 | Telephone                           | 18 | 2.5  | 2.0  | 65  | 0-15 | 25 | 1.6  | 1.0  | 76   | 0-13  | 0.17        |
| 19 | <i>Physician, total</i>             | 25 | 17.3 | 9.5  | 449 | 0-58 | 43 | 10.6 | 7.0  | 487  | 0-34  | <b>0.03</b> |
| 20 | Nurse                               |    |      |      |     |      |    |      |      |      |       |             |
| 21 | Visit                               | 13 | 3.0  | 0.5  | 79  | 0-24 | 22 | 3.5  | 0    | 162  | 0-85  | 0.76        |
| 22 | Home visit                          | 12 | 9.0  | 0    | 233 | 0-38 | 17 | 6.9  | 0    | 316  | 0-41  | 0.49        |
| 23 |                                     |    |      |      |     |      |    |      |      |      |       |             |
| 24 |                                     |    |      |      |     |      |    |      |      |      |       |             |
| 25 |                                     |    |      |      |     |      |    |      |      |      |       |             |
| 26 |                                     |    |      |      |     |      |    |      |      |      |       |             |
| 27 |                                     |    |      |      |     |      |    |      |      |      |       |             |
| 28 |                                     |    |      |      |     |      |    |      |      |      |       |             |
| 29 |                                     |    |      |      |     |      |    |      |      |      |       |             |
| 30 |                                     |    |      |      |     |      |    |      |      |      |       |             |
| 31 |                                     |    |      |      |     |      |    |      |      |      |       |             |
| 32 |                                     |    |      |      |     |      |    |      |      |      |       |             |
| 33 |                                     |    |      |      |     |      |    |      |      |      |       |             |
| 34 |                                     |    |      |      |     |      |    |      |      |      |       |             |
| 35 |                                     |    |      |      |     |      |    |      |      |      |       |             |
| 36 |                                     |    |      |      |     |      |    |      |      |      |       |             |
| 37 |                                     |    |      |      |     |      |    |      |      |      |       |             |
| 38 |                                     |    |      |      |     |      |    |      |      |      |       |             |
| 39 |                                     |    |      |      |     |      |    |      |      |      |       |             |
| 40 |                                     |    |      |      |     |      |    |      |      |      |       |             |
| 41 |                                     |    |      |      |     |      |    |      |      |      |       |             |
| 42 |                                     |    |      |      |     |      |    |      |      |      |       |             |
| 43 |                                     |    |      |      |     |      |    |      |      |      |       |             |
| 44 |                                     |    |      |      |     |      |    |      |      |      |       |             |
| 45 |                                     |    |      |      |     |      |    |      |      |      |       |             |
| 46 |                                     |    |      |      |     |      |    |      |      |      |       |             |
| 47 |                                     |    |      |      |     |      |    |      |      |      |       |             |

|                                      |                  |                    |                    |                    |                     |                  |                    |                    |                    |                     |                    |
|--------------------------------------|------------------|--------------------|--------------------|--------------------|---------------------|------------------|--------------------|--------------------|--------------------|---------------------|--------------------|
| Stroke team                          | 0                |                    |                    |                    |                     | 0                |                    |                    |                    |                     |                    |
| Telephone                            | 3                | 0.3                | 0                  | 8                  | 0-4                 | 4                | 0.1                | 0                  | 5                  | 0-2                 | 0.81               |
| Group                                | 0                |                    |                    |                    |                     | 0                |                    |                    |                    |                     |                    |
| <i>Nurse, total</i>                  | <i>17</i>        | <i>12.3</i>        | <i>4</i>           | <i>320</i>         | <i>0-48</i>         | <i>32</i>        | <i>10.5</i>        | <i>3.0</i>         | <i>483</i>         | <i>0-116</i>        | <i>0.62</i>        |
| Assistant nurse                      |                  |                    |                    |                    |                     |                  |                    |                    |                    |                     |                    |
| Visit                                | 2                | 0.08               | 0                  | 2                  | 0-1                 | 4                | 0.3                | 0                  | 12                 | 0-7                 | 0.93               |
| Home visit                           | 4                | 4.1                | 0                  | 107                | 0-103               | 12               | 4.9                | 0                  | 226                | 0-134               | 0.40               |
| Group                                | 0                |                    |                    |                    |                     | 1                | 0.1                | 0                  | 4                  | 0-4                 |                    |
| <i>Assistant nurse, total</i>        | <i>4</i>         | <i>4.2</i>         | <i>0</i>           | <i>109</i>         | <i>0-104</i>        | <i>16</i>        | <i>5.3</i>         | <i>0</i>           | <i>242</i>         | <i>0-134</i>        | <i>0.14</i>        |
| <b><i>Outpatient care, total</i></b> | <b><i>26</i></b> | <b><i>69.4</i></b> | <b><i>65.5</i></b> | <b><i>1804</i></b> | <b><i>1-185</i></b> | <b><i>46</i></b> | <b><i>98.6</i></b> | <b><i>74.0</i></b> | <b><i>4534</i></b> | <b><i>2-316</i></b> | <b><i>0.34</i></b> |

n\* number of people who have used the service

Table 4. Use of health care services the first year after stroke for the home CADL group and the home UADL group

|                                | Home CADL group, n=13 |      |        |     |         | Home UADL group n=25 |      |        |     |         |         |
|--------------------------------|-----------------------|------|--------|-----|---------|----------------------|------|--------|-----|---------|---------|
|                                | n*                    | Mean | Median | Sum | Min-max | n*                   | Mean | Median | Sum | Min-max | p-value |
| <b>Emergency unit (visits)</b> | 13                    | 2.1  | 2,0    | 27  | 1-5     | 24                   | 2    | 2.0    | 50  | 0-5     | 0.70    |

**INPATIENT CARE (days)**

**Initial hospitalisation**

|                                                                     |           |             |             |            |             |           |             |             |            |             |             |
|---------------------------------------------------------------------|-----------|-------------|-------------|------------|-------------|-----------|-------------|-------------|------------|-------------|-------------|
| Acute stroke unit                                                   | 13        | 7.7         | 6.0         | 100        | 2-15        | 25        | 9.4         | 9.0         | 235        | 0-26        | 0.54        |
| Inpatient rehabilitation                                            | 12        | 16.0        | 20.0        | 208        | 0-26        | 16        | 15.4        | 13.0        | 385        | 0-50        | 0.51        |
| <i>Initial stay (i.e. stroke unit and inpatient rehabilitation)</i> | <i>13</i> | <i>23.7</i> | <i>27.0</i> | <i>308</i> | <i>4-35</i> | <i>25</i> | <i>24.8</i> | <i>26.0</i> | <i>620</i> | <i>2-55</i> | <i>0.95</i> |

**Recurrent hospitalisation**

|                              |           |             |             |            |             |           |             |             |            |              |             |
|------------------------------|-----------|-------------|-------------|------------|-------------|-----------|-------------|-------------|------------|--------------|-------------|
| Inpatient care               | 4         | 1.8         | 0           | 23         | 0-17        | 9         | 4.8         | 0           | 120        | 0-79         | 0.72        |
| Inpatient rehabilitation     | 0         |             |             |            |             | 2         | 0.7         | 0           | 17         | 0-10         | 0.70        |
| <i>Inpatient care, total</i> | <i>13</i> | <i>25.5</i> | <i>28.0</i> | <i>331</i> | <i>4-45</i> | <i>25</i> | <i>30.3</i> | <i>29.0</i> | <i>757</i> | <i>2-134</i> | <i>0.70</i> |

**OUTPATIENT CARE (contacts)****Specialised outpatient care**

## Physician, visit

|                      |    |     |     |    |      |    |     |     |     |      |      |
|----------------------|----|-----|-----|----|------|----|-----|-----|-----|------|------|
| Neurology department | 5  | 0.4 | 0   | 5  | 0-1  | 5  | 0.3 | 0   | 7   | 0-2  | 0.45 |
| Other departments    | 10 | 2.3 | 2.0 | 30 | 0-10 | 21 | 5.6 | 2.0 | 139 | 0-48 | 0.52 |

## Physician, telephone

|                      |   |     |   |   |     |   |     |   |    |     |      |
|----------------------|---|-----|---|---|-----|---|-----|---|----|-----|------|
| Neurology department | 2 | 0.2 | 0 | 2 | 0-1 | 1 | 0.4 | 0 | 1  | 0-1 | 0.58 |
| Other departments    | 3 | 0.2 | 0 | 3 | 0-1 | 9 | 0.6 | 0 | 16 | 0-4 | 0.41 |

## Nurse, visit

|    |                                              |    |      |      |     |      |    |      |      |     |       |      |
|----|----------------------------------------------|----|------|------|-----|------|----|------|------|-----|-------|------|
| 1  |                                              |    |      |      |     |      |    |      |      |     |       |      |
| 2  |                                              |    |      |      |     |      |    |      |      |     |       |      |
| 3  |                                              |    |      |      |     |      |    |      |      |     |       |      |
| 4  |                                              |    |      |      |     |      |    |      |      |     |       |      |
| 5  | Neurology department                         | 1  | 0.1  | 0    | 1   | 0-1  | 1  | 0.6  | 0    | 15  | 0-15  | 0.88 |
| 6  | Other departments                            | 5  | 0.4  | 0    | 5   | 0-1  | 11 | 1.2  | 0    | 31  | 0-9   | 0.47 |
| 7  |                                              |    |      |      |     |      |    |      |      |     |       |      |
| 8  | Nurse, telephone                             |    |      |      |     |      |    |      |      |     |       |      |
| 9  |                                              |    |      |      |     |      |    |      |      |     |       |      |
| 10 | Neurology department                         | 0  |      |      |     |      | 1  | 1.2  | 0    | 29  | 0-29  |      |
| 11 | Other departments                            | 1  | 0.1  | 0    | 1   | 0-1  | 6  | 0.4  | 0    | 10  | 0-3   | 0.40 |
| 12 |                                              |    |      |      |     |      |    |      |      |     |       |      |
| 13 | Other                                        | 3  | 1.6  | 0    | 21  | 0-8  | 9  | 0.9  | 0    | 23  | 0-6   | 0.81 |
| 14 |                                              |    |      |      |     |      |    |      |      |     |       |      |
| 15 |                                              |    |      |      |     |      |    |      |      |     |       |      |
| 16 | <b>Specialised outpatient rehabilitation</b> |    |      |      |     |      |    |      |      |     |       |      |
| 17 |                                              |    |      |      |     |      |    |      |      |     |       |      |
| 18 | Rehabilitation professional (visit)          | 0  |      |      |     |      | 8  | 26.0 | 7.0  | 649 | 0-126 |      |
| 19 | Day-hospital rehabilitation (day-visit)      | 0  |      |      |     |      | 0  |      |      |     |       |      |
| 20 |                                              |    |      |      |     |      |    |      |      |     |       |      |
| 21 |                                              |    |      |      |     |      |    |      |      |     |       |      |
| 22 |                                              |    |      |      |     |      |    |      |      |     |       |      |
| 23 | <b>Primary care</b>                          |    |      |      |     |      |    |      |      |     |       |      |
| 24 |                                              |    |      |      |     |      |    |      |      |     |       |      |
| 25 | Rehabilitation                               |    |      |      |     |      |    |      |      |     |       |      |
| 26 |                                              |    |      |      |     |      |    |      |      |     |       |      |
| 27 | General rehabilitation, visits to clinic     | 6  | 1.8  | 0    | 24  | 0-13 | 18 | 8.0  | 2.0  | 200 | 0-41  | 0.04 |
| 28 |                                              |    |      |      |     |      |    |      |      |     |       |      |
| 29 | General rehabilitation, home-visits          | 3  | 0.6  | 0    | 8   | 0-5  | 7  | 2.0  | 0    | 50  | 0-20  | 0.68 |
| 30 |                                              |    |      |      |     |      |    |      |      |     |       |      |
| 31 | General rehabilitation, telephone            | 3  | 0.3  | 0    | 4   | 0-2  | 10 | 0.9  | 0    | 22  | 0-3   | 0.27 |
| 32 |                                              |    |      |      |     |      |    |      |      |     |       |      |
| 33 | General rehabilitation, group visit          | 2  | 2.1  | 0    | 28  | 0-20 | 14 | 10.0 | 1.0  | 249 | 0-102 | 0.05 |
| 34 |                                              |    |      |      |     |      |    |      |      |     |       |      |
| 35 | Stroke team, visits to clinic                | 5  | 3.7  | 0    | 48  | 0-23 | 1  | 0.1  | 0    | 1   | 0-1   | 0.08 |
| 36 |                                              |    |      |      |     |      |    |      |      |     |       |      |
| 37 | Stroke team, home-visits                     | 13 | 23.6 | 13,0 | 307 | 5-62 | 25 | 36.9 | 30.0 | 922 | 5-97  | 0.09 |
| 38 |                                              |    |      |      |     |      |    |      |      |     |       |      |
| 39 |                                              |    |      |      |     |      |    |      |      |     |       |      |
| 40 |                                              |    |      |      |     |      |    |      |      |     |       |      |
| 41 |                                              |    |      |      |     |      |    |      |      |     |       |      |
| 42 |                                              |    |      |      |     |      |    |      |      |     |       |      |
| 43 |                                              |    |      |      |     |      |    |      |      |     |       |      |
| 44 |                                              |    |      |      |     |      |    |      |      |     |       |      |
| 45 |                                              |    |      |      |     |      |    |      |      |     |       |      |
| 46 |                                              |    |      |      |     |      |    |      |      |     |       |      |
| 47 |                                              |    |      |      |     |      |    |      |      |     |       |      |

|    |                              |           |             |             |            |              |           |             |             |             |               |             |
|----|------------------------------|-----------|-------------|-------------|------------|--------------|-----------|-------------|-------------|-------------|---------------|-------------|
| 1  |                              |           |             |             |            |              |           |             |             |             |               |             |
| 2  |                              |           |             |             |            |              |           |             |             |             |               |             |
| 3  |                              |           |             |             |            |              |           |             |             |             |               |             |
| 4  |                              |           |             |             |            |              |           |             |             |             |               |             |
| 5  | Stroke team, telephone       | 5         | 2.6         | 0           | 34         | 0-16         | 0         |             |             |             |               |             |
| 6  |                              |           |             |             |            |              |           |             |             |             |               |             |
| 7  | Stroke team, group visit     | 1         | 0.5         | 0           | 6          | 0-6          | 8         | 0.8         | 0           | 20          | 0-4           | 0.28        |
| 8  |                              |           |             |             |            |              |           |             |             |             |               |             |
| 9  | <i>Rehabilitation, total</i> | <i>13</i> | <i>35.3</i> | <i>42.0</i> | <i>459</i> | <i>7-63</i>  | <i>25</i> | <i>58.6</i> | <i>53.0</i> | <i>1464</i> | <i>13-129</i> | <i>0.03</i> |
| 10 |                              |           |             |             |            |              |           |             |             |             |               |             |
| 11 | Physician                    |           |             |             |            |              |           |             |             |             |               |             |
| 12 |                              |           |             |             |            |              |           |             |             |             |               |             |
| 13 | Visit to clinic              | 13        | 10.9        | 7.0         | 142        | 1-26         | 22        | 5.7         | 4.0         | 142         | 0-23          | 0.07        |
| 14 |                              |           |             |             |            |              |           |             |             |             |               |             |
| 15 | Home visit                   | 4         | 1.1         | 0           | 14         | 0-7          | 6         | 1.4         | 0           | 34          | 0-9           | 0.86        |
| 16 |                              |           |             |             |            |              |           |             |             |             |               |             |
| 17 | Stroke team                  | 0         |             |             |            |              | 1         | 0.1         | 0           | 1           | 0-1           |             |
| 18 |                              |           |             |             |            |              |           |             |             |             |               |             |
| 19 | Telephone                    | 10        | 2.9         | 2.0         | 38         | 0-10         | 14        | 1.5         | 1.0         | 37          | 0-5           | 0.13        |
| 20 |                              |           |             |             |            |              |           |             |             |             |               |             |
| 21 | <i>Physician, total</i>      | <i>13</i> | <i>14.9</i> | <i>10.0</i> | <i>194</i> | <i>2-31</i>  | <i>24</i> | <i>8.6</i>  | <i>7.0</i>  | <i>214</i>  | <i>0-24</i>   | <i>0.06</i> |
| 22 |                              |           |             |             |            |              |           |             |             |             |               |             |
| 23 | Nurse                        |           |             |             |            |              |           |             |             |             |               |             |
| 24 |                              |           |             |             |            |              |           |             |             |             |               |             |
| 25 | Visit to clinic              | 9         | 3.4         | 3.0         | 44         | 0-12         | 12        | 1.2         | 0           | 30          | 0-7           | 0.06        |
| 26 |                              |           |             |             |            |              |           |             |             |             |               |             |
| 27 | Home visits                  | 8         | 11.6        | 1.0         | 151        | 0-112        | 10        | 28.6        | 0           | 716         | 0-447         | 0.67        |
| 28 |                              |           |             |             |            |              |           |             |             |             |               |             |
| 29 | Stroke team                  | 3         | 0.4         | 0           | 5          | 0-2          |           |             |             |             |               |             |
| 30 |                              |           |             |             |            |              |           |             |             |             |               |             |
| 31 | Telephone                    | 4         | 0.4         | 0           | 5          | 0-2          | 2         | 0.1         | 0           | 2           | 0-1           | 0.25        |
| 32 |                              |           |             |             |            |              |           |             |             |             |               |             |
| 33 | Stroke team telephone        | 1         | 0.1         | 0           | 1          | 0            |           |             |             |             |               |             |
| 34 |                              |           |             |             |            |              |           |             |             |             |               |             |
| 35 | Group                        | 0         |             |             |            |              | 2         | 0.1         | 0           | 3           | 0-2           |             |
| 36 |                              |           |             |             |            |              |           |             |             |             |               |             |
| 37 | <i>Nurse, total</i>          | <i>13</i> | <i>15.8</i> | <i>6.0</i>  | <i>206</i> | <i>1-115</i> | <i>18</i> | <i>30.0</i> | <i>3.0</i>  | <i>751</i>  | <i>0-447</i>  | <i>0.19</i> |
| 38 |                              |           |             |             |            |              |           |             |             |             |               |             |
| 39 | Assistant nurse              |           |             |             |            |              |           |             |             |             |               |             |
| 40 |                              |           |             |             |            |              |           |             |             |             |               |             |
| 41 |                              |           |             |             |            |              |           |             |             |             |               |             |
| 42 |                              |           |             |             |            |              |           |             |             |             |               |             |
| 43 |                              |           |             |             |            |              |           |             |             |             |               |             |
| 44 |                              |           |             |             |            |              |           |             |             |             |               |             |
| 45 |                              |           |             |             |            |              |           |             |             |             |               |             |
| 46 |                              |           |             |             |            |              |           |             |             |             |               |             |
| 47 |                              |           |             |             |            |              |           |             |             |             |               |             |

|    |                                                 |           |             |             |            |               |           |              |              |             |               |             |
|----|-------------------------------------------------|-----------|-------------|-------------|------------|---------------|-----------|--------------|--------------|-------------|---------------|-------------|
| 1  |                                                 |           |             |             |            |               |           |              |              |             |               |             |
| 2  |                                                 |           |             |             |            |               |           |              |              |             |               |             |
| 3  |                                                 |           |             |             |            |               |           |              |              |             |               |             |
| 4  |                                                 |           |             |             |            |               |           |              |              |             |               |             |
| 5  | Visit to clinic                                 | 0         | 0           | 0           | 0          | 0             | 2         | 0.1          | 0            | 3           | 0-2           | 0.7         |
| 6  | Home visit                                      | 4         | 3.3         | 0           | 43         | 0-23          | 4         | 5.3          | 0            | 132         | 0-103         | 0.49        |
| 7  | Group visit                                     | 0         |             |             |            |               | 0         |              |              |             |               |             |
| 8  |                                                 |           |             |             |            |               |           |              |              |             |               |             |
| 9  | Assistant nurse, total                          | 4         | 3.3         | 0           | 43         | 0-23          | 6         | 5.4          | 0            | 135         | 0-103         | 0.68        |
| 10 |                                                 |           |             |             |            |               |           |              |              |             |               |             |
| 11 | <b>Outpatient care, total</b>                   | <b>13</b> | <b>74.6</b> | <b>74.0</b> | <b>970</b> | <b>11-208</b> | <b>25</b> | <b>139.4</b> | <b>103.0</b> | <b>3484</b> | <b>18-668</b> | <b>0.01</b> |
| 12 |                                                 |           |             |             |            |               |           |              |              |             |               |             |
| 13 |                                                 |           |             |             |            |               |           |              |              |             |               |             |
| 14 |                                                 |           |             |             |            |               |           |              |              |             |               |             |
| 15 | *number of people who have received the service |           |             |             |            |               |           |              |              |             |               |             |
| 16 |                                                 |           |             |             |            |               |           |              |              |             |               |             |
| 17 |                                                 |           |             |             |            |               |           |              |              |             |               |             |
| 18 |                                                 |           |             |             |            |               |           |              |              |             |               |             |
| 19 |                                                 |           |             |             |            |               |           |              |              |             |               |             |
| 20 |                                                 |           |             |             |            |               |           |              |              |             |               |             |
| 21 |                                                 |           |             |             |            |               |           |              |              |             |               |             |
| 22 |                                                 |           |             |             |            |               |           |              |              |             |               |             |
| 23 |                                                 |           |             |             |            |               |           |              |              |             |               |             |
| 24 |                                                 |           |             |             |            |               |           |              |              |             |               |             |
| 25 |                                                 |           |             |             |            |               |           |              |              |             |               |             |
| 26 |                                                 |           |             |             |            |               |           |              |              |             |               |             |
| 27 |                                                 |           |             |             |            |               |           |              |              |             |               |             |
| 28 |                                                 |           |             |             |            |               |           |              |              |             |               |             |
| 29 |                                                 |           |             |             |            |               |           |              |              |             |               |             |
| 30 |                                                 |           |             |             |            |               |           |              |              |             |               |             |
| 31 |                                                 |           |             |             |            |               |           |              |              |             |               |             |
| 32 |                                                 |           |             |             |            |               |           |              |              |             |               |             |
| 33 |                                                 |           |             |             |            |               |           |              |              |             |               |             |
| 34 |                                                 |           |             |             |            |               |           |              |              |             |               |             |
| 35 |                                                 |           |             |             |            |               |           |              |              |             |               |             |
| 36 |                                                 |           |             |             |            |               |           |              |              |             |               |             |
| 37 |                                                 |           |             |             |            |               |           |              |              |             |               |             |
| 38 |                                                 |           |             |             |            |               |           |              |              |             |               |             |
| 39 |                                                 |           |             |             |            |               |           |              |              |             |               |             |
| 40 |                                                 |           |             |             |            |               |           |              |              |             |               |             |
| 41 |                                                 |           |             |             |            |               |           |              |              |             |               |             |
| 42 |                                                 |           |             |             |            |               |           |              |              |             |               |             |
| 43 |                                                 |           |             |             |            |               |           |              |              |             |               |             |
| 44 |                                                 |           |             |             |            |               |           |              |              |             |               |             |
| 45 |                                                 |           |             |             |            |               |           |              |              |             |               |             |
| 46 |                                                 |           |             |             |            |               |           |              |              |             |               |             |
| 47 |                                                 |           |             |             |            |               |           |              |              |             |               |             |

1  
2  
3  
4  
5  
6  
7 In the geriatric groups, the multiple regression models showed that a higher age and being  
8 female were associated with a shorter initial LOS, whereas a more severe stroke (i.e. a  
9 moderate stroke) was associated with a longer initial LOS (Table 5a). In addition, there was a  
10 significant interaction between age and stroke severity, meaning that the association between  
11 initial LOS and age was different in the stroke severity groups. The association between initial  
12 LOS and age was stronger for participants with moderate stroke compared to milder stroke.  
13 The difference between participants with mild and moderate stroke was dependent on age i.e.  
14 the difference was greater for younger participants compared to older.  
15  
16  
17  
18  
19

20 With regard to inpatient hospital care, i.e. the total LOS during the first year after stroke  
21 (Table 5b), a more severe stroke was associated with a longer LOS, whereas dependence in  
22 both personal-ADL and instrumental-ADL before the stroke was associated with a shorter  
23 LOS. For outpatient rehabilitation and total outpatient contacts, higher age was associated  
24 with fewer contacts (Table 5c, 5d).  
25  
26  
27  
28

29 In the home groups, the multiple regression model showed no associations between the  
30 independent variable or covariates and initial LOS or total LOS. With regard to outpatient  
31 rehabilitation (Table 6a), higher age and a better capacity in ADL according to Barthel Index  
32 at baseline were related to fewer contacts, whereas belonging to the UADL group was  
33 associated with a higher number of contacts.  
34  
35  
36  
37

38 Moreover, an interaction between age and group belonging was also significantly associated  
39 with the number of outpatient rehabilitation contacts, meaning that the association with age  
40 differed between the CADL and UADL groups. In the UADL group, there was a very weak  
41 association between higher age and higher number of contacts, whereas there was an  
42 association between higher age and fewer contacts in the CADL group.  
43  
44  
45  
46

47 For total outpatient care, including both specialized and primary care, belonging to the UADL  
48 group was associated with a higher number of contacts, whereas better capacity in ADL at  
49 baseline and dependence in personal-ADL or instrumental-ADL before the stroke was related  
50 to fewer contacts (Table 6b).  
51  
52  
53  
54  
55  
56  
57  
58  
59  
60



Table 5a. Final regression model for the association between the geriatric rehabilitation group's *initial LOS* (log-transformed), i.e. the initial episode of care including the acute stroke unit and inpatient rehabilitation, and the independent variable and co-variates

|                                     | B <sup>a)</sup> | 95% CI           | p-value |
|-------------------------------------|-----------------|------------------|---------|
| Intercept                           | 3.42            | 3.22, 3.62       | <0.001  |
| Age <sup>b)</sup>                   | -0.01           | -0.02, -0.000006 | 0.05    |
| Groups                              |                 | -0.07, 0.37      |         |
| UADL vs CADL                        | 0.15            |                  | 0.18    |
| Stroke severity <sup>c)</sup>       |                 |                  |         |
| Moderate vs Mild                    | 0.55            | 0.3, 0.79        | <0.001  |
| Sex                                 |                 |                  |         |
| Female vs Male                      | -0.26           | -0.46, -0.05     | 0.01    |
| Age x stroke severity <sup>d)</sup> | -0.03           | -0.06, -0.002    | 0.03    |
| <hr/>                               |                 |                  |         |
| R <sup>2</sup> =0.28                |                 |                  |         |

a) regression coefficient

b) Patients with mild stroke severity

c) B at mean age

d) Patients with moderate severity, B= -0.03+(-0.01)= -0.04

Table 5b. Final regression model for the association between the geriatric rehabilitation group's *total LOS* (log-transformed), including all inpatient care 0–12 months, and the independent variable and co-variates

|                                                                                                                 | B <sup>a)</sup> | 95% CI      | p-value |
|-----------------------------------------------------------------------------------------------------------------|-----------------|-------------|---------|
| Intercept                                                                                                       | 3.57            | 3.33, 3.81  | <0.001  |
| Groups                                                                                                          |                 |             |         |
| UADL vs CADL                                                                                                    | 0.14            | -0.13, 0.42 | 0.31    |
| Independence before stroke<br>(Katz Extended Index of<br>ADL) before stroke;                                    |                 |             |         |
| Dependent in personal-<br>ADL or instrumental-<br>ADL vs Independent in<br>personal-ADL and<br>instrumental-ADL | -0.11           | -0.4, 0.18  | 0.44    |

|                                                                                                    |       |               |        |
|----------------------------------------------------------------------------------------------------|-------|---------------|--------|
| Dependent in personal-ADL and instrumental-ADL vs Independent in personal-ADL and instrumental-ADL | -0.43 | -0.88, -0.004 | 0.047  |
| Stroke severity <sup>b)</sup>                                                                      |       |               |        |
| Moderate vs Mild                                                                                   | 0.47  | 0.2, 0.74     | <0.001 |
| Age <sup>c)</sup>                                                                                  | -0.01 | -0.2, -0.13   | 0.13   |
| Age x stroke severity <sup>d)</sup>                                                                | -0.02 | -0.17, 12     | 0.17   |
| <hr/>                                                                                              |       |               |        |
| R <sup>2</sup> =0.22                                                                               |       |               |        |

a) regression coefficient

b) Patients with mild stroke severity

c) B at mean age

d) patients with moderate severity, B= -0.02+(-0.01)= -0.03

Table 5c. Final regression model for the association between the geriatric rehabilitation group's *outpatient rehabilitation* (square root transformed), including all contacts with outpatient rehabilitation services 0–12 months, and the independent variable and co-variates

|                      | B <sup>a)</sup> | 95% CI        | p-value |
|----------------------|-----------------|---------------|---------|
| Intercept            | 12.51           | 6.64, 18.37   | <0.001  |
| Age                  | -0.09           | -0.17, -0.009 | 0.029   |
| <hr/>                |                 |               |         |
| R <sup>2</sup> =0.09 |                 |               |         |

a) regression coefficient

Table 5d. Final regression model for the association between geriatric rehabilitation group's *total outpatient* (square root transformed), including all contacts with outpatient health care services 0-12 months including all inpatient care 0–12 months, and the independent variable and co-variates

|                      | B <sup>a)</sup> | 95% CI       | p-value |
|----------------------|-----------------|--------------|---------|
| Intercept            | 16.47           | 10.91, 22.05 | <0.001  |
| Age                  | -0.11           | -0.19, -0.03 | 0.005   |
| <hr/>                |                 |              |         |
| R <sup>2</sup> =0.09 |                 |              |         |

1  
2  
3 a) regression coefficient  
4  
5  
6  
7

8 Table 6a. Final regression model for the association between the home  
9 rehabilitation group's *outpatient rehabilitation* (log-transformed), including all  
10 contacts with outpatient rehabilitation services 0–12 months, and the independent  
11 variable and co-variates  
12

|                           | B <sup>a)</sup> | 95% CI        | p-value |
|---------------------------|-----------------|---------------|---------|
| Intercept                 | 5               |               |         |
| Age <sup>b)</sup>         | -0.072          | -0.11, -0.02  | 0.004   |
| Groups <sup>c)</sup>      |                 |               |         |
| UADL vs CADL              | 0.75            | 0.28, 1.22    | 0.003   |
| Age x Group <sup>d)</sup> | 0.074           | 0.02, 0.12    | 0.006   |
| ADL score (Barthel Index) | -0.01           | -0.03, -0.006 | 0.003   |

13  
14  
15  
16  
17  
18  
19  
20  
21  
22  
23  
24  
25  
26 R<sup>2</sup>=0.49

27  
28 a) regression coefficient

29 b) patients in group CADL

30 c) beta-koff at mean age

31 d) patients in group UADL , B= 0.074+(-0.072)= 0.002  
32  
33  
34

35  
36 Table 6b. Final regression model for the association between the home  
37 rehabilitation group's *total outpatient* (log-transformed), including all contacts  
38 with outpatient health care services 0–12 months including all inpatient care 0–12  
39 months, and the independent variable and co-variates  
40

|                                                                              | B <sup>a)</sup> | 95% CI       | p-value |
|------------------------------------------------------------------------------|-----------------|--------------|---------|
| Intercept                                                                    | 6.57            |              |         |
| ADL score (Barthel Index)                                                    | -0.03           | -0.04, -0.02 | <0.001  |
| Group                                                                        |                 |              |         |
| UADL vs CADL                                                                 | 0.47            | 0.09, 0.84   | 0.01    |
| Independence before stroke<br>(Katz Extended Index of<br>ADL) before stroke; |                 |              |         |
| Dependent in personal-<br>ADL or instrumental-                               | -0.62           | -0.99, -0.26 | 0.001   |

ADL vs Independent in  
personal-ADL and  
instrumental-ADL

|                                                                                                                  |       |             |      |
|------------------------------------------------------------------------------------------------------------------|-------|-------------|------|
| Dependent in personal-<br>ADL and instrumental-<br>ADL vs Independent in<br>personal-ADL and<br>instrumental-ADL | -0.53 | -1.28, 0.22 | 0.16 |
|------------------------------------------------------------------------------------------------------------------|-------|-------------|------|

---

R<sup>2</sup>=0.56

a) regression coefficient

## DISCUSSION

Implementation of client-centred care and rehabilitation is supported by stakeholders in Sweden<sup>28</sup> and internationally<sup>5</sup> as a way of addressing challenges in the health care system including an aging population and rising costs. It is consequently important to evaluate the impact of client-centred care on the use of health care services. This study is, to our knowledge, the first in which the total use of health care services has been compared, and the findings suggest that receiving a client-centred occupational therapy intervention does not appear to increase the total use of health care services during the first year after a stroke. In fact, there were some areas of health service utilisation, inpatient care, where there was a significant reduction in utilisation without a cost shift into the community post discharge from the health service.

The findings in the present study showed that delivery of client-centred occupational therapy ADL interventions did not appear to increase the LOS in hospital or the number of rehabilitation or other health care contacts with outpatient care during the first year after stroke. Rather, results from multiple regression analyses suggest that clients who did not receive client-centred occupational therapy in their homes had a higher number of outpatient rehabilitation contacts and higher total number of outpatient contacts compared to clients who received CADL as home rehabilitation. Albeit, no such differences between the geriatric groups were found. Comparisons with previous studies are difficult, since interventions described as client- or person-centred care vary considerably<sup>29</sup>. Fears of client-centred care being a time-consuming enterprise have been put forward<sup>9 30</sup>. In the present study, the mean number of contacts with the OTs during the intervention period was 21.9 in the CADL group compared to 15.7 in the UADL group<sup>15</sup>, but we do not have data on the length of each contact.

1  
2  
3 The higher number of contacts might reflect that the development of a partnership/relation  
4 between the health professionals and the client, a key component in a client-centred approach,  
5 might be more time-consuming than the usual care. On the other hand, health care services  
6 that take their departures from the prioritized needs, builds on the person's own ability to  
7 handle challenges of everyday life and have a problem-solving approach could be expected to  
8 reduce health care use in the longer term. In line with this, some studies suggest that a person-  
9 centred<sup>12</sup> or integrated care<sup>13 31</sup> might contribute to a shorter LOS or lower hospitalization  
10 rate. However, these studies include only the specific health care service that has been client-  
11 or person-centred and not the total use of health care services, and none of these focused on  
12 people with stroke. As a shortened LOS could potentially increase the use of e.g. primary  
13 care, it is imperative and it is in line with this study, to capture the total use of health care  
14 services for a more extended time after the intervention.  
15  
16  
17  
18  
19  
20  
21  
22

23 Previous studies on client centered ADL interventions have shown that participants who  
24 received client centered ADL interventions were to a larger extent participating in goal-  
25 setting, planning for how the goals could be reached and follow-up of goals compared to  
26 those who received ADL as usual<sup>19</sup>. Moreover, they experienced that the intervention enabled  
27 them to feel as owners of their own rehabilitation process<sup>32 33</sup>. This suggests that the effect of  
28 the CADL intervention on healthcare usage might be related to a changed healthcare seeking  
29 behavior of an activated patient. Similar results have also been found in other settings,  
30 showing an inverse association between patient activation (knowledge, skills and confidence)  
31 and healthcare usage, i.e. patients with higher levels of activation had lower healthcare  
32 usage<sup>33</sup>. In the present study, we can only ascertain that the OTs delivered a client-centered  
33 service. As rehabilitation after stroke should be team based<sup>34-36</sup> and the occupational therapist  
34 is only one among several professions in the team, it might be questioned to what extent the  
35 care and rehabilitation as a whole was client-centred. In order to provide client-centred care  
36 and rehabilitation, embracing all the clients' needs, priorities and values, future interventions  
37 should involve the entire team in a shared approach to explore how such a team-based  
38 intervention could effect healthcare usage.  
39  
40  
41  
42  
43  
44  
45  
46  
47  
48  
49

50 In addition to the main results in the study, in four of the eight models the findings showed  
51 associations between higher age and a lower use of health care services; both LOS during the  
52 initial episode of care and contacts with outpatient rehabilitation services and total outpatient  
53 health care contacts. Previous studies have reported similar findings from Sweden<sup>26</sup> and 10  
54 European countries<sup>37</sup>, whereas an American and a Danish study report more similar use<sup>38 39</sup>.  
55  
56  
57  
58  
59  
60

1  
2  
3 Another difference in resource use was that women appeared to receive shorter initial LOS at  
4 the stroke unit and in inpatient geriatric rehabilitation after a stroke. These findings suggest an  
5 inequity in resource use based on age and sex, and should be further investigated and  
6 followed closely.  
7  
8

9  
10 A strength of the present study is its use of computerized data on the use of health care  
11 services as recall bias is eliminated. Furthermore, we conducted the analyses separately for  
12 the two groups of clients – those included at the geriatric rehabilitation ward and those  
13 included at units that provided home rehabilitation – as there might be different patterns in the  
14 use of health care services depending on how the rehabilitation is organized<sup>40 41</sup>. However,  
15 this entails that the groups were quite small, and the ability to identify differences that are  
16 small but of clinical relevance were limited. Another strength is that the comparison between  
17 CADL and UADL were adjusted for other variables that might influence the resource use of  
18 health care services. We presume that, based on the inclusion criterion in the study and the  
19 level of disability reported in data from the Swedish Stroke Register<sup>42</sup> the findings in the  
20 present study may be valid for approximately 25-30% of the stroke population.  
21  
22  
23  
24  
25  
26  
27

28 We conclude that the provision of a client-centred occupational therapy ADL interventions  
29 after stroke did not appear to prolong the LOS, nor did it increase the number of contacts with  
30 outpatient health care services during the first year after stroke. Client-centred services may  
31 thus be implemented even though more evidence on the effect on client and family outcomes  
32 and resource use through a full powered RCT with economic evaluation is warranted.  
33  
34  
35  
36

### 37 **ETHICAL PPROVAL**

38  
39  
40 The Regional Ethical Review Board in Stockholm approved the study. Registration Clinical  
41 Trials gov. identifier: NCT0 1417585.  
42  
43

### 44 **FUNDING STATEMENT**

45  
46 Supported by grants provided by the Stockholm County Council (ALF project) number  
47 20080156 and 20100107, Swedish Research Council project number 2010-2943, The Swedish  
48 Stroke Association, and Doctoral School in Health Care Sciences at Karolinska Institutet.  
49  
50

51  
52 Role of funders: The funders neither have had nor will have any role in study design, data  
53 collection and analysis, decision to publish or preparation of the manuscript.  
54  
55

56 **COMPETING INTEREST:** None declared  
57  
58  
59

1  
2  
3 **DATA SHARING STATEMENT:** Data set is available on request  
4

5 **AUTHORS CONTRIBUTIONS:**  
6

7 MT made direct and substantial contribution to this work by having a leading role in analyses,  
8 interpretation of data and drafting of the work. MF, CY, GE, SG and KT made direct and  
9 substantial contribution to the work by contributing to the design of the work acquisition of  
10 data, drafting of the article and by providing critical revisions important for the intellectual  
11 content. LvK is the principal investigator and made direct and substantial contribution by  
12 having a leading role in the conception and design of the work acquisition and has contributed  
13 in analysis, interpretation of data and drafting of the work and by providing critical revisions  
14 important for the intellectual content. All the authors have read and approved the final version  
15 of the manuscript.  
16  
17  
18  
19  
20  
21

22 **REFERENCES**  
23

- 24  
25 1. Law M, Baptiste S, Mills J. Client-centred practice: what does it mean and does it make a  
26 difference? *Can J Occup Ther* 1995; 62: 250-7.  
27  
28 2. Leplege A, Gzil F, Cammelli M, et al. Person-centredness: conceptual and historical  
29 perspectives. *Disabil Rehabil* 2007; 29: 1555-65.  
30  
31 3. Sugavanam T, Mead G, Bulley C, et al. The effects and experiences of goal setting in  
32 stroke rehabilitation - a systematic review. *Disabil Rehabil* 2013; 35: 177-90.  
33  
34 4. Rosewilliam S, Roskell CA, Pandyan AD. A systematic review and synthesis of the  
35 quantitative and qualitative evidence behind patient-centred goal setting in stroke  
36 rehabilitation. *Clin Rehabil* 2011; 25: 501-14.  
37  
38 5. Institute of Medicine. Crossing the Quality Chasm: A New Health System for the 21st  
39 Century. 2001.  
40  
41 6. Arah OA, Westert GP, Hurst J, et al. A conceptual framework for the OECD Health Care  
42 Quality Indicators Project. *Int J Qual Health Care* 2006; 18 Suppl 1: 5-13.  
43  
44 7. Myndigheten för vårdanalys. [the Swedish Agency for Health and Care Services Analysis]  
45 Vården ur patienternas perspektiv - jämförelser mellan Sverige och 10 andra länder. [Health  
46 care services from the patients' perspective – comparisons between Sweden and 10 other  
47 countries.] 2014. [http://www.vardanalys.se/wp-content/uploads/2017/12/2014-11-](http://www.vardanalys.se/wp-content/uploads/2017/12/2014-11-V%C3%A5rden-ur-patienternas-perspektiv.pdf)  
48 [V%C3%A5rden-ur-patienternas-perspektiv.pdf](http://www.vardanalys.se/wp-content/uploads/2017/12/2014-11-V%C3%A5rden-ur-patienternas-perspektiv.pdf) (accessed 21 January 2018)  
49  
50 8. Plant SE, Tyson SF, Kirk S, et al. What are the barriers and facilitators to goal-setting  
51 during rehabilitation for stroke and other acquired brain injuries? A systematic review and  
52 meta-synthesis. *Clin Rehabil* 2016; 30: 921-30.  
53  
54 9. Moore L, Britten N, Lydahl D, et al. Barriers and facilitators to the implementation of  
55 person-centred care in different healthcare contexts. *Scand J Caring Sci* 2016.  
56  
57  
58  
59



10. Swedish Health and Medical Service Act (1982:763).
11. Hansen LO, Young RS, Hinami K, et al. Interventions to reduce 30-day rehospitalization: a systematic review. *Ann Intern Med* 2011; 155: 520-8.
12. Ekman I, Wolf A, Olsson LE, et al. Effects of person-centred care in patients with chronic heart failure: the PCC-HF study. *Eur Heart J* 2012; 33: 1112-9.
13. Olsson LE, Karlsson J, Ekman I. The integrated care pathway reduced the number of hospital days by half: a prospective comparative study of patients with acute hip fracture. *J Orthop Surg Res* 2006; 1: 3.
14. Leppin AL, Gionfriddo MR, Kessler M, et al. Preventing 30-day hospital readmissions: a systematic review and meta-analysis of randomized trials. *JAMA Intern Med* 2014; 174: 1095-107.
15. Bertilsson AS, Ranner M, von Koch L, et al. A client-centred ADL intervention: three-month follow-up of a randomized controlled trial. *Scand J Occup Ther* 2014; 21: 377-91.
16. Guidetti S, Ranner M, Tham K, et al. A "client-centred activities of daily living" intervention for persons with stroke: One-year follow-up of a randomized controlled trial. *J Rehabil Med* 2015; 47: 605-11.
17. Bertilsson AS, Eriksson G, Ekstam L, et al. A cluster randomized controlled trial of a client-centred, activities of daily living intervention for people with stroke: one year follow-up of caregivers. *Clin Rehabil* 2016;30(8):765-75.
18. Sonn U, Asberg KH. Assessment of activities of daily living in the elderly. A study of a population of 76-year-olds in Gothenburg, Sweden. *Scand J Rehabil Med* 1991; 23: 193-202.
19. Flink M, Bertilsson AS, Johansson U, et al. Training in client-centeredness enhances occupational therapist documentation on goal setting and client participation in goal setting in the medical records of people with stroke. *Clin Rehabil* 2015; 8: 0269215515620256.
20. Mahoney FI, Barthel DW. Functional Evaluation: The Barther Index. *Md State Med J* 1965; 14: 61-5.
21. Govan L, Langhorne P, Weir CJ. Categorizing stroke prognosis using different stroke scales. *Stroke* 2009; 40: 3396-9.
22. Duncan PW, Bode RK, Min Lai S, et al. Rasch analysis of a new stroke-specific outcome scale: the Stroke Impact Scale. *Arch Phys Med Rehabil* 2003; 84: 950-63.
23. Guidetti S, Asaba E, Tham K. Meaning of context in recapturing self-care after stroke or spinal cord injury. *Am J Occup Ther* 2009;63(3):323-32.
24. Guidetti S, Asaba E, Tham K. The lived experience of recapturing self-care. *Am J Occup Ther* 2007;61(3):303-10.
25. Gachoud D, Albert M, Kuper A, et al. Meanings and perceptions of patient-centeredness in social work, nursing and medicine: a comparative study. *J Interprof Care* 2012;26(6):484-90. doi: 10.3109/13561820.2012.717553



- 1  
2  
3 26. Palmcrantz S, Holmqvist LW, Sommerfeld DK, et al. Differences between younger and  
4 older individuals in their use of care and rehabilitation but not in self-perceived global  
5 recovery 1year after stroke. *J Neurol Sci* 2012;321(1-2):29-34.  
6  
7 27. Kumlien S, Axelsson K, Ljunggren G, et al. Stroke patients ready for discharge from  
8 acute care--a multi-dimensional assessment of functions and further care. *Disabil Rehabil*  
9 1999;21(1):31-8.  
10  
11 28. Swedish Association of Local Authorities and Regions. Government document.  
12 [https://skl.se/download/18.85439e61506cc4d3a2765a5/1445863105802/Motion+61+Personce](https://skl.se/download/18.85439e61506cc4d3a2765a5/1445863105802/Motion+61+Personce+ntretrad+v%C3%A5rd.pdf)  
13 [ntretrad+v%C3%A5rd.pdf](https://skl.se/download/18.85439e61506cc4d3a2765a5/1445863105802/Motion+61+Personce+ntretrad+v%C3%A5rd.pdf) (accessed 21 January 2018).  
14  
15 29. McMillan SS, Kendall E, Sav A, et al. Patient-centered approaches to health care: a  
16 systematic review of randomized controlled trials. *Med Care Res Rev* 2013;70(6):567-96.  
17  
18 30. Naldemirci O, Wolf A, Elam M, et al. Deliberate and emergent strategies for  
19 implementing person-centred care: a qualitative interview study with researchers,  
20 professionals and patients. *BMC Health Serv Res* 2017;17(1):527. doi: 10.1186/s12913-017-  
21 2470-2  
22  
23 31. Casas A, Troosters T, Garcia-Aymerich J, et al. Integrated care prevents hospitalisations  
24 for exacerbations in COPD patients. *Eur Respir J* 2006;28(1):123-30. [published Online First:  
25 2006/04/14 09:00]  
26  
27 32. Ranner M. Evaluation and experiences of a client-centred ADL intervention after stroke.  
28 [Doctoral thesis]. Karolinska Institutet; 2016.  
29  
30 33. Kinney RL, Lemon SC, Person SD, et al. The association between patient activation and  
31 medication adherence, hospitalization, and emergency room utilization in patients with  
32 chronic illnesses: a systematic review. *Patient Educ Couns* 2015;98(5):545-52. doi:  
33 10.1016/j.pec.2015.02.005  
34  
35 34. Langhorne P, Bernhardt J, Kwakkel G. Stroke rehabilitation. *Lancet*  
36 2011;377(9778):1693-702.  
37  
38 35. Langhorne P, Pollock A. What are the components of effective stroke unit care? *Age*  
39 *Ageing* 2002;31(5):365-71.  
40  
41 36. Fisher RJ, Gaynor C, Kerr M, et al. A consensus on stroke: early supported discharge.  
42 *Stroke* 2011;42(5):1392-7.  
43  
44 37. Bhalla A, Grieve R, Tilling K, et al. Older stroke patients in Europe: stroke care and  
45 determinants of outcome. *Age Ageing* 2004;33(6):618-24. doi: 10.1093/ageing/afh219  
46  
47 38. Palnum KD, Petersen P, Sorensen HT, et al. Older patients with acute stroke in Denmark:  
48 quality of care and short-term mortality. A nationwide follow-up study. *Age Ageing*  
49 2008;37(1):90-5. doi: 10.1093/ageing/afm134  
50  
51 39. Fonarow GC, Reeves MJ, Zhao X, et al. Age-related differences in characteristics,  
52 performance measures, treatment trends, and outcomes in patients with ischemic stroke.  
53 *Circulation* 2010;121(7):879-91.  
54  
55 40. Fearon P, Langhorne P, Early Supported Discharge T. Services for reducing duration of  
56 hospital care for acute stroke patients. 2012; 9: CD000443.  
57  
58  
59  
60

1  
2  
3 41. Tistad M, von Koch L. Usual Clinical Practice for Early Supported Discharge after Stroke  
4 with Continued Rehabilitation at Home: An Observational Comparative Study. PLoS One  
5 2015;10(7):e0133536.

6  
7 42. RIKSSTROKE The Swedish Stroke Register. Annual report 2016.  
8 [http://www.riksstroke.org/wp-](http://www.riksstroke.org/wp-content/uploads/2017/07/Riksstroke%C3%85rsrapport2016_slutversion.pdf)  
9 [content/uploads/2017/07/Riksstroke%C3%85rsrapport2016\\_slutversion.pdf](http://www.riksstroke.org/wp-content/uploads/2017/07/Riksstroke%C3%85rsrapport2016_slutversion.pdf) (accessed april  
10 2018).  
11  
12  
13  
14  
15  
16  
17  
18  
19  
20  
21  
22  
23  
24  
25  
26  
27  
28  
29  
30  
31  
32  
33  
34  
35  
36  
37  
38  
39  
40  
41  
42  
43  
44  
45  
46  
47  
48  
49  
50  
51  
52  
53  
54  
55  
56  
57  
58  
59  
60

STROBE Statement—Checklist of items that should be included in reports of *cohort studies*

|                              | Item No | Recommendation                                                                                                                                                                                    | page    |
|------------------------------|---------|---------------------------------------------------------------------------------------------------------------------------------------------------------------------------------------------------|---------|
| <b>Title and abstract</b>    | 1       | (a) Indicate the study's design with a commonly used term in the title or the abstract                                                                                                            | 1       |
|                              |         | (b) Provide in the abstract an informative and balanced summary of what was done and what was found                                                                                               | 3       |
| <b>Introduction</b>          |         |                                                                                                                                                                                                   |         |
| Background/rationale         | 2       | Explain the scientific background and rationale for the investigation being reported                                                                                                              | 6-7     |
| Objectives                   | 3       | State specific objectives, including any prespecified hypotheses                                                                                                                                  | 7       |
| <b>Methods</b>               |         |                                                                                                                                                                                                   |         |
| Study design                 | 4       | Present key elements of study design early in the paper                                                                                                                                           | 7       |
| Setting                      | 5       | Describe the setting, locations, and relevant dates, including periods of recruitment, exposure, follow-up, and data collection                                                                   | 7-10    |
| Participants                 | 6       | (a) Give the eligibility criteria, and the sources and methods of selection of participants. Describe methods of follow-up                                                                        | 7-8     |
|                              |         | (b) For matched studies, give matching criteria and number of exposed and unexposed                                                                                                               | n.a.    |
| Variables                    | 7       | Clearly define all outcomes, exposures, predictors, potential confounders, and effect modifiers. Give diagnostic criteria, if applicable                                                          | 7, 8, 9 |
| Data sources/<br>measurement | 8*      | For each variable of interest, give sources of data and details of methods of assessment (measurement). Describe comparability of assessment methods if there is more than one group              | 8,9     |
| Bias                         | 9       | Describe any efforts to address potential sources of bias                                                                                                                                         | n.a.    |
| Study size                   | 10      | Explain how the study size was arrived at                                                                                                                                                         | 9       |
| Quantitative variables       | 11      | Explain how quantitative variables were handled in the analyses. If applicable, describe which groupings were chosen and why                                                                      | 9-10    |
| Statistical methods          | 12      | (a) Describe all statistical methods, including those used to control for confounding                                                                                                             | 9-10    |
|                              |         | (b) Describe any methods used to examine subgroups and interactions                                                                                                                               | 9-10    |
|                              |         | (c) Explain how missing data were addressed                                                                                                                                                       | n.a.    |
|                              |         | (d) If applicable, explain how loss to follow-up was addressed                                                                                                                                    | n.a.    |
|                              |         | (e) Describe any sensitivity analyses                                                                                                                                                             | n.a.    |
| <b>Results</b>               |         |                                                                                                                                                                                                   |         |
| Participants                 | 13*     | (a) Report numbers of individuals at each stage of study—eg numbers potentially eligible, examined for eligibility, confirmed eligible, included in the study, completing follow-up, and analysed | 10      |
|                              |         | (b) Give reasons for non-participation at each stage                                                                                                                                              | n.a.    |
|                              |         | (c) Consider use of a flow diagram                                                                                                                                                                |         |
| Descriptive data             | 14*     | (a) Give characteristics of study participants (eg demographic, clinical, social) and information on exposures and potential confounders                                                          | 10-13   |
|                              |         | (b) Indicate number of participants with missing data for each variable of interest                                                                                                               | n.a.    |
|                              |         | (c) Summarise follow-up time (eg, average and total amount)                                                                                                                                       | n.a.    |
| Outcome data                 | 15*     | Report numbers of outcome events or summary measures over time                                                                                                                                    | n.a.    |
| Main results                 | 16      | (a) Give unadjusted estimates and, if applicable, confounder-adjusted estimates and their precision (eg, 95% confidence interval). Make clear                                                     | 14-22   |

|                          |    |                                                                                                                                                                            |       |
|--------------------------|----|----------------------------------------------------------------------------------------------------------------------------------------------------------------------------|-------|
|                          |    | which confounders were adjusted for and why they were included                                                                                                             |       |
|                          |    | (b) Report category boundaries when continuous variables were categorized                                                                                                  | 9-10  |
|                          |    | (c) If relevant, consider translating estimates of relative risk into absolute risk for a meaningful time period                                                           | n.a.  |
| Other analyses           | 17 | Report other analyses done—eg analyses of subgroups and interactions, and sensitivity analyses                                                                             | 23-27 |
| <b>Discussion</b>        |    |                                                                                                                                                                            |       |
| Key results              | 18 | Summarise key results with reference to study objectives                                                                                                                   | 27    |
| Limitations              | 19 | Discuss limitations of the study, taking into account sources of potential bias or imprecision. Discuss both direction and magnitude of any potential bias                 | 29    |
| Interpretation           | 20 | Give a cautious overall interpretation of results considering objectives, limitations, multiplicity of analyses, results from similar studies, and other relevant evidence | 27-29 |
| Generalisability         | 21 | Discuss the generalisability (external validity) of the study results                                                                                                      | 29    |
| <b>Other information</b> |    |                                                                                                                                                                            |       |
| Funding                  | 22 | Give the source of funding and the role of the funders for the present study and, if applicable, for the original study on which the present article is based              | 29    |

\*Give information separately for exposed and unexposed groups.

**Note:** An Explanation and Elaboration article discusses each checklist item and gives methodological background and published examples of transparent reporting. The STROBE checklist is best used in conjunction with this article (freely available on the Web sites of PLoS Medicine at <http://www.plosmedicine.org/>, Annals of Internal Medicine at <http://www.annals.org/>, and Epidemiology at <http://www.epidem.com/>). Information on the STROBE Initiative is available at <http://www.strobe-statement.org>.
